# Supplementary material for: Smart extrusion via data-driven prediction of grain size and peripheral coarse grain defect formation
Source: Springer Nature journal article supplement (doi:10.1038/s41598-025-94884-4), 2025-03-19
Supplement: MOESM1 [file 41598_2025_94884_MOESM1_ESM.xlsx]

## Sheet: Combined
Condition	Row_Coloumn	Temperature [°C]	Plastic Strain	Max Strain Rate	Max SR Zener	teta	rohi	Subgrain Size	Stored Energy	Xdrx	Temp_2	Effective Stress [MPa]	Vel_Z	Delta_Vel_Z	Dimensione Grano	PCG (corretti)
LBT-2mm/s	1_16	486	82.1	141.8	1.38604e+18	6.8629	2.59634e+13	0.271598	628202	0.999978	486.194	16.9614	-36.7925	1.22292	11	no
LBT-2mm/s	1_17	486	99.6	172.1	1.68221e+18	6.92968	2.73571e+13	0.264682	653881	0.999998	486.102	16.9703	-36.7961	1.23271	11	no
LBT-2mm/s	1_18	486	89.6	149.9	1.46521e+18	6.88199	2.63558e+13	0.269593	635463	0.999993	485.959	16.986	-36.8004	1.24477	11	no
LBT-2mm/s	1_19	485	79.6	127.6	1.30932e+18	6.84339	2.55673e+13	0.273672	620844	0.999968	485.768	17.0148	-36.8058	1.25936	11	no
LBT-2mm/s	1_20	485	74.5	123	1.26212e+18	6.83084	2.53151e+13	0.275019	616146	0.999932	485.558	17.038	-36.8121	1.27681	11	no
LBT-2mm/s	1_21	485	69.4	118.4	1.21492e+18	6.81783	2.50559e+13	0.276426	611305	0.999854	485.498	17.0426	-36.8148	1.28428	11	no
LBT-2mm/s	1_22	485	71.5	127.4	1.30727e+18	6.84285	2.55565e+13	0.27373	620643	0.999893	485.487	17.0424	-36.8158	1.287	11	no
LBT-2mm/s	1_23	485	73.6	136.3	1.39859e+18	6.86599	2.60267e+13	0.271271	629374	0.999922	485.47	17.0397	-36.8179	1.29275	11	no
LBT-2mm/s	1_24	485	68	123.5	1.26725e+18	6.83222	2.53429e+13	0.27487	616663	0.999821	485.448	17.0375	-36.8207	1.30049	11	no
LBT-2mm/s	1_25	485	62.4	110.6	1.13488e+18	6.79464	2.45991e+13	0.278963	602746	0.999594	485.433	17.034	-36.8248	1.31178	11	no
LBT-2mm/s	1_26	485	62.2	112.5	1.15438e+18	6.80043	2.47125e+13	0.278326	604874	0.999582	485.457	17.0261	-36.8276	1.31943	11	no
LBT-2mm/s	1_27	485	61.9	114.4	1.17387e+18	6.80613	2.48245e+13	0.277702	606974	0.999563	485.491	17.0177	-36.8304	1.32723	11	no
LBT-2mm/s	1_28	493	66.5	117.3	8.18981e+17	6.68471	2.25251e+13	0.291492	563395	0.999777	485.515	17.0135	-36.8321	1.33176	11	no
LBT-2mm/s	1_29	485	71.1	120.2	1.23339e+18	6.82298	2.51582e+13	0.275868	613217	0.999887	485.532	17.0111	-36.8331	1.33447	11	no
LBT-2mm/s	1_30	485	74.8	115.1	1.18105e+18	6.8082	2.48654e+13	0.277475	607740	0.999935	485.685	16.9973	-36.8399	1.35341	11	no
LBT-2mm/s	1_31	486	69.1	118.1	1.15438e+18	6.80043	2.47125e+13	0.278326	604875	0.999848	485.871	16.9882	-36.8471	1.37309	11	no
LBT-2mm/s	1_32	486	63.4	121.1	1.18371e+18	6.80897	2.48805e+13	0.277392	608022	0.999649	486.084	16.9869	-36.8542	1.39254	11	no
LBT-2mm/s	1_33	486	71.9	120.2	1.17491e+18	6.80643	2.48304e+13	0.277669	607085	0.999899	486.365	16.9859	-36.8611	1.41177	11	no
LBT-2mm/s	1_34	486	80.4	119.3	1.16611e+18	6.80387	2.47801e+13	0.277949	606141	0.999972	486.629	16.9918	-36.8683	1.43143	11	no
LBT-2mm/s	1_35	487	71.2	113.5	1.05695e+18	6.77052	2.41311e+13	0.28164	593938	0.999888	486.946	17.0041	-36.8751	1.45025	11	no
LBT-2mm/s	1_36	487	61.9	107.6	1.00201e+18	6.75247	2.37858e+13	0.283669	587413	0.999563	487.258	17.0382	-36.8819	1.46891	11	no
LBT-2mm/s	1_37	487	63.3	115.1	1.07185e+18	6.77526	2.42225e+13	0.281111	595661	0.999644	487.535	17.1143	-36.8886	1.48731	11	no
LBT-2mm/s	1_38	487	64.7	122.5	1.14076e+18	6.7964	2.46335e+13	0.278769	603391	0.99971	487.788	17.1927	-36.8949	1.50452	12	no
LBT-2mm/s	1_39	488	65.3	118.5	1.05146e+18	6.76875	2.40972e+13	0.281837	593298	0.999734	487.997	17.2838	-36.9008	1.52089	12	no
LBT-2mm/s	1_40	488	65.9	114.4	1.01508e+18	6.75685	2.38692e+13	0.283175	588991	0.999756	488.167	17.4133	-36.906	1.53525	12	no
LBT-2mm/s	1_41	488	66.9	119	1.0559e+18	6.77018	2.41246e+13	0.281678	593816	0.99979	488.255	17.4971	-36.9091	1.54382	12	no
LBT-2mm/s	1_42	488	67.8	123.5	1.09583e+18	6.78275	2.43676e+13	0.280277	598394	0.999816	488.311	17.5367	-36.9114	1.55011	12	no
LBT-2mm/s	1_43	488	68.7	122.1	1.08341e+18	6.77889	2.42927e+13	0.280706	596984	0.999839	488.349	17.5746	-36.9134	1.55556	12	no
LBT-2mm/s	1_44	488	69.5	120.6	1.0701e+18	6.7747	2.42118e+13	0.281173	595459	0.999857	488.369	17.6033	-36.9146	1.55879	12	no
LBT-2mm/s	1_45	488	70.4	118.5	1.05146e+18	6.76875	2.40972e+13	0.281837	593298	0.999874	488.382	17.625	-36.9154	1.56112	12	no
LBT-2mm/s	1_46	488	71.3	116.4	1.03283e+18	6.7627	2.39812e+13	0.282515	591107	0.99989	488.39	17.6379	-36.9161	1.56285	12	no
LBT-2mm/s	1_47	488	75.3	116.8	1.03638e+18	6.76386	2.40034e+13	0.282385	591527	0.999939	488.395	17.6437	-36.9167	1.56457	12	no
LBT-2mm/s	1_48	488	79.3	117.2	1.03993e+18	6.76502	2.40256e+13	0.282255	591946	0.999967	488.397	17.6434	-36.9172	1.56605	12	no
LBT-2mm/s	1_49	488	75.3	116.8	1.03638e+18	6.76386	2.40034e+13	0.282385	591527	0.999939	488.398	17.64	-36.9178	1.56755	10	no
LBT-2mm/s	1_50	488	71.3	116.4	1.03283e+18	6.7627	2.39812e+13	0.282515	591107	0.99989	488.396	17.6372	-36.9183	1.56895	10	no
LBT-2mm/s	1_51	488	70.4	118.5	1.05146e+18	6.76875	2.40972e+13	0.281837	593298	0.999874	488.394	17.6461	-36.9187	1.5702	10	no
LBT-2mm/s	1_52	488	69.5	120.6	1.0701e+18	6.7747	2.42118e+13	0.281173	595459	0.999857	488.39	17.6591	-36.9191	1.57107	10	no
LBT-2mm/s	1_53	488	68.7	122.1	1.08341e+18	6.77889	2.42927e+13	0.280706	596984	0.999839	488.377	17.6684	-36.9195	1.57235	10	no
LBT-2mm/s	1_54	488	67.8	123.5	1.09583e+18	6.78275	2.43676e+13	0.280277	598394	0.999816	488.353	17.6416	-36.9199	1.57341	10	no
LBT-2mm/s	1_55	488	66.9	119	1.0559e+18	6.77018	2.41246e+13	0.281678	593816	0.99979	488.31	17.6067	-36.9201	1.57384	10	no
LBT-2mm/s	1_56	488	65.9	114.4	1.01508e+18	6.75685	2.38692e+13	0.283175	588991	0.999756	488.227	17.5697	-36.9196	1.57263	10	no
LBT-2mm/s	1_57	488	65.3	118.5	1.05146e+18	6.76875	2.40972e+13	0.281837	593298	0.999734	488.081	17.4727	-36.9184	1.56931	10	no
LBT-2mm/s	1_58	487	64.7	122.5	1.14076e+18	6.7964	2.46335e+13	0.278769	603391	0.99971	487.891	17.3546	-36.9166	1.56422	10	no
LBT-2mm/s	1_59	487	63.3	115.1	1.07185e+18	6.77526	2.42225e+13	0.281111	595661	0.999644	487.656	17.2459	-36.914	1.55714	10	no
LBT-2mm/s	1_60	487	61.9	107.6	1.00201e+18	6.75247	2.37858e+13	0.283669	587413	0.999563	487.393	17.1175	-36.9111	1.54915	11	no
LBT-2mm/s	1_61	487	71.2	113.5	1.05695e+18	6.77052	2.41311e+13	0.28164	593938	0.999888	487.099	17.0787	-36.9078	1.54009	11	no
LBT-2mm/s	1_62	486	80.4	119.3	1.16611e+18	6.80387	2.47801e+13	0.277949	606141	0.999972	486.788	17.0362	-36.904	1.52976	11	no
LBT-2mm/s	1_63	486	71.9	120.2	1.17491e+18	6.80643	2.48304e+13	0.277669	607085	0.999899	486.515	17.0069	-36.9007	1.52055	11	no
LBT-2mm/s	1_64	486	63.4	121.1	1.18371e+18	6.80897	2.48805e+13	0.277392	608022	0.999649	486.234	17.0061	-36.897	1.51035	11	no
LBT-2mm/s	1_65	486	69.1	118.1	1.15438e+18	6.80043	2.47125e+13	0.278326	604875	0.999848	485.991	16.9919	-36.8931	1.49972	11	no
LBT-2mm/s	1_66	485	74.8	115.1	1.18105e+18	6.8082	2.48654e+13	0.277475	607740	0.999935	485.786	16.9881	-36.8894	1.48938	11	no
LBT-2mm/s	1_67	485	75.5	120.2	1.23339e+18	6.82298	2.51582e+13	0.275868	613217	0.999941	485.648	17.0021	-36.8862	1.48066	11	no
LBT-2mm/s	1_68	493	66.5	117.3	8.18981e+17	6.68471	2.25251e+13	0.291492	563395	0.999777	485.629	17.0041	-36.8857	1.47918	11	no
LBT-2mm/s	1_69	485	61.9	114.4	1.17387e+18	6.80613	2.48245e+13	0.277702	606974	0.999563	485.588	17.0075	-36.8845	1.47601	11	no
LBT-2mm/s	1_70	485	62.2	112.5	1.15438e+18	6.80043	2.47125e+13	0.278326	604874	0.999582	485.54	17.0128	-36.8831	1.4721	12	no
LBT-2mm/s	1_71	485	62.4	110.6	1.13488e+18	6.79464	2.45991e+13	0.278963	602746	0.999594	485.474	17.0245	-36.8808	1.46596	12	no
LBT-2mm/s	1_72	485	68	123.5	1.26725e+18	6.83222	2.53429e+13	0.27487	616663	0.999821	485.45	17.03	-36.8793	1.4617	12	no
LBT-2mm/s	1_73	485	73.6	136.3	1.39859e+18	6.86599	2.60267e+13	0.271271	629374	0.999922	485.45	17.0327	-36.8778	1.45757	12	no
LBT-2mm/s	1_74	485	71.5	127.4	1.30727e+18	6.84285	2.55565e+13	0.27373	620643	0.999893	485.461	17.0334	-36.8769	1.45518	12	no
LBT-2mm/s	1_75	485	69.4	118.4	1.21492e+18	6.81783	2.50559e+13	0.276426	611305	0.999854	485.469	17.0337	-36.8764	1.4537	12	no
LBT-2mm/s	1_76	485	74.5	123	1.26212e+18	6.83084	2.53151e+13	0.275019	616146	0.999932	485.506	17.0358	-36.8745	1.4484	12	no
LBT-2mm/s	1_77	485	79.6	127.6	1.30932e+18	6.84339	2.55673e+13	0.273672	620844	0.999968	485.664	17.0146	-36.8708	1.43822	12	no
LBT-2mm/s	1_78	486	85.2	149.9	1.46521e+18	6.88199	2.63558e+13	0.269593	635463	0.999986	485.872	16.9913	-36.8675	1.42937	12	no
LBT-2mm/s	1_79	486	83.3	172.1	1.68221e+18	6.92968	2.73571e+13	0.264682	653881	0.999982	486.02	16.9741	-36.8652	1.42289	12	no
LBT-2mm/s	1_80	486	82.1	141.8	1.38604e+18	6.8629	2.59634e+13	0.271598	628202	0.999978	486.122	16.9653	-36.8631	1.41719	12	no
LBT-2mm/s	2_15	486	77.4	104.6	1.02242e+18	6.75928	2.39157e+13	0.2829	589870	0.999956	486.248	16.9545	-36.7881	1.21076	10	no
LBT-2mm/s	2_16	486	78.8	120.3	1.17589e+18	6.80671	2.4836e+13	0.277638	607189	0.999964	486.181	16.9603	-36.7912	1.21927	11	no
LBT-2mm/s	2_17	486	80.2	135.9	1.32837e+18	6.84833	2.56672e+13	0.273144	622702	0.999971	486.094	16.969	-36.7952	1.23044	11	no
LBT-2mm/s	2_18	486	68.9	112.3	1.09769e+18	6.78333	2.43788e+13	0.280213	598604	0.999843	485.958	16.9841	-36.8	1.24344	11	no
LBT-2mm/s	2_19	485	57.5	88.7	9.10161e+17	6.72009	2.31763e+13	0.287367	575840	0.999173	485.768	17.0131	-36.8054	1.25827	11	no
LBT-2mm/s	2_20	485	52.6	83.4	8.55777e+17	6.69942	2.2794e+13	0.289766	568544	0.998327	485.562	17.0374	-36.8118	1.27599	11	no
LBT-2mm/s	2_21	485	47.7	78.1	8.01393e+17	6.67746	2.23935e+13	0.292349	560869	0.996642	485.501	17.0424	-36.8145	1.2835	11	no
LBT-2mm/s	2_22	485	49.1	84.6	8.6809e+17	6.7042	2.28821e+13	0.289208	570227	0.997246	485.489	17.0424	-36.8155	1.28621	11	no
LBT-2mm/s	2_23	485	50.5	91.1	9.34788e+17	6.72906	2.3344e+13	0.286334	579031	0.997743	485.472	17.0398	-36.8176	1.29203	11	no
LBT-2mm/s	2_24	485	49.7	88.9	9.12213e+17	6.72084	2.31904e+13	0.287279	576109	0.997471	485.453	17.0366	-36.8205	1.29984	11	no
LBT-2mm/s	2_25	485	48.8	86.7	8.89639e+17	6.71243	2.30341e+13	0.288252	573129	0.997126	485.44	17.0327	-36.8246	1.3112	11	no
LBT-2mm/s	2_26	485	44.8	79.1	8.11654e+17	6.68171	2.24705e+13	0.291847	562348	0.994949	485.462	17.0246	-36.8274	1.31881	11	no
LBT-2mm/s	2_27	485	40.8	71.5	7.3367e+17	6.64805	2.18659e+13	0.295866	550711	0.991173	485.496	17.0156	-36.8302	1.32653	11	no
LBT-2mm/s	2_28	493	37.7	65.5	4.57317e+17	6.49277	1.9246e+13	0.315564	499354	0.986455	485.52	17.0113	-36.8318	1.33104	11	no
LBT-2mm/s	2_29	485	34.6	59.5	6.10536e+17	6.58726	2.08077e+13	0.303345	530155	0.979301	485.537	17.0089	-36.8328	1.33375	11	no
LBT-2mm/s	2_30	485	38.9	58.5	6.00275e+17	6.58168	2.07127e+13	0.304046	528297	0.988518	485.69	16.9963	-36.8397	1.35282	11	no
LBT-2mm/s	2_31	486	33.3	50.9	4.97528e+17	6.52018	1.9689e+13	0.311941	508149	0.975305	485.876	16.9867	-36.8469	1.37253	11	no
LBT-2mm/s	2_32	486	27.7	43.3	4.23241e+17	6.46768	1.88478e+13	0.318936	491406	0.947695	486.091	16.9857	-36.854	1.39206	11	no
LBT-2mm/s	2_33	486	40.8	61.1	5.97229e+17	6.58	2.06843e+13	0.304257	527741	0.991173	486.364	16.9848	-36.861	1.41129	11	no
LBT-2mm/s	2_34	486	53.8	78.8	7.70239e+17	6.66423	2.2155e+13	0.293923	556284	0.998591	486.633	16.9905	-36.8681	1.43095	11	no
LBT-2mm/s	2_35	487	46	70.6	6.57453e+17	6.61168	2.12279e+13	0.300305	538345	0.995733	486.948	17.0018	-36.8749	1.44972	11	no
LBT-2mm/s	2_36	487	38.1	62.4	5.81091e+17	6.571	2.05319e+13	0.305395	524756	0.98718	487.258	17.0358	-36.8817	1.46839	11	no
LBT-2mm/s	2_37	487	42.9	75.4	7.02152e+17	6.63347	2.16082e+13	0.297633	545727	0.99341	487.536	17.1115	-36.8884	1.4867	11	no
LBT-2mm/s	2_38	487	47.6	88.3	8.22281e+17	6.68606	2.25496e+13	0.291334	563864	0.996595	487.789	17.1913	-36.8946	1.50389	12	no
LBT-2mm/s	2_39	488	46.4	81.6	7.24045e+17	6.64366	2.17881e+13	0.296396	549207	0.995966	487.998	17.2905	-36.9005	1.52012	12	no
LBT-2mm/s	2_40	488	45.1	74.8	6.63708e+17	6.61482	2.12822e+13	0.299918	539402	0.995157	488.167	17.4198	-36.9057	1.53436	12	no
LBT-2mm/s	2_41	488	46.8	78.1	6.92989e+17	6.62911	2.15317e+13	0.298165	544245	0.996187	488.255	17.5053	-36.9088	1.54284	12	no
LBT-2mm/s	2_42	488	48.5	81.3	7.21383e+17	6.64243	2.17665e+13	0.296544	548789	0.997002	488.311	17.5455	-36.9111	1.54906	12	no
LBT-2mm/s	2_43	488	49	78.4	6.95651e+17	6.63038	2.1554e+13	0.298009	544677	0.997207	488.349	17.5841	-36.913	1.55445	12	no
LBT-2mm/s	2_44	488	49.5	75.4	6.69032e+17	6.61746	2.13282e+13	0.299593	540295	0.997398	488.369	17.6148	-36.9142	1.55766	12	no
LBT-2mm/s	2_45	488	53.3	78.4	6.95651e+17	6.63038	2.1554e+13	0.298009	544677	0.998486	488.382	17.6376	-36.915	1.55998	12	no
LBT-2mm/s	2_46	488	57.1	81.4	7.22271e+17	6.64284	2.17737e+13	0.296495	548928	0.999123	488.389	17.6509	-36.9157	1.56171	12	no
LBT-2mm/s	2_47	488	58.6	75.2	6.67257e+17	6.61658	2.13129e+13	0.299701	539998	0.999294	488.394	17.6572	-36.9163	1.5634	12	no
LBT-2mm/s	2_48	488	60.1	68.9	6.11357e+17	6.5877	2.08153e+13	0.303289	530302	0.999432	488.396	17.6574	-36.9168	1.56485	12	no
LBT-2mm/s	2_49	488	58.6	75.2	6.67257e+17	6.61658	2.13129e+13	0.299701	539998	0.999294	488.397	17.6541	-36.9173	1.56631	12	no
LBT-2mm/s	2_50	488	57.1	81.4	7.22271e+17	6.64284	2.17737e+13	0.296495	548928	0.999123	488.395	17.6513	-36.9178	1.56769	12	no
LBT-2mm/s	2_51	488	53.3	78.4	6.95651e+17	6.63038	2.1554e+13	0.298009	544677	0.998486	488.393	17.6579	-36.9183	1.56892	12	no
LBT-2mm/s	2_52	488	49.5	75.4	6.69032e+17	6.61746	2.13282e+13	0.299593	540295	0.997398	488.389	17.67	-36.9186	1.5698	12	no
LBT-2mm/s	2_53	488	49	78.4	6.95651e+17	6.63038	2.1554e+13	0.298009	544677	0.997207	488.375	17.6822	-36.9191	1.57109	12	no
LBT-2mm/s	2_54	488	48.5	81.3	7.21383e+17	6.64243	2.17665e+13	0.296544	548789	0.997002	488.351	17.6581	-36.9195	1.57217	12	no
LBT-2mm/s	2_55	488	46.8	78.1	6.92989e+17	6.62911	2.15317e+13	0.298165	544245	0.996187	488.308	17.6164	-36.9196	1.57269	12	no
LBT-2mm/s	2_56	488	45.1	74.8	6.63708e+17	6.61482	2.12822e+13	0.299918	539402	0.995157	488.226	17.5735	-36.9192	1.57159	12	no
LBT-2mm/s	2_57	488	46.4	81.6	7.24045e+17	6.64366	2.17881e+13	0.296396	549207	0.995966	488.081	17.4767	-36.9181	1.56842	11	no
LBT-2mm/s	2_58	487	47.6	88.3	8.22281e+17	6.68606	2.25496e+13	0.291334	563864	0.996595	487.892	17.3521	-36.9163	1.5634	11	no
LBT-2mm/s	2_59	487	42.9	75.4	7.02152e+17	6.63347	2.16082e+13	0.297633	545727	0.99341	487.658	17.2448	-36.9137	1.55645	11	no
LBT-2mm/s	2_60	487	38.1	62.4	5.81091e+17	6.571	2.05319e+13	0.305395	524756	0.98718	487.396	17.1171	-36.9109	1.54857	11	no
LBT-2mm/s	2_61	487	46	70.6	6.57453e+17	6.61168	2.12279e+13	0.300305	538345	0.995733	487.101	17.0754	-36.9076	1.53951	11	no
LBT-2mm/s	2_62	486	53.8	78.8	7.70239e+17	6.66423	2.2155e+13	0.293923	556284	0.998591	486.787	17.0351	-36.9038	1.52924	11	no
LBT-2mm/s	2_63	486	40.8	61.1	5.97229e+17	6.58	2.06843e+13	0.304257	527741	0.991173	486.517	17.0051	-36.9005	1.52001	11	no
LBT-2mm/s	2_64	486	27.7	43.3	4.23241e+17	6.46768	1.88478e+13	0.318936	491406	0.947695	486.236	17.0054	-36.8968	1.5099	11	no
LBT-2mm/s	2_65	486	33.3	50.9	4.97528e+17	6.52018	1.9689e+13	0.311941	508149	0.975305	485.996	16.9905	-36.8929	1.49912	11	no
LBT-2mm/s	2_66	485	38.9	58.5	6.00275e+17	6.58168	2.07127e+13	0.304046	528297	0.988518	485.79	16.987	-36.8892	1.48887	11	no
LBT-2mm/s	2_67	485	34.6	59.5	6.10536e+17	6.58726	2.08077e+13	0.303345	530155	0.979301	485.65	17.0004	-36.886	1.48004	11	no
LBT-2mm/s	2_68	493	37.7	65.5	4.57317e+17	6.49277	1.9246e+13	0.315564	499354	0.986455	485.63	17.0024	-36.8854	1.47852	11	no
LBT-2mm/s	2_69	485	40.8	71.5	7.3367e+17	6.64805	2.18659e+13	0.295866	550711	0.991173	485.589	17.006	-36.8842	1.4753	12	no
LBT-2mm/s	2_70	485	44.8	79.1	8.11654e+17	6.68171	2.24705e+13	0.291847	562348	0.994949	485.542	17.0116	-36.8828	1.47146	12	no
LBT-2mm/s	2_71	485	48.8	86.7	8.89639e+17	6.71243	2.30341e+13	0.288252	573129	0.997126	485.479	17.0236	-36.8807	1.46543	12	no
LBT-2mm/s	2_72	485	49.7	88.9	9.12213e+17	6.72084	2.31904e+13	0.287279	576109	0.997471	485.455	17.0295	-36.8791	1.46108	12	no
LBT-2mm/s	2_73	485	50.5	91.1	9.34788e+17	6.72906	2.3344e+13	0.286334	579031	0.997743	485.452	17.0325	-36.8775	1.45689	12	no
LBT-2mm/s	2_74	485	49.1	84.6	8.6809e+17	6.7042	2.28821e+13	0.289208	570227	0.997246	485.462	17.0335	-36.8767	1.45447	12	no
LBT-2mm/s	2_75	485	47.7	78.1	8.01393e+17	6.67746	2.23935e+13	0.292349	560869	0.996642	485.47	17.0341	-36.8761	1.45301	12	no
LBT-2mm/s	2_76	485	52.6	83.4	8.55777e+17	6.69942	2.2794e+13	0.289766	568544	0.998327	485.507	17.036	-36.8742	1.44765	12	no
LBT-2mm/s	2_77	485	57.5	88.7	9.10161e+17	6.72009	2.31763e+13	0.287367	575840	0.999173	485.663	17.0132	-36.8704	1.43714	12	no
LBT-2mm/s	2_78	486	68.9	112.3	1.09769e+18	6.78333	2.43788e+13	0.280213	598604	0.999843	485.869	16.9904	-36.8671	1.42808	12	no
LBT-2mm/s	2_79	486	80.2	135.9	1.32837e+18	6.84833	2.56672e+13	0.273144	622702	0.999971	486.017	16.9733	-36.8646	1.42131	12	no
LBT-2mm/s	2_80	486	78.8	120.3	1.17589e+18	6.80671	2.4836e+13	0.277638	607189	0.999964	486.114	16.9643	-36.8622	1.41453	12	no
LBT-2mm/s	2_81	486	77.4	104.6	1.02242e+18	6.75928	2.39157e+13	0.2829	589870	0.999956	486.169	16.9591	-36.8603	1.40951	12	no
LBT-2mm/s	3_14	486	73.1	91.7	8.96332e+17	6.71494	2.30807e+13	0.287961	574019	0.999916	486.294	16.9516	-36.785	1.20227	9	no
LBT-2mm/s	3_15	486	63.7	79.8	7.80014e+17	6.66844	2.22306e+13	0.293421	557738	0.999664	486.235	16.9536	-36.7865	1.20643	11	no
LBT-2mm/s	3_16	486	59.3	84.6	8.26932e+17	6.68794	2.25839e+13	0.291112	564523	0.999362	486.177	16.9599	-36.7906	1.2177	12	no
LBT-2mm/s	3_17	486	54.8	89.3	8.72873e+17	6.70605	2.2916e+13	0.288993	570876	0.998779	486.091	16.9681	-36.795	1.22971	12	no
LBT-2mm/s	3_18	486	41.8	65.1	6.36327e+17	6.6009	2.10415e+13	0.301641	534717	0.992318	485.962	16.9823	-36.8	1.24344	12	no
LBT-2mm/s	3_19	485	28.8	40.9	4.1968e+17	6.46494	1.88049e+13	0.319307	490547	0.954803	485.773	17.0108	-36.8053	1.25819	11	no
LBT-2mm/s	3_20	485	25.9	37.3	3.8274e+17	6.43523	1.83429e+13	0.32338	481269	0.933673	485.576	17.0361	-36.8118	1.27606	11	no
LBT-2mm/s	3_21	485	22.9	33.7	3.458e+17	6.40266	1.7847e+13	0.327939	471249	0.901914	485.513	17.0416	-36.8145	1.28352	11	no
LBT-2mm/s	3_22	485	23.5	36.2	3.71452e+17	6.42561	1.81952e+13	0.324717	478292	0.909253	485.499	17.0421	-36.8155	1.28622	11	no
LBT-2mm/s	3_23	485	24.1	38.7	3.97105e+17	6.4471	1.85262e+13	0.321744	484958	0.916063	485.479	17.04	-36.8176	1.29208	11	no
LBT-2mm/s	3_24	485	24.7	41.2	4.22758e+17	6.46731	1.8842e+13	0.318986	491290	0.922381	485.465	17.0353	-36.8205	1.29993	11	no
LBT-2mm/s	3_25	485	25.3	43.7	4.48411e+17	6.48639	1.91441e+13	0.316416	497324	0.928241	485.455	17.0309	-36.8246	1.31132	11	no
LBT-2mm/s	3_26	485	18.4	29.3	3.00651e+17	6.35802	1.71854e+13	0.334348	457775	0.825764	485.475	17.0228	-36.8274	1.31884	11	no
LBT-2mm/s	3_27	485	11.4	14.8	1.51864e+17	6.14457	1.42914e+13	0.367836	397272	0.590231	485.509	17.0131	-36.8302	1.32649	11	no
LBT-2mm/s	3_28	493	11.3	15	1.04729e+17	6.03146	1.29271e+13	0.387715	367735	0.585379	485.534	17.0088	-36.8318	1.33096	11	no
LBT-2mm/s	3_29	485	11.1	15.1	1.54943e+17	6.15074	1.43691e+13	0.366797	398932	0.575522	485.55	17.0066	-36.8327	1.33363	11	no
LBT-2mm/s	3_30	485	11.2	15.2	1.55969e+17	6.15277	1.43947e+13	0.366456	399479	0.580476	485.7	16.9954	-36.8397	1.35285	11	no
LBT-2mm/s	3_31	486	11.4	15.4	1.50529e+17	6.14186	1.42574e+13	0.368294	396544	0.590231	485.886	16.9851	-36.8469	1.37253	11	no
LBT-2mm/s	3_32	486	11.6	15.6	1.52484e+17	6.14582	1.43072e+13	0.367625	397608	0.599783	486.105	16.9842	-36.854	1.39214	11	no
LBT-2mm/s	3_33	486	12.2	16.1	1.57371e+17	6.15553	1.44295e+13	0.365995	400223	0.627257	486.365	16.9834	-36.861	1.41133	12	no
LBT-2mm/s	3_34	486	12.8	16.6	1.62259e+17	6.16495	1.45492e+13	0.364422	402774	0.653021	486.642	16.9891	-36.8681	1.43101	12	no
LBT-2mm/s	3_35	487	17.2	24.6	2.29084e+17	6.27218	1.59691e+13	0.347229	432673	0.797497	486.954	16.9992	-36.8749	1.44968	12	no
LBT-2mm/s	3_36	487	21.5	32.6	3.03583e+17	6.36111	1.72305e+13	0.333899	458698	0.882517	487.26	17.0335	-36.8817	1.46835	12	no
LBT-2mm/s	3_37	487	26.7	43.5	4.05088e+17	6.45352	1.86261e+13	0.320864	486962	0.940303	487.54	17.1078	-36.8883	1.48657	12	no
LBT-2mm/s	3_38	487	31.8	54.4	5.06592e+17	6.52607	1.97852e+13	0.311171	510053	0.969758	487.791	17.1881	-36.8946	1.50372	12	no
LBT-2mm/s	3_39	488	26.9	41.9	3.71783e+17	6.42589	1.81996e+13	0.324677	478380	0.941858	488.001	17.2982	-36.9004	1.51977	12	no
LBT-2mm/s	3_40	488	21.9	29.4	2.60869e+17	6.31306	1.65393e+13	0.341001	444496	0.888404	488.169	17.4256	-36.9055	1.53388	12	no
LBT-2mm/s	3_41	488	22.5	27.8	2.46672e+17	6.29542	1.62913e+13	0.343667	439366	0.896709	488.256	17.5131	-36.9086	1.54222	12	no
LBT-2mm/s	3_42	488	23.1	26.1	2.31588e+17	6.27559	1.60161e+13	0.346703	433650	0.904421	488.311	17.5545	-36.9108	1.54835	12	no
LBT-2mm/s	3_43	488	26.3	28.2	2.50221e+17	6.29992	1.63542e+13	0.342984	440670	0.937072	488.35	17.5936	-36.9127	1.55367	12	no
LBT-2mm/s	3_44	488	29.4	30.3	2.68855e+17	6.32259	1.66745e+13	0.339575	447285	0.958277	488.37	17.6264	-36.9139	1.55687	12	no
LBT-2mm/s	3_45	488	32.5	28.6	2.53771e+17	6.30436	1.64166e+13	0.342312	441959	0.972483	488.382	17.6503	-36.9147	1.55918	12	no
LBT-2mm/s	3_46	488	35.5	26.8	2.37799e+17	6.2839	1.61309e+13	0.345426	436039	0.98169	488.389	17.6638	-36.9154	1.5609	12	no
LBT-2mm/s	3_47	488	38.3	26.4	2.3425e+17	6.27918	1.60656e+13	0.34615	434680	0.987528	488.394	17.6712	-36.916	1.56255	12	no
LBT-2mm/s	3_48	488	41.1	25.9	2.29813e+17	6.27318	1.59829e+13	0.347075	432959	0.991533	488.397	17.6729	-36.9165	1.56395	12	no
LBT-2mm/s	3_49	488	38.3	26.4	2.3425e+17	6.27918	1.60656e+13	0.34615	434680	0.987528	488.397	17.6706	-36.917	1.56536	12	no
LBT-2mm/s	3_50	488	35.5	26.8	2.37799e+17	6.2839	1.61309e+13	0.345426	436039	0.98169	488.395	17.6674	-36.9175	1.56669	12	no
LBT-2mm/s	3_51	488	32.5	28.6	2.53771e+17	6.30436	1.64166e+13	0.342312	441959	0.972483	488.392	17.6705	-36.9179	1.56792	12	no
LBT-2mm/s	3_52	488	29.4	30.3	2.68855e+17	6.32259	1.66745e+13	0.339575	447285	0.958277	488.388	17.6802	-36.9182	1.56882	12	no
LBT-2mm/s	3_53	488	26.3	28.2	2.50221e+17	6.29992	1.63542e+13	0.342984	440670	0.937072	488.374	17.6962	-36.9187	1.57015	12	no
LBT-2mm/s	3_54	488	23.1	26.1	2.31588e+17	6.27559	1.60161e+13	0.346703	433650	0.904421	488.35	17.6775	-36.9191	1.57125	12	no
LBT-2mm/s	3_55	488	22.5	27.8	2.46672e+17	6.29542	1.62913e+13	0.343667	439366	0.896709	488.308	17.6266	-36.9193	1.57187	12	no
LBT-2mm/s	3_56	488	21.9	29.4	2.60869e+17	6.31306	1.65393e+13	0.341001	444496	0.888404	488.225	17.5756	-36.919	1.57088	12	no
LBT-2mm/s	3_57	488	26.9	41.9	3.71783e+17	6.42589	1.81996e+13	0.324677	478380	0.941858	488.082	17.4807	-36.9179	1.56791	12	no
LBT-2mm/s	3_58	487	31.8	54.4	5.06592e+17	6.52607	1.97852e+13	0.311171	510053	0.969758	487.894	17.348	-36.9161	1.56299	12	no
LBT-2mm/s	3_59	487	26.7	43.5	4.05088e+17	6.45352	1.86261e+13	0.320864	486962	0.940303	487.661	17.2427	-36.9137	1.55621	12	no
LBT-2mm/s	3_60	487	21.5	32.6	3.03583e+17	6.36111	1.72305e+13	0.333899	458698	0.882517	487.401	17.1175	-36.9108	1.54844	12	no
LBT-2mm/s	3_61	487	17.2	24.6	2.29084e+17	6.27218	1.59691e+13	0.347229	432673	0.797497	487.106	17.0709	-36.9076	1.53943	12	no
LBT-2mm/s	3_62	486	12.8	16.6	1.62259e+17	6.16495	1.45492e+13	0.364422	402774	0.653021	486.789	17.0339	-36.9038	1.52923	11	no
LBT-2mm/s	3_63	486	12.2	16.1	1.57371e+17	6.15553	1.44295e+13	0.365995	400223	0.627257	486.524	17.0032	-36.9005	1.51999	11	no
LBT-2mm/s	3_64	486	11.6	15.6	1.52484e+17	6.14582	1.43072e+13	0.367625	397608	0.599783	486.242	17.0045	-36.8969	1.50999	11	no
LBT-2mm/s	3_65	486	11.4	15.4	1.50529e+17	6.14186	1.42574e+13	0.368294	396544	0.590231	486.008	16.9889	-36.8929	1.49907	11	no
LBT-2mm/s	3_66	485	11.2	15.2	1.55969e+17	6.15277	1.43947e+13	0.366456	399479	0.580476	485.801	16.9863	-36.8892	1.48897	11	no
LBT-2mm/s	3_67	485	11.1	15.1	1.54943e+17	6.15074	1.43691e+13	0.366797	398932	0.575522	485.658	16.9983	-36.886	1.48001	11	no
LBT-2mm/s	3_68	493	11.3	15	1.04729e+17	6.03146	1.29271e+13	0.387715	367735	0.585379	485.637	17.0003	-36.8854	1.47845	11	no
LBT-2mm/s	3_69	485	11.4	14.8	1.51864e+17	6.14457	1.42914e+13	0.367836	397272	0.590231	485.596	17.0042	-36.8842	1.4752	11	no
LBT-2mm/s	3_70	485	18.4	29.3	3.00651e+17	6.35802	1.71854e+13	0.334348	457775	0.825764	485.55	17.0102	-36.8828	1.47144	12	no
LBT-2mm/s	3_71	485	25.3	43.7	4.48411e+17	6.48639	1.91441e+13	0.316416	497324	0.928241	485.491	17.0222	-36.8807	1.46555	12	no
LBT-2mm/s	3_72	485	24.7	41.2	4.22758e+17	6.46731	1.8842e+13	0.318986	491290	0.922381	485.467	17.0287	-36.8791	1.46115	12	no
LBT-2mm/s	3_73	485	24.1	38.7	3.97105e+17	6.4471	1.85262e+13	0.321744	484958	0.916063	485.463	17.0321	-36.8776	1.45693	12	no
LBT-2mm/s	3_74	485	23.5	36.2	3.71452e+17	6.42561	1.81952e+13	0.324717	478292	0.909253	485.47	17.0335	-36.8767	1.4545	12	no
LBT-2mm/s	3_75	485	22.9	33.7	3.458e+17	6.40266	1.7847e+13	0.327939	471249	0.901914	485.478	17.0344	-36.8762	1.45306	12	no
LBT-2mm/s	3_76	485	25.9	37.3	3.8274e+17	6.43523	1.83429e+13	0.32338	481269	0.933673	485.516	17.0357	-36.8742	1.44772	12	no
LBT-2mm/s	3_77	485	28.8	40.9	4.1968e+17	6.46494	1.88049e+13	0.319307	490547	0.954803	485.667	17.0115	-36.8703	1.43696	12	no
LBT-2mm/s	3_78	486	41.8	65.1	6.36327e+17	6.6009	2.10415e+13	0.301641	534717	0.992318	485.872	16.9897	-36.867	1.42797	12	no
LBT-2mm/s	3_79	486	54.8	89.3	8.72873e+17	6.70605	2.2916e+13	0.288993	570876	0.998779	486.018	16.9729	-36.8646	1.42121	12	no
LBT-2mm/s	3_80	486	59.3	84.6	8.26932e+17	6.68794	2.25839e+13	0.291112	564523	0.999362	486.112	16.9638	-36.8618	1.41368	13	no
LBT-2mm/s	3_81	486	63.7	79.8	7.80014e+17	6.66844	2.22306e+13	0.293421	557738	0.999664	486.165	16.9585	-36.8594	1.40707	13	no
LBT-2mm/s	3_82	486	73.1	91.7	8.96332e+17	6.71494	2.30807e+13	0.287961	574019	0.999916	486.207	16.9561	-36.8585	1.40456	310	yes
LBT-2mm/s	4_13	486	67.3	84.4	8.24977e+17	6.68715	2.25695e+13	0.291205	564247	0.999802	486.333	16.9494	-36.7829	1.19653	11	no
LBT-2mm/s	4_14	486	52.7	64.2	6.2753e+17	6.5963	2.09626e+13	0.302213	533178	0.998351	486.28	16.9503	-36.7832	1.19728	11	no
LBT-2mm/s	4_15	486	38.1	43.9	4.29105e+17	6.47213	1.8918e+13	0.318334	492810	0.98718	486.233	16.9533	-36.7859	1.20483	12	no
LBT-2mm/s	4_16	486	25.8	28.9	2.82486e+17	6.33824	1.68987e+13	0.33725	451897	0.932796	486.181	16.9602	-36.7909	1.21837	13	no
LBT-2mm/s	4_17	486	13.5	13.8	1.3489e+17	6.10826	1.38413e+13	0.374043	387606	0.68103	486.091	16.9678	-36.7952	1.23034	14	no
LBT-2mm/s	4_18	486	12.6	13.6	1.32935e+17	6.10381	1.37869e+13	0.374816	386431	0.644618	485.968	16.9807	-36.8003	1.24426	14	no
LBT-2mm/s	4_19	485	11.6	13.4	1.37499e+17	6.11412	1.39131e+13	0.373032	389152	0.599783	485.783	17.0083	-36.8055	1.25872	15	no
LBT-2mm/s	4_20	485	11.4	13.5	1.38525e+17	6.11639	1.39411e+13	0.37264	389754	0.590231	485.595	17.0336	-36.812	1.27658	16	no
LBT-2mm/s	4_21	485	11.1	13.6	1.39551e+17	6.11865	1.39689e+13	0.372252	390353	0.575522	485.532	17.0396	-36.8147	1.28395	16	no
LBT-2mm/s	4_22	485	11.2	13.8	1.41603e+17	6.12312	1.4024e+13	0.371485	391539	0.580476	485.517	17.0406	-36.8157	1.28668	16	no
LBT-2mm/s	4_23	485	11.2	13.9	1.42629e+17	6.12533	1.40514e+13	0.371106	392127	0.580476	485.495	17.0393	-36.8178	1.29253	16	no
LBT-2mm/s	4_24	485	11.5	14.9	1.52891e+17	6.14664	1.43175e+13	0.367487	397828	0.595032	485.483	17.0337	-36.8206	1.30031	16	no
LBT-2mm/s	4_25	485	11.7	15.9	1.63152e+17	6.16664	1.45708e+13	0.364141	403233	0.604484	485.478	17.0286	-36.8248	1.31166	16	no
LBT-2mm/s	4_26	485	9.8	13.1	1.34421e+17	6.1072	1.38283e+13	0.374228	387325	0.506277	485.497	17.0208	-36.8275	1.31918	16	no
LBT-2mm/s	4_27	485	7.9	10.2	1.04663e+17	6.03127	1.29249e+13	0.38775	367687	0.387822	485.531	17.0106	-36.8303	1.3269	16	no
LBT-2mm/s	4_28	493	8	10.4	7.26121e+16	5.92201	1.171e+13	0.408558	340738	0.394591	485.555	17.0065	-36.8319	1.33131	16	no
LBT-2mm/s	4_29	485	8.1	10.5	1.07742e+17	6.04002	1.30265e+13	0.386154	369911	0.4013	485.572	17.0047	-36.8329	1.33392	16	no
LBT-2mm/s	4_30	485	7.9	10.3	1.05689e+17	6.03421	1.2959e+13	0.387212	368434	0.387822	485.718	16.9945	-36.8399	1.35319	16	no
LBT-2mm/s	4_31	486	8.4	10.9	1.06543e+17	6.03664	1.29872e+13	0.386769	369051	0.421065	485.904	16.9834	-36.847	1.37284	15	no
LBT-2mm/s	4_32	486	8.9	11.5	1.12408e+17	6.05283	1.31764e+13	0.383834	373187	0.452813	486.125	16.9818	-36.8541	1.39245	15	no
LBT-2mm/s	4_33	486	9.3	11.9	1.16318e+17	6.06319	1.32986e+13	0.381975	375851	0.477152	486.373	16.981	-36.8611	1.41161	15	no
LBT-2mm/s	4_34	486	9.6	12.3	1.20228e+17	6.07322	1.34179e+13	0.380188	378443	0.494798	486.657	16.9866	-36.8683	1.43132	14	no
LBT-2mm/s	4_35	487	10.4	13.1	1.21992e+17	6.07765	1.34708e+13	0.379404	379592	0.539373	486.963	16.9961	-36.875	1.44995	14	no
LBT-2mm/s	4_36	487	11.1	13.9	1.29442e+17	6.09569	1.36881e+13	0.376231	384299	0.575522	487.263	17.0304	-36.8818	1.46858	14	no
LBT-2mm/s	4_37	487	12.2	14.1	1.31304e+17	6.10004	1.3741e+13	0.375471	385441	0.627257	487.545	17.1036	-36.8884	1.48679	13	no
LBT-2mm/s	4_38	487	13.2	14.3	1.33167e+17	6.10434	1.37934e+13	0.374724	386572	0.669289	487.793	17.1817	-36.8946	1.50382	13	no
LBT-2mm/s	4_39	488	13	13.2	1.17125e+17	6.06529	1.33235e+13	0.381601	376391	0.661244	488.003	17.3021	-36.9004	1.5197	13	no
LBT-2mm/s	4_40	488	12.7	12.1	1.07365e+17	6.03896	1.30141e+13	0.386347	369641	0.648842	488.169	17.4295	-36.9055	1.53369	13	no
LBT-2mm/s	4_41	488	13.7	11.6	1.02928e+17	6.02623	1.28667e+13	0.388674	366410	0.688645	488.256	17.5198	-36.9084	1.54189	12	no
LBT-2mm/s	4_42	488	14.6	11.1	9.84914e+16	6.01297	1.27145e+13	0.391121	363066	0.72089	488.31	17.5618	-36.9106	1.54786	12	no
LBT-2mm/s	4_43	488	17.5	11.8	1.04703e+17	6.03138	1.29262e+13	0.387729	367716	0.804943	488.35	17.6	-36.9125	1.55313	12	no
LBT-2mm/s	4_44	488	20.4	12.4	1.10026e+17	6.04636	1.31005e+13	0.385004	371529	0.864762	488.369	17.6346	-36.9137	1.55632	12	no
LBT-2mm/s	4_45	488	23.6	12.1	1.07365e+17	6.03896	1.30141e+13	0.386347	369641	0.910423	488.382	17.6604	-36.9145	1.55864	12	no
LBT-2mm/s	4_46	488	26.8	11.7	1.03815e+17	6.02882	1.28965e+13	0.388199	367065	0.941085	488.388	17.6742	-36.9151	1.56033	12	no
LBT-2mm/s	4_47	488	31	11.7	1.03815e+17	6.02882	1.28965e+13	0.388199	367065	0.966322	488.393	17.6832	-36.9157	1.56194	12	no
LBT-2mm/s	4_48	488	35.1	11.6	1.02928e+17	6.02623	1.28667e+13	0.388674	366410	0.980664	488.396	17.6874	-36.9162	1.56331	12	no
LBT-2mm/s	4_49	488	31	11.7	1.03815e+17	6.02882	1.28965e+13	0.388199	367065	0.966322	488.397	17.6864	-36.9167	1.56466	12	no
LBT-2mm/s	4_50	488	26.8	11.7	1.03815e+17	6.02882	1.28965e+13	0.388199	367065	0.941085	488.395	17.6823	-36.9172	1.56594	12	no
LBT-2mm/s	4_51	488	23.6	12.1	1.07365e+17	6.03896	1.30141e+13	0.386347	369641	0.910423	488.392	17.6814	-36.9176	1.56718	12	no
LBT-2mm/s	4_52	488	20.4	12.4	1.10026e+17	6.04636	1.31005e+13	0.385004	371529	0.864762	488.387	17.688	-36.918	1.56812	12	no
LBT-2mm/s	4_53	488	17.5	11.8	1.04703e+17	6.03138	1.29262e+13	0.387729	367716	0.804943	488.373	17.7084	-36.9185	1.56947	12	no
LBT-2mm/s	4_54	488	14.6	11.1	9.84914e+16	6.01297	1.27145e+13	0.391121	363066	0.72089	488.349	17.6947	-36.9189	1.57059	12	no
LBT-2mm/s	4_55	488	13.7	11.6	1.02928e+17	6.02623	1.28667e+13	0.388674	366410	0.688645	488.307	17.6342	-36.9191	1.57131	12	no
LBT-2mm/s	4_56	488	12.7	12.1	1.07365e+17	6.03896	1.30141e+13	0.386347	369641	0.648842	488.223	17.5757	-36.9188	1.57039	12	no
LBT-2mm/s	4_57	488	13	13.2	1.17125e+17	6.06529	1.33235e+13	0.381601	376391	0.661244	488.083	17.4829	-36.9178	1.5676	13	no
LBT-2mm/s	4_58	487	13.2	14.3	1.33167e+17	6.10434	1.37934e+13	0.374724	386572	0.669289	487.897	17.3424	-36.9161	1.56287	13	no
LBT-2mm/s	4_59	487	12.2	14.1	1.31304e+17	6.10004	1.3741e+13	0.375471	385441	0.627257	487.664	17.239	-36.9137	1.55629	13	no
LBT-2mm/s	4_60	487	11.1	13.9	1.29442e+17	6.09569	1.36881e+13	0.376231	384299	0.575522	487.407	17.1162	-36.9109	1.54858	13	no
LBT-2mm/s	4_61	487	10.4	13.1	1.21992e+17	6.07765	1.34708e+13	0.379404	379592	0.539373	487.115	17.0659	-36.9076	1.53968	13	no
LBT-2mm/s	4_62	486	9.6	12.3	1.20228e+17	6.07322	1.34179e+13	0.380188	378443	0.494798	486.796	17.0313	-36.9039	1.52947	13	no
LBT-2mm/s	4_63	486	9.3	11.9	1.16318e+17	6.06319	1.32986e+13	0.381975	375851	0.477152	486.537	17.0007	-36.9006	1.52026	15	no
LBT-2mm/s	4_64	486	8.9	11.5	1.12408e+17	6.05283	1.31764e+13	0.383834	373187	0.452813	486.257	17.0021	-36.8969	1.51025	16	no
LBT-2mm/s	4_65	486	8.4	10.9	1.06543e+17	6.03664	1.29872e+13	0.386769	369051	0.421065	486.026	16.9871	-36.893	1.49937	16	no
LBT-2mm/s	4_66	485	7.9	10.3	1.05689e+17	6.03421	1.2959e+13	0.387212	368434	0.387822	485.819	16.9855	-36.8893	1.48929	16	no
LBT-2mm/s	4_67	485	8.1	10.5	1.07742e+17	6.04002	1.30265e+13	0.386154	369911	0.4013	485.674	16.9961	-36.8861	1.48031	16	no
LBT-2mm/s	4_68	493	8	10.4	7.26121e+16	5.92201	1.171e+13	0.408558	340738	0.394591	485.653	16.9979	-36.8855	1.47876	16	no
LBT-2mm/s	4_69	485	7.9	10.2	1.04663e+17	6.03127	1.29249e+13	0.38775	367687	0.387822	485.612	17.0021	-36.8843	1.47553	16	no
LBT-2mm/s	4_70	485	9.8	13.1	1.34421e+17	6.1072	1.38283e+13	0.374228	387325	0.506277	485.566	17.0084	-36.8829	1.47174	16	no
LBT-2mm/s	4_71	485	11.7	15.9	1.63152e+17	6.16664	1.45708e+13	0.364141	403233	0.604484	485.51	17.0203	-36.8808	1.46587	16	no
LBT-2mm/s	4_72	485	11.5	14.9	1.52891e+17	6.14664	1.43175e+13	0.367487	397828	0.595032	485.488	17.0273	-36.8792	1.46149	16	no
LBT-2mm/s	4_73	485	11.2	13.9	1.42629e+17	6.12533	1.40514e+13	0.371106	392127	0.580476	485.481	17.0309	-36.8777	1.45736	16	no
LBT-2mm/s	4_74	485	11.2	13.8	1.41603e+17	6.12312	1.4024e+13	0.371485	391539	0.580476	485.486	17.0323	-36.8768	1.45491	16	no
LBT-2mm/s	4_75	485	11.1	13.6	1.39551e+17	6.11865	1.39689e+13	0.372252	390353	0.575522	485.492	17.0332	-36.8763	1.45345	16	no
LBT-2mm/s	4_76	485	11.4	13.5	1.38525e+17	6.11639	1.39411e+13	0.37264	389754	0.590231	485.532	17.0339	-36.8744	1.44814	16	no
LBT-2mm/s	4_77	485	11.6	13.4	1.37499e+17	6.11412	1.39131e+13	0.373032	389152	0.599783	485.678	17.0098	-36.8705	1.43739	15	no
LBT-2mm/s	4_78	486	12.6	13.6	1.32935e+17	6.10381	1.37869e+13	0.374816	386431	0.644618	485.879	16.989	-36.8673	1.42873	15	no
LBT-2mm/s	4_79	486	13.5	13.8	1.3489e+17	6.10826	1.38413e+13	0.374043	387606	0.68103	486.022	16.9728	-36.8649	1.42211	15	no
LBT-2mm/s	4_80	486	25.8	28.9	2.82486e+17	6.33824	1.68987e+13	0.33725	451897	0.932796	486.114	16.9638	-36.8621	1.41433	15	no
LBT-2mm/s	4_81	486	38.1	43.9	4.29105e+17	6.47213	1.8918e+13	0.318334	492810	0.98718	486.17	16.9585	-36.8594	1.40705	15	no
LBT-2mm/s	4_82	486	52.7	64.2	6.2753e+17	6.5963	2.09626e+13	0.302213	533178	0.998351	486.208	16.9556	-36.8579	1.40282	13	no
LBT-2mm/s	4_83	486	67.3	84.4	8.24977e+17	6.68715	2.25695e+13	0.291205	564247	0.999802	486.239	16.9536	-36.8569	1.40008	13	no
LBT-2mm/s	5_12	486	65.6	77.8	7.60465e+17	6.65998	2.20787e+13	0.294431	554816	0.999745	486.369	16.9474	-36.781	1.19117	9	no
LBT-2mm/s	5_13	486	41.6	47.6	4.65271e+17	6.49837	1.93359e+13	0.314818	501142	0.992102	486.317	16.9477	-36.7808	1.1906	9	no
LBT-2mm/s	5_14	486	28.9	31.1	3.0399e+17	6.36153	1.72367e+13	0.333837	458825	0.955401	486.283	16.9496	-36.7827	1.19599	9	no
LBT-2mm/s	5_15	486	16.1	14.6	1.42709e+17	6.1255	1.40535e+13	0.371077	392172	0.767856	486.245	16.9535	-36.7864	1.20605	13	no
LBT-2mm/s	5_16	486	13.4	12.7	1.24138e+17	6.08295	1.35343e+13	0.378467	380970	0.677159	486.19	16.961	-36.7917	1.22072	14	no
LBT-2mm/s	5_17	486	10.6	10.8	1.05566e+17	6.03386	1.29549e+13	0.387276	368344	0.549968	486.092	16.968	-36.7957	1.23172	15	no
LBT-2mm/s	5_18	486	9.6	10.2	9.9701e+16	6.01664	1.27565e+13	0.390441	363990	0.494798	485.967	16.9801	-36.8004	1.24457	17	no
LBT-2mm/s	5_19	485	8.5	9.6	9.85067e+16	6.01301	1.27151e+13	0.391112	363078	0.427534	485.794	17.0053	-36.8057	1.25917	18	no
LBT-2mm/s	5_20	485	8.4	9.6	9.85067e+16	6.01301	1.27151e+13	0.391112	363078	0.421065	485.618	17.0287	-36.8121	1.27674	19	no
LBT-2mm/s	5_21	485	8.2	9.6	9.85067e+16	6.01301	1.27151e+13	0.391112	363078	0.407949	485.56	17.0346	-36.8148	1.28424	16	no
LBT-2mm/s	5_22	485	8.2	9.7	9.95328e+16	6.01613	1.27507e+13	0.390535	363862	0.407949	485.545	17.0359	-36.8158	1.28695	16	no
LBT-2mm/s	5_23	485	8.1	9.8	1.00559e+17	6.01922	1.27861e+13	0.389965	364639	0.4013	485.523	17.0356	-36.8179	1.2928	16	no
LBT-2mm/s	5_24	485	8.2	10	1.02611e+17	6.0253	1.2856e+13	0.388844	366175	0.407949	485.511	17.0314	-36.8207	1.30042	16	no
LBT-2mm/s	5_25	485	8.2	10.2	1.04663e+17	6.03127	1.29249e+13	0.38775	367687	0.407949	485.511	17.0252	-36.8248	1.3117	16	no
LBT-2mm/s	5_26	485	7.2	9.2	9.44023e+16	6.00023	1.25698e+13	0.393493	359876	0.338748	485.531	17.0186	-36.8276	1.31939	16	no
LBT-2mm/s	5_27	485	6.1	8.1	8.3115e+16	5.96212	1.2145e+13	0.40072	350462	0.255729	485.565	17.01	-36.8304	1.32717	16	no
LBT-2mm/s	5_28	493	6	7.9	5.51573e+16	5.84112	1.08722e+13	0.425077	321757	0.247838	485.589	17.0059	-36.832	1.33161	16	no
LBT-2mm/s	5_29	485	5.9	7.7	7.90106e+16	5.94703	1.198e+13	0.403637	346785	0.239892	485.606	17.0038	-36.833	1.33425	18	no
LBT-2mm/s	5_30	485	5.9	7.6	7.79845e+16	5.94314	1.19378e+13	0.404395	345842	0.239892	485.748	16.9927	-36.8399	1.35334	18	no
LBT-2mm/s	5_31	486	6.1	7.9	7.72194e+16	5.94023	1.19061e+13	0.404967	345133	0.255729	485.934	16.9816	-36.8471	1.37308	18	no
LBT-2mm/s	5_32	486	6.3	8.1	7.91743e+16	5.94767	1.19867e+13	0.403518	346935	0.271345	486.152	16.9775	-36.8542	1.39257	17	no
LBT-2mm/s	5_33	486	6.9	8.7	8.50391e+16	5.96897	1.22202e+13	0.39941	352136	0.316812	486.393	16.9771	-36.8612	1.41181	17	no
LBT-2mm/s	5_34	486	7.4	9.2	8.99264e+16	5.98567	1.2406e+13	0.396231	356256	0.353071	486.679	16.9816	-36.8683	1.43141	16	no
LBT-2mm/s	5_35	487	7.8	9.3	8.6605e+16	5.97442	1.22806e+13	0.398369	353476	0.380993	486.977	16.9917	-36.8751	1.4502	16	no
LBT-2mm/s	5_36	487	8.1	9.4	8.75362e+16	5.97762	1.23161e+13	0.39776	354264	0.4013	487.269	17.0259	-36.8818	1.46872	15	no
LBT-2mm/s	5_37	487	8.8	9.6	8.93987e+16	5.98392	1.23863e+13	0.396565	355820	0.446582	487.548	17.0995	-36.8884	1.48688	15	no
LBT-2mm/s	5_38	487	9.4	9.8	9.12611e+16	5.99009	1.24555e+13	0.395399	357351	0.483092	487.793	17.1707	-36.8946	1.50388	14	no
LBT-2mm/s	5_39	488	9.3	9	7.98579e+16	5.95024	1.20146e+13	0.403021	347557	0.477152	488.001	17.2932	-36.9003	1.51958	13	no
LBT-2mm/s	5_40	488	9.1	8.1	7.18721e+16	5.91898	1.16776e+13	0.40916	340012	0.465099	488.166	17.43	-36.9054	1.5334	13	no
LBT-2mm/s	5_41	488	10.2	7.9	7.00975e+16	5.91159	1.15991e+13	0.410633	338245	0.528562	488.25	17.5226	-36.9083	1.54145	12	no
LBT-2mm/s	5_42	488	11.3	7.7	6.83229e+16	5.90401	1.1519e+13	0.41215	336443	0.585379	488.304	17.5663	-36.9104	1.54733	12	no
LBT-2mm/s	5_43	488	13.6	8.2	7.27594e+16	5.92261	1.17164e+13	0.40844	340882	0.684859	488.344	17.6003	-36.9123	1.55255	12	no
LBT-2mm/s	5_44	488	15.8	8.7	7.7196e+16	5.94017	11905113315707	0.404984	345111	0.759096	488.364	17.6336	-36.9135	1.55573	12	no
LBT-2mm/s	5_45	488	17.6	8.4	7.45341e+16	5.92975	1.17928e+13	0.407029	342598	0.807367	488.376	17.6605	-36.9143	1.55804	12	no
LBT-2mm/s	5_46	488	19.3	8.1	7.18721e+16	5.91898	1.16776e+13	0.40916	340012	0.844474	488.383	17.6769	-36.9149	1.55973	12	no
LBT-2mm/s	5_47	488	24	8	7.09848e+16	5.91531	1.16385e+13	0.409891	339133	0.914963	488.388	17.6887	-36.9155	1.56132	12	no
LBT-2mm/s	5_48	488	28.7	7.9	7.00975e+16	5.91159	1.15991e+13	0.410633	338245	0.954198	488.391	17.6952	-36.916	1.56264	12	no
LBT-2mm/s	5_49	488	24	8	7.09848e+16	5.91531	1.16385e+13	0.409891	339133	0.914963	488.392	17.697	-36.9165	1.56395	12	no
LBT-2mm/s	5_50	488	19.3	8.1	7.18721e+16	5.91898	1.16776e+13	0.40916	340012	0.844474	488.391	17.6943	-36.9169	1.56522	12	no
LBT-2mm/s	5_51	488	17.6	8.4	7.45341e+16	5.92975	1.17928e+13	0.407029	342598	0.807367	488.389	17.6916	-36.9174	1.56648	12	no
LBT-2mm/s	5_52	488	15.8	8.7	7.7196e+16	5.94017	11905113315707	0.404984	345111	0.759096	488.384	17.6952	-36.9177	1.56745	12	no
LBT-2mm/s	5_53	488	13.6	8.2	7.27594e+16	5.92261	1.17164e+13	0.40844	340882	0.684859	488.37	17.7124	-36.9182	1.56884	12	no
LBT-2mm/s	5_54	488	11.3	7.7	6.83229e+16	5.90401	1.1519e+13	0.41215	336443	0.585379	488.347	17.6985	-36.9187	1.56999	12	no
LBT-2mm/s	5_55	488	10.2	7.9	7.00975e+16	5.91159	1.15991e+13	0.410633	338245	0.528562	488.303	17.6349	-36.9189	1.57071	13	no
LBT-2mm/s	5_56	488	9.1	8.1	7.18721e+16	5.91898	1.16776e+13	0.40916	340012	0.465099	488.219	17.5741	-36.9186	1.56988	13	no
LBT-2mm/s	5_57	488	9.3	9	7.98579e+16	5.95024	1.20146e+13	0.403021	347557	0.477152	488.08	17.4813	-36.9176	1.5672	13	no
LBT-2mm/s	5_58	487	9.4	9.8	9.12611e+16	5.99009	1.24555e+13	0.395399	357351	0.483092	487.896	17.3372	-36.916	1.56272	13	no
LBT-2mm/s	5_59	487	8.8	9.6	8.93987e+16	5.98392	1.23863e+13	0.396565	355820	0.446582	487.666	17.2298	-36.9137	1.55626	14	no
LBT-2mm/s	5_60	487	8.1	9.4	8.75362e+16	5.97762	1.23161e+13	0.39776	354264	0.4013	487.413	17.1109	-36.9109	1.54869	14	no
LBT-2mm/s	5_61	487	7.8	9.3	8.6605e+16	5.97442	1.22806e+13	0.398369	353476	0.380993	487.127	17.0603	-36.9077	1.53987	14	no
LBT-2mm/s	5_62	486	7.4	9.2	8.99264e+16	5.98567	1.2406e+13	0.396231	356256	0.353071	486.811	17.0252	-36.904	1.52961	14	no
LBT-2mm/s	5_63	486	6.9	8.7	8.50391e+16	5.96897	1.22202e+13	0.39941	352136	0.316812	486.557	16.9972	-36.9007	1.52046	15	no
LBT-2mm/s	5_64	486	6.3	8.1	7.91743e+16	5.94767	1.19867e+13	0.403518	346935	0.271345	486.287	16.997	-36.897	1.5103	17	no
LBT-2mm/s	5_65	486	6.1	7.9	7.72194e+16	5.94023	1.19061e+13	0.404967	345133	0.255729	486.055	16.9853	-36.8931	1.49965	17	no
LBT-2mm/s	5_66	485	5.9	7.6	7.79845e+16	5.94314	1.19378e+13	0.404395	345842	0.239892	485.851	16.9839	-36.8894	1.48936	17	no
LBT-2mm/s	5_67	485	5.9	7.7	7.90106e+16	5.94703	1.198e+13	0.403637	346785	0.239892	485.706	16.9935	-36.8862	1.48058	17	no
LBT-2mm/s	5_68	493	6	7.9	5.51573e+16	5.84112	1.08722e+13	0.425077	321757	0.247838	485.684	16.9953	-36.8856	1.4791	17	no
LBT-2mm/s	5_69	485	6.1	8.1	8.3115e+16	5.96212	1.2145e+13	0.40072	350462	0.255729	485.642	16.9994	-36.8845	1.47591	18	no
LBT-2mm/s	5_70	485	7.2	9.2	9.44023e+16	6.00023	1.25698e+13	0.393493	359876	0.338748	485.597	17.0057	-36.883	1.47198	18	no
LBT-2mm/s	5_71	485	8.2	10.2	1.04663e+17	6.03127	1.29249e+13	0.38775	367687	0.407949	485.541	17.0174	-36.8808	1.46595	18	no
LBT-2mm/s	5_72	485	8.2	10	1.02611e+17	6.0253	1.2856e+13	0.388844	366175	0.407949	485.517	17.0249	-36.8793	1.46161	18	no
LBT-2mm/s	5_73	485	8.1	9.8	1.00559e+17	6.01922	1.27861e+13	0.389965	364639	0.4013	485.509	17.0285	-36.8778	1.45755	18	no
LBT-2mm/s	5_74	485	8.2	9.7	9.95328e+16	6.01613	1.27507e+13	0.390535	363862	0.407949	485.512	17.0291	-36.8769	1.45513	18	no
LBT-2mm/s	5_75	485	8.2	9.6	9.85067e+16	6.01301	1.27151e+13	0.391112	363078	0.407949	485.516	17.0294	-36.8764	1.45368	17	no
LBT-2mm/s	5_76	485	8.4	9.6	9.85067e+16	6.01301	1.27151e+13	0.391112	363078	0.421065	485.554	17.029	-36.8744	1.4483	17	no
LBT-2mm/s	5_77	485	8.5	9.6	9.85067e+16	6.01301	1.27151e+13	0.391112	363078	0.427534	485.695	17.0087	-36.8706	1.43784	17	no
LBT-2mm/s	5_78	486	9.6	10.2	9.9701e+16	6.01664	1.27565e+13	0.390441	363990	0.494798	485.885	16.9876	-36.8675	1.42921	17	no
LBT-2mm/s	5_79	486	10.6	10.8	1.05566e+17	6.03386	1.29549e+13	0.387276	368344	0.549968	486.023	16.9726	-36.8652	1.42284	16	no
LBT-2mm/s	5_80	486	13.4	12.7	1.24138e+17	6.08295	1.35343e+13	0.378467	380970	0.677159	486.117	16.9641	-36.8625	1.41561	16	no
LBT-2mm/s	5_81	486	16.1	14.6	1.42709e+17	6.1255	1.40535e+13	0.371077	392172	0.767856	486.185	16.9589	-36.8602	1.40923	16	no
LBT-2mm/s	5_82	486	28.9	31.1	3.0399e+17	6.36153	1.72367e+13	0.333837	458825	0.955401	486.225	16.9557	-36.8585	1.40436	15	no
LBT-2mm/s	5_83	486	41.6	47.6	4.65271e+17	6.49837	1.93359e+13	0.314818	501142	0.992102	486.248	16.953	-36.8566	1.39928	13	no
LBT-2mm/s	5_84	486	65.6	77.8	7.60465e+17	6.65998	2.20787e+13	0.294431	554816	0.999745	486.268	16.9513	-36.8557	1.39678	13	no
LBT-2mm/s	6_11	486	48.8	72.6	7.09637e+17	6.63698	2.16702e+13	0.297206	546926	0.997126	486.38	16.9452	-36.7784	1.18421	9	no
LBT-2mm/s	6_12	486	34.1	44.5	4.3497e+17	6.47652	1.89875e+13	0.317741	494198	0.977845	486.356	16.9453	-36.7786	1.18454	10	no
LBT-2mm/s	6_13	486	19.3	16.3	1.59326e+17	6.15933	1.44777e+13	0.365359	401251	0.844474	486.336	16.9467	-36.7809	1.19096	11	no
LBT-2mm/s	6_14	486	15.6	13.4	1.3098e+17	6.09929	1.37318e+13	0.375603	385243	0.753085	486.311	16.9492	-36.784	1.1995	12	no
LBT-2mm/s	6_15	486	11.8	10.4	1.01656e+17	6.02248	1.28236e+13	0.389363	365463	0.609136	486.267	16.9537	-36.7878	1.21004	13	no
LBT-2mm/s	6_16	486	10	9.5	9.28588e+16	5.99529	1.2514e+13	0.39442	358644	0.517531	486.191	16.9609	-36.7922	1.22213	15	no
LBT-2mm/s	6_17	486	8.1	8.6	8.40616e+16	5.96553	1.21822e+13	0.400071	351289	0.4013	486.087	16.9683	-36.7961	1.23273	17	no
LBT-2mm/s	6_18	486	7.4	8.1	7.91743e+16	5.94769	1.19867e+13	0.403518	346935	0.353071	485.963	16.9802	-36.8003	1.24435	19	no
LBT-2mm/s	6_19	485	6.6	7.6	7.79845e+16	5.94318	1.19378e+13	0.404395	345842	0.294341	485.811	17.0012	-36.8056	1.25903	21	no
LBT-2mm/s	6_20	485	6.4	7.5	7.69584e+16	5.93924	1.18952e+13	0.405163	344889	0.279068	485.66	17.0195	-36.812	1.27647	22	no
LBT-2mm/s	6_21	485	6.2	7.3	7.49061e+16	5.93121	1.18087e+13	0.406738	342953	0.263565	485.612	17.0245	-36.8147	1.28402	19	no
LBT-2mm/s	6_22	485	6.1	7.2	7.388e+16	5.92711	1.17648e+13	0.407544	341969	0.255729	485.599	17.026	-36.8157	1.28674	20	no
LBT-2mm/s	6_23	485	5.9	7.1	7.28539e+16	5.92295	1.17205e+13	0.408363	340974	0.239892	485.58	17.0277	-36.8178	1.29264	20	no
LBT-2mm/s	6_24	485	6	7.3	7.49061e+16	5.93119	1.18087e+13	0.406738	342953	0.247838	485.568	17.0265	-36.8206	1.30024	20	no
LBT-2mm/s	6_25	485	6.1	7.4	7.59322e+16	5.93524	1.18522e+13	0.405944	343926	0.255729	485.575	17.0204	-36.8247	1.31145	21	no
LBT-2mm/s	6_26	485	5.6	6.8	6.97756e+16	5.91015	1.15846e+13	0.410905	337920	0.215736	485.598	17.0156	-36.8275	1.31927	21	no
LBT-2mm/s	6_27	485	5.1	6.1	6.25928e+16	5.87799	1.12498e+13	0.417383	330353	0.174495	485.632	17.0109	-36.8303	1.32701	21	no
LBT-2mm/s	6_28	493	5	6.2	4.3288e+16	5.77055	1.01836e+13	0.440292	305887	0.166115	485.657	17.0065	-36.832	1.33157	21	no
LBT-2mm/s	6_29	485	4.9	6.2	6.36189e+16	5.88267	1.12993e+13	0.416406	331473	0.157697	485.673	17.0036	-36.833	1.33431	21	no
LBT-2mm/s	6_30	486	4.8	6.1	5.96251e+16	5.86355	1.11032e+13	0.420319	327022	0.149242	485.811	16.9892	-36.8399	1.35323	20	no
LBT-2mm/s	6_31	486	5.1	6.5	6.3535e+16	5.88238	1.12953e+13	0.416485	331383	0.174495	485.996	16.9782	-36.8471	1.373	20	no
LBT-2mm/s	6_32	486	5.4	6.8	6.64673e+16	5.89577	1.14337e+13	0.413787	334516	0.199379	486.207	16.9705	-36.8541	1.39246	19	no
LBT-2mm/s	6_33	486	5.5	6.8	6.64673e+16	5.89579	1.14337e+13	0.413787	334516	0.207582	486.444	16.9716	-36.8611	1.41177	19	no
LBT-2mm/s	6_34	486	5.6	6.8	6.64673e+16	5.89581	1.14337e+13	0.413787	334516	0.215736	486.723	16.9738	-36.8683	1.43131	18	no
LBT-2mm/s	6_35	487	5.9	6.8	6.33241e+16	5.88158	1.12851e+13	0.416685	331156	0.239892	487.004	16.9848	-36.8751	1.45015	17	no
LBT-2mm/s	6_36	487	6.1	6.7	6.23928e+16	5.87724	1.12401e+13	0.417576	330135	0.255729	487.285	17.0171	-36.8818	1.4686	17	no
LBT-2mm/s	6_37	487	6.5	6.7	6.23928e+16	5.87726	1.12401e+13	0.417576	330135	0.286734	487.557	17.0923	-36.8884	1.4867	16	no
LBT-2mm/s	6_38	487	6.8	6.7	6.23928e+16	5.87726	1.12401e+13	0.417576	330135	0.309381	487.795	17.155	-36.8946	1.5037	16	no
LBT-2mm/s	6_39	488	7	6.2	5.50132e+16	5.84039	1.08645e+13	0.425238	321582	0.324184	487.998	17.2754	-36.9002	1.51915	15	no
LBT-2mm/s	6_40	488	7.1	5.7	5.05767e+16	5.81589	1.06206e+13	0.430449	315990	0.331496	488.158	17.4254	-36.9051	1.53272	14	no
LBT-2mm/s	6_41	488	8.1	5.8	5.1464e+16	5.82095	1.06706e+13	0.429365	317139	0.4013	488.239	17.5222	-36.908	1.54058	13	no
LBT-2mm/s	6_42	488	9.1	5.8	5.1464e+16	5.82095	1.06706e+13	0.429365	317139	0.465099	488.292	17.568	-36.9101	1.54634	12	no
LBT-2mm/s	6_43	488	10.8	6	5.32386e+16	5.83083	1.07687e+13	0.427261	319390	0.560347	488.332	17.5897	-36.912	1.55155	12	no
LBT-2mm/s	6_44	488	12.5	6.2	5.50132e+16	5.8404	1.08645e+13	0.425238	321582	0.640348	488.352	17.6178	-36.9131	1.55471	12	no
LBT-2mm/s	6_45	488	14.6	6.2	5.50132e+16	5.8404	1.08645e+13	0.425238	321582	0.72089	488.364	17.6466	-36.9139	1.55699	12	no
LBT-2mm/s	6_46	488	16.7	6.1	5.41259e+16	5.83565	1.08169e+13	0.42624	320493	0.784493	488.371	17.6666	-36.9146	1.55872	12	no
LBT-2mm/s	6_47	488	20.2	6	5.32386e+16	5.83083	1.07687e+13	0.427261	319390	0.861271	488.377	17.6817	-36.9151	1.56031	12	no
LBT-2mm/s	6_48	488	23.6	5.9	5.23513e+16	5.82593	1.072e+13	0.428302	318272	0.910423	488.381	17.6912	-36.9156	1.5616	12	no
LBT-2mm/s	6_49	488	20.2	6	5.32386e+16	5.83083	1.07687e+13	0.427261	319390	0.861271	488.382	17.6981	-36.9161	1.5629	12	no
LBT-2mm/s	6_50	488	16.7	6.1	5.41259e+16	5.83565	1.08169e+13	0.42624	320493	0.784493	488.382	17.7014	-36.9165	1.56418	12	no
LBT-2mm/s	6_51	488	14.6	6.2	5.50132e+16	5.8404	1.08645e+13	0.425238	321582	0.72089	488.381	17.7005	-36.917	1.56543	12	no
LBT-2mm/s	6_52	488	12.5	6.2	5.50132e+16	5.8404	1.08645e+13	0.425238	321582	0.640348	488.377	17.6997	-36.9174	1.56642	12	no
LBT-2mm/s	6_53	488	10.8	6	5.32386e+16	5.83083	1.07687e+13	0.427261	319390	0.560347	488.364	17.6991	-36.9179	1.56789	12	no
LBT-2mm/s	6_54	488	9.1	5.8	5.1464e+16	5.82095	1.06706e+13	0.429365	317139	0.465099	488.341	17.6787	-36.9183	1.56905	13	no
LBT-2mm/s	6_55	488	8.1	5.8	5.1464e+16	5.82095	1.06706e+13	0.429365	317139	0.4013	488.297	17.6292	-36.9186	1.56973	13	no
LBT-2mm/s	6_56	488	7.1	5.7	5.05767e+16	5.81589	1.06206e+13	0.430449	315990	0.331496	488.212	17.5751	-36.9183	1.56904	13	no
LBT-2mm/s	6_57	488	7	6.2	5.50132e+16	5.84039	1.08645e+13	0.425238	321582	0.324184	488.074	17.4749	-36.9174	1.56639	14	no
LBT-2mm/s	6_58	487	6.8	6.7	6.23928e+16	5.87726	1.12401e+13	0.417576	330135	0.309381	487.895	17.3313	-36.9159	1.56228	14	no
LBT-2mm/s	6_59	487	6.5	6.7	6.23928e+16	5.87726	1.12401e+13	0.417576	330135	0.286734	487.671	17.2153	-36.9136	1.55596	15	no
LBT-2mm/s	6_60	487	6.1	6.7	6.23928e+16	5.87724	1.12401e+13	0.417576	330135	0.255729	487.426	17.0988	-36.9109	1.54853	15	no
LBT-2mm/s	6_61	487	5.9	6.8	6.33241e+16	5.88158	1.12851e+13	0.416685	331156	0.239892	487.153	17.0534	-36.9077	1.53979	15	no
LBT-2mm/s	6_62	486	5.6	6.8	6.64673e+16	5.89581	1.14337e+13	0.413787	334516	0.215736	486.847	17.0157	-36.904	1.52957	15	no
LBT-2mm/s	6_63	486	5.5	6.8	6.64673e+16	5.89579	1.14337e+13	0.413787	334516	0.207582	486.6	16.9908	-36.9006	1.52044	16	no
LBT-2mm/s	6_64	486	5.4	6.8	6.64673e+16	5.89577	1.14337e+13	0.413787	334516	0.199379	486.345	16.9882	-36.8969	1.51015	17	no
LBT-2mm/s	6_65	486	5.1	6.5	6.3535e+16	5.88238	1.12953e+13	0.416485	331383	0.174495	486.112	16.9822	-36.8931	1.4996	17	no
LBT-2mm/s	6_66	486	4.8	6.1	5.96251e+16	5.86355	1.11032e+13	0.420319	327022	0.149242	485.915	16.9809	-36.8893	1.48914	18	no
LBT-2mm/s	6_67	485	4.9	6.2	6.36189e+16	5.88267	1.12993e+13	0.416406	331473	0.157697	485.775	16.9902	-36.8861	1.48052	18	no
LBT-2mm/s	6_68	493	5	6.2	4.3288e+16	5.77055	1.01836e+13	0.440292	305887	0.166115	485.754	16.992	-36.8856	1.47907	19	no
LBT-2mm/s	6_69	485	5.1	6.1	6.25928e+16	5.87799	1.12498e+13	0.417383	330353	0.174495	485.711	16.9958	-36.8845	1.47589	19	no
LBT-2mm/s	6_70	485	5.6	6.8	6.97756e+16	5.91015	1.15846e+13	0.410905	337920	0.215736	485.664	17.0016	-36.883	1.47193	20	no
LBT-2mm/s	6_71	485	6.1	7.4	7.59322e+16	5.93524	1.18522e+13	0.405944	343926	0.255729	485.605	17.0131	-36.8807	1.46569	20	no
LBT-2mm/s	6_72	485	6	7.3	7.49061e+16	5.93119	1.18087e+13	0.406738	342953	0.247838	485.58	17.0221	-36.8792	1.46143	20	no
LBT-2mm/s	6_73	485	5.9	7.1	7.28539e+16	5.92295	1.17205e+13	0.408363	340974	0.239892	485.569	17.0244	-36.8777	1.45738	20	no
LBT-2mm/s	6_74	485	6.1	7.2	7.388e+16	5.92711	1.17648e+13	0.407544	341969	0.255729	485.567	17.0227	-36.8768	1.45494	19	no
LBT-2mm/s	6_75	485	6.2	7.3	7.49061e+16	5.93121	1.18087e+13	0.406738	342953	0.263565	485.568	17.0214	-36.8763	1.45347	19	no
LBT-2mm/s	6_76	485	6.4	7.5	7.69584e+16	5.93924	1.18952e+13	0.405163	344889	0.279068	485.601	17.0204	-36.8744	1.4481	18	no
LBT-2mm/s	6_77	485	6.6	7.6	7.79845e+16	5.94318	1.19378e+13	0.404395	345842	0.294341	485.728	17.0073	-36.8707	1.43791	18	no
LBT-2mm/s	6_78	486	7.4	8.1	7.91743e+16	5.94769	1.19867e+13	0.403518	346935	0.353071	485.894	16.9847	-36.8674	1.42899	17	no
LBT-2mm/s	6_79	486	8.1	8.6	8.40616e+16	5.96553	1.21822e+13	0.400071	351289	0.4013	486.017	16.9718	-36.8651	1.42257	17	no
LBT-2mm/s	6_80	486	10	9.5	9.28588e+16	5.99529	1.2514e+13	0.39442	358644	0.517531	486.115	16.9646	-36.8629	1.41657	16	no
LBT-2mm/s	6_81	486	11.8	10.4	1.01656e+17	6.02248	1.28236e+13	0.389363	365463	0.609136	486.2	16.9592	-36.8613	1.41207	16	no
LBT-2mm/s	6_82	486	15.6	13.4	1.3098e+17	6.09929	1.37318e+13	0.375603	385243	0.753085	486.251	16.9556	-36.8597	1.40789	16	no
LBT-2mm/s	6_83	486	19.3	16.3	1.59326e+17	6.15933	1.44777e+13	0.365359	401251	0.844474	486.281	16.9524	-36.8579	1.40276	13	no
LBT-2mm/s	6_84	486	34.1	44.5	4.3497e+17	6.47652	1.89875e+13	0.317741	494198	0.977845	486.295	16.9501	-36.8561	1.3978	13	no
LBT-2mm/s	6_85	486	48.8	72.6	7.09637e+17	6.63698	2.16702e+13	0.297206	546926	0.997126	486.302	16.9483	-36.8544	1.39327	12	no
LBT-2mm/s	7_10	486	46.9	73.2	7.15501e+17	6.63972	2.17184e+13	0.296874	547859	0.996241	486.386	16.9436	-36.7759	1.17711	9	no
LBT-2mm/s	7_11	486	39.4	60.2	5.88431e+17	6.57512	2.06016e+13	0.304873	526122	0.989284	486.371	16.9436	-36.7763	1.17839	10	no
LBT-2mm/s	7_12	486	27.4	36.5	3.56773e+17	6.41266	1.79982e+13	0.326528	474311	0.945575	486.372	16.9444	-36.7784	1.18404	11	no
LBT-2mm/s	7_13	486	15.4	12.8	1.25115e+17	6.08533	1.3563e+13	0.378047	381592	0.746936	486.367	16.9463	-36.7822	1.19463	12	no
LBT-2mm/s	7_14	486	12.5	11	1.07521e+17	6.0394	1.30192e+13	0.386267	369753	0.640348	486.327	16.9487	-36.7848	1.20174	13	no
LBT-2mm/s	7_15	486	9.6	9.1	8.89489e+16	5.98241	1.23695e+13	0.396851	355447	0.494798	486.27	16.9531	-36.788	1.21065	14	no
LBT-2mm/s	7_16	486	8.1	8.3	8.11293e+16	5.95495	1.20659e+13	0.40211	348702	0.4013	486.184	16.96	-36.792	1.22153	16	no
LBT-2mm/s	7_17	486	6.5	7.4	7.23321e+16	5.92086	1.16978e+13	0.408785	340464	0.286734	486.084	16.9681	-36.7959	1.23236	19	no
LBT-2mm/s	7_18	486	5.9	7	6.84223e+16	5.9044	1.15235e+13	0.412064	336544	0.239892	485.975	16.9802	-36.8002	1.24412	21	no
LBT-2mm/s	7_19	485	5.3	6.6	6.77234e+16	5.90126	1.14916e+13	0.412673	335823	0.191129	485.848	16.997	-36.8055	1.25879	23	no
LBT-2mm/s	7_20	485	5.1	6.4	6.56711e+16	5.89212	1.13966e+13	0.414506	333675	0.174495	485.725	17.0113	-36.8119	1.27618	26	no
LBT-2mm/s	7_21	485	4.8	6.2	6.36189e+16	5.88259	1.12993e+13	0.416406	331472	0.149242	485.688	17.0158	-36.8146	1.28376	23	no
LBT-2mm/s	7_22	485	4.8	6.2	6.36189e+16	5.88259	1.12993e+13	0.416406	331472	0.149242	485.679	17.0173	-36.8156	1.28647	23	no
LBT-2mm/s	7_23	485	4.7	6.2	6.36189e+16	5.88251	1.12993e+13	0.416406	331471	0.140754	485.666	17.0202	-36.8177	1.29237	24	no
LBT-2mm/s	7_24	485	4.7	6.1	6.25928e+16	5.87772	1.12498e+13	0.417383	330349	0.140754	485.66	17.0219	-36.8205	1.30004	25	no
LBT-2mm/s	7_25	485	4.7	5.9	6.05406e+16	5.86794	1.1149e+13	0.419395	328061	0.140754	485.674	17.0161	-36.8246	1.31134	25	no
LBT-2mm/s	7_26	485	4.6	5.8	5.95145e+16	5.86281	1.10977e+13	0.420432	326892	0.132236	485.699	17.0098	-36.8275	1.31911	25	no
LBT-2mm/s	7_27	485	4.4	5.7	5.84884e+16	5.85743	1.10457e+13	0.421489	325705	0.115129	485.734	17.0056	-36.8303	1.32687	25	no
LBT-2mm/s	7_28	493	4.4	5.7	3.9797e+16	5.74574	9.95503e+12	0.445721	300554	0.115129	485.759	17.0021	-36.832	1.33147	25	no
LBT-2mm/s	7_29	486	4.4	5.7	5.57153e+16	5.84322	1.09017e+13	0.424459	322422	0.115129	485.775	16.9996	-36.833	1.33423	23	no
LBT-2mm/s	7_30	486	4.4	5.8	5.66927e+16	5.8483	1.09531e+13	0.423393	323594	0.115129	485.912	16.9838	-36.8398	1.35313	23	no
LBT-2mm/s	7_31	486	4.4	5.9	5.76702e+16	5.8533	1.10037e+13	0.422348	324750	0.115129	486.092	16.9728	-36.847	1.37295	22	no
LBT-2mm/s	7_32	486	4.4	5.9	5.76702e+16	5.8533	1.10037e+13	0.422348	324750	0.115129	486.296	16.9651	-36.8541	1.39236	21	no
LBT-2mm/s	7_33	487	4.5	5.9	5.49429e+16	5.8393	1.08607e+13	0.425317	321487	0.123693	486.526	16.9679	-36.8611	1.41166	21	no
LBT-2mm/s	7_34	487	4.6	5.8	5.40117e+16	5.83444	1.08107e+13	0.42637	320344	0.132236	486.79	16.9684	-36.8682	1.43124	20	no
LBT-2mm/s	7_35	487	4.8	5.7	5.30805e+16	5.82957	1.07601e+13	0.427445	319187	0.149242	487.057	16.9789	-36.8751	1.45008	19	no
LBT-2mm/s	7_36	487	4.9	5.5	5.1218e+16	5.81924	1.06568e+13	0.429663	316818	0.157697	487.324	17.0057	-36.8818	1.46853	19	no
LBT-2mm/s	7_37	488	5.3	5.5	4.88021e+16	5.80537	1.05187e+13	0.432685	313641	0.191129	487.584	17.0764	-36.8884	1.48663	18	no
LBT-2mm/s	7_38	488	5.6	5.4	4.79148e+16	5.80011	1.04667e+13	0.433839	312443	0.215736	487.814	17.1497	-36.8945	1.50349	17	no
LBT-2mm/s	7_39	488	5.7	5.4	4.79148e+16	5.80013	1.04667e+13	0.433839	312444	0.22384	488.011	17.2911	-36.9	1.51862	17	no
LBT-2mm/s	7_40	488	5.8	5.4	4.79148e+16	5.80014	1.04667e+13	0.433839	312444	0.231892	488.164	17.4222	-36.9049	1.53207	15	no
LBT-2mm/s	7_41	488	6.7	5.4	4.79148e+16	5.80018	1.04667e+13	0.433839	312444	0.301891	488.244	17.5248	-36.9076	1.53969	14	no
LBT-2mm/s	7_42	488	7.5	5.3	4.70274e+16	5.79477	1.0414e+13	0.435018	311228	0.360142	488.296	17.5688	-36.9097	1.54543	13	no
LBT-2mm/s	7_43	488	9	5.3	4.70274e+16	5.79477	1.0414e+13	0.435018	311228	0.458986	488.335	17.592	-36.9116	1.55051	12	no
LBT-2mm/s	7_44	488	10.5	5.3	4.70274e+16	5.79477	1.0414e+13	0.435018	311228	0.544697	488.355	17.6179	-36.9127	1.55358	12	no
LBT-2mm/s	7_45	488	12.6	5.3	4.70274e+16	5.79477	1.0414e+13	0.435018	311228	0.644618	488.367	17.6409	-36.9135	1.55584	12	no
LBT-2mm/s	7_46	488	14.6	5.3	4.70274e+16	5.79477	1.0414e+13	0.435018	311228	0.72089	488.375	17.6561	-36.9142	1.55762	12	no
LBT-2mm/s	7_47	488	17.1	5.3	4.70274e+16	5.79477	1.0414e+13	0.435018	311228	0.794957	488.381	17.6679	-36.9148	1.55928	12	no
LBT-2mm/s	7_48	488	19.5	5.3	4.70274e+16	5.79477	1.0414e+13	0.435018	311228	0.848366	488.385	17.6766	-36.9153	1.56061	12	no
LBT-2mm/s	7_49	488	17.1	5.3	4.70274e+16	5.79477	1.0414e+13	0.435018	311228	0.794957	488.387	17.6854	-36.9157	1.56194	12	no
LBT-2mm/s	7_50	488	14.6	5.3	4.70274e+16	5.79477	1.0414e+13	0.435018	311228	0.72089	488.387	17.6934	-36.9162	1.56321	12	no
LBT-2mm/s	7_51	488	12.6	5.3	4.70274e+16	5.79477	1.0414e+13	0.435018	311228	0.644618	488.384	17.6974	-36.9166	1.56442	12	no
LBT-2mm/s	7_52	488	10.5	5.3	4.70274e+16	5.79477	1.0414e+13	0.435018	311228	0.544697	488.38	17.696	-36.917	1.56539	12	no
LBT-2mm/s	7_53	488	9	5.3	4.70274e+16	5.79477	1.0414e+13	0.435018	311228	0.458986	488.366	17.6866	-36.9175	1.56687	12	no
LBT-2mm/s	7_54	488	7.5	5.3	4.70274e+16	5.79477	1.0414e+13	0.435018	311228	0.360142	488.344	17.6792	-36.9179	1.56801	13	no
LBT-2mm/s	7_55	488	6.7	5.4	4.79148e+16	5.80018	1.04667e+13	0.433839	312444	0.301891	488.301	17.6629	-36.9182	1.56862	13	no
LBT-2mm/s	7_56	488	5.8	5.4	4.79148e+16	5.80014	1.04667e+13	0.433839	312444	0.231892	488.22	17.5956	-36.918	1.5683	14	no
LBT-2mm/s	7_57	488	5.7	5.4	4.79148e+16	5.80013	1.04667e+13	0.433839	312444	0.22384	488.085	17.4664	-36.9172	1.5659	14	no
LBT-2mm/s	7_58	488	5.6	5.4	4.79148e+16	5.80011	1.04667e+13	0.433839	312443	0.215736	487.911	17.3315	-36.9157	1.56184	15	no
LBT-2mm/s	7_59	488	5.3	5.5	4.88021e+16	5.80537	1.05187e+13	0.432685	313641	0.191129	487.695	17.2078	-36.9135	1.55577	16	no
LBT-2mm/s	7_60	487	4.9	5.5	5.1218e+16	5.81924	1.06568e+13	0.429663	316818	0.157697	487.459	17.0867	-36.9108	1.5483	16	no
LBT-2mm/s	7_61	487	4.8	5.7	5.30805e+16	5.82957	1.07601e+13	0.427445	319187	0.149242	487.201	17.048	-36.9076	1.53964	17	no
LBT-2mm/s	7_62	487	4.6	5.8	5.40117e+16	5.83444	1.08107e+13	0.42637	320344	0.132236	486.911	17.0116	-36.9039	1.5295	17	no
LBT-2mm/s	7_63	487	4.5	5.9	5.49429e+16	5.8393	1.08607e+13	0.425317	321487	0.123693	486.673	16.9846	-36.9006	1.52039	17	no
LBT-2mm/s	7_64	486	4.4	5.9	5.76702e+16	5.8533	1.10037e+13	0.422348	324750	0.115129	486.429	16.9789	-36.8969	1.51014	18	no
LBT-2mm/s	7_65	486	4.4	5.9	5.76702e+16	5.8533	1.10037e+13	0.422348	324750	0.115129	486.203	16.9774	-36.893	1.4995	18	no
LBT-2mm/s	7_66	486	4.4	5.8	5.66927e+16	5.8483	1.09531e+13	0.423393	323594	0.115129	486.013	16.9774	-36.8892	1.48902	19	no
LBT-2mm/s	7_67	486	4.4	5.7	5.57153e+16	5.84322	1.09017e+13	0.424459	322422	0.115129	485.879	16.9872	-36.8861	1.48034	19	no
LBT-2mm/s	7_68	493	4.4	5.7	3.9797e+16	5.74574	9.95503e+12	0.445721	300554	0.115129	485.858	16.989	-36.8855	1.47887	20	no
LBT-2mm/s	7_69	485	4.4	5.7	5.84884e+16	5.85743	1.10457e+13	0.421489	325705	0.115129	485.816	16.9929	-36.8844	1.47567	21	no
LBT-2mm/s	7_70	485	4.6	5.8	5.95145e+16	5.86281	1.10977e+13	0.420432	326892	0.132236	485.769	16.9984	-36.8829	1.47173	22	no
LBT-2mm/s	7_71	485	4.7	5.9	6.05406e+16	5.86794	1.1149e+13	0.419395	328061	0.140754	485.709	17.0095	-36.8807	1.46559	22	no
LBT-2mm/s	7_72	485	4.7	6.1	6.25928e+16	5.87772	1.12498e+13	0.417383	330349	0.140754	485.681	17.0192	-36.8791	1.46126	22	no
LBT-2mm/s	7_73	485	4.7	6.2	6.36189e+16	5.88251	1.12993e+13	0.416406	331471	0.140754	485.665	17.0198	-36.8777	1.45717	21	no
LBT-2mm/s	7_74	485	4.8	6.2	6.36189e+16	5.88259	1.12993e+13	0.416406	331472	0.149242	485.66	17.017	-36.8768	1.45474	21	no
LBT-2mm/s	7_75	485	4.8	6.2	6.36189e+16	5.88259	1.12993e+13	0.416406	331472	0.149242	485.66	17.0154	-36.8762	1.4533	20	no
LBT-2mm/s	7_76	485	5.1	6.4	6.56711e+16	5.89212	1.13966e+13	0.414506	333675	0.174495	485.68	17.0119	-36.8743	1.44787	19	no
LBT-2mm/s	7_77	485	5.3	6.6	6.77234e+16	5.90126	1.14916e+13	0.412673	335823	0.191129	485.781	17.0017	-36.8706	1.43779	19	no
LBT-2mm/s	7_78	486	5.9	7	6.84223e+16	5.9044	1.15235e+13	0.412064	336544	0.239892	485.918	16.9818	-36.8673	1.42871	18	no
LBT-2mm/s	7_79	486	6.5	7.4	7.23321e+16	5.92086	1.16978e+13	0.408785	340464	0.286734	486.025	16.9709	-36.8649	1.42221	17	no
LBT-2mm/s	7_80	486	8.1	8.3	8.11293e+16	5.95495	1.20659e+13	0.40211	348702	0.4013	486.117	16.9639	-36.8629	1.41655	17	no
LBT-2mm/s	7_81	486	9.6	9.1	8.89489e+16	5.98241	1.23695e+13	0.396851	355447	0.494798	486.201	16.958	-36.8612	1.41181	16	no
LBT-2mm/s	7_82	486	12.5	11	1.07521e+17	6.0394	1.30192e+13	0.386267	369753	0.640348	486.257	16.9542	-36.8598	1.40807	17	no
LBT-2mm/s	7_83	486	15.4	12.8	1.25115e+17	6.08533	1.3563e+13	0.378047	381592	0.746936	486.302	16.9512	-36.8586	1.40483	15	no
LBT-2mm/s	7_84	486	27.4	36.5	3.56773e+17	6.41266	1.79982e+13	0.326528	474311	0.945575	486.329	16.9491	-36.8573	1.4011	13	no
LBT-2mm/s	7_85	486	39.4	60.2	5.88431e+17	6.57512	2.06016e+13	0.304873	526122	0.989284	486.336	16.947	-36.8551	1.39503	12	no
LBT-2mm/s	7_86	486	46.9	73.2	7.15501e+17	6.63972	2.17184e+13	0.296874	547859	0.996241	486.334	16.9458	-36.8535	1.39086	12	no
LBT-2mm/s	8_8	486	50.3	83.3	8.14225e+17	6.68276	2.24897e+13	0.291722	562716	0.997677	486.431	16.9421	-36.7743	1.17269	10	no
LBT-2mm/s	8_9	486	45.4	74.1	7.24299e+17	6.64377	2.17902e+13	0.296382	549247	0.995357	486.413	16.9419	-36.7738	1.17148	10	no
LBT-2mm/s	8_10	486	38.8	60.5	5.91364e+17	6.57676	2.06293e+13	0.304666	526664	0.988359	486.401	16.9422	-36.7746	1.17353	10	no
LBT-2mm/s	8_11	486	32.1	46.8	4.57452e+17	6.49286	1.92476e+13	0.315551	499385	0.970956	486.403	16.9429	-36.7764	1.17856	10	no
LBT-2mm/s	8_12	486	22.9	29.6	2.89328e+17	6.34583	1.70082e+13	0.336132	454146	0.901914	486.408	16.944	-36.779	1.18581	11	no
LBT-2mm/s	8_13	486	13.6	12.3	1.20228e+17	6.07322	1.34179e+13	0.380188	378443	0.684859	486.389	16.9454	-36.7823	1.19473	11	no
LBT-2mm/s	8_14	486	11.1	10.6	1.03611e+17	6.02822	1.28897e+13	0.388308	366915	0.575522	486.346	16.9472	-36.7847	1.20143	13	no
LBT-2mm/s	8_15	486	8.6	8.8	8.60166e+16	5.97239	1.2258e+13	0.398757	352975	0.433943	486.284	16.9507	-36.7877	1.2097	14	no
LBT-2mm/s	8_16	486	7.3	8	7.81969e+16	5.94399	1.19466e+13	0.404237	346038	0.345939	486.208	16.9561	-36.7917	1.22082	17	no
LBT-2mm/s	8_17	486	5.9	7.1	6.93997e+16	5.90859	1.15678e+13	0.411224	337540	0.239892	486.129	16.9623	-36.7958	1.23189	20	no
LBT-2mm/s	8_18	486	5.4	6.7	6.54899e+16	5.8914	1.13881e+13	0.414671	333485	0.199379	486.049	16.9721	-36.8001	1.24385	23	no
LBT-2mm/s	8_19	486	4.8	6.2	6.06026e+16	5.86832	1.11521e+13	0.419333	328132	0.149242	485.965	16.9854	-36.8054	1.25851	26	no
LBT-2mm/s	8_20	486	4.6	5.9	5.76702e+16	5.85359	1.10037e+13	0.422348	324754	0.132236	485.901	17.0014	-36.8118	1.2759	29	no
LBT-2mm/s	8_21	485	4.3	5.6	5.74622e+16	5.85205	1.0993e+13	0.422568	324503	0.106548	485.888	17.0097	-36.8145	1.28351	26	no
LBT-2mm/s	8_22	485	4.2	5.5	5.64361e+16	5.84654	1.09396e+13	0.42367	323282	0.097957	485.886	17.0126	-36.8155	1.2862	27	no
LBT-2mm/s	8_23	485	4.1	5.3	5.43839e+16	5.83543	1.08308e+13	0.425947	320790	0.0893621	485.886	17.0189	-36.8176	1.29205	28	no
LBT-2mm/s	8_24	486	4.1	5.4	5.27829e+16	5.82672	1.07438e+13	0.427793	318797	0.0893621	485.895	17.0256	-36.8204	1.29975	29	no
LBT-2mm/s	8_25	486	4.1	5.4	5.27829e+16	5.82672	1.07438e+13	0.427793	318797	0.0893621	485.926	17.0251	-36.8246	1.31113	30	no
LBT-2mm/s	8_26	486	4.1	5.5	5.37604e+16	5.83207	1.07971e+13	0.426658	320020	0.0893621	485.957	17.0175	-36.8274	1.31888	28	no
LBT-2mm/s	8_27	486	4.1	5.5	5.37604e+16	5.83207	1.07971e+13	0.426658	320020	0.0893621	485.996	17.0085	-36.8302	1.32667	28	no
LBT-2mm/s	8_28	493	4.1	5.6	3.90988e+16	5.73995	9.90757e+12	0.446874	299435	0.0893621	486.022	17.0039	-36.8319	1.33129	28	no
LBT-2mm/s	8_29	486	4.1	5.6	5.47378e+16	5.83733	1.08498e+13	0.425547	321225	0.0893621	486.039	17.0012	-36.8329	1.33407	26	no
LBT-2mm/s	8_30	486	4.1	5.8	5.66927e+16	5.84758	1.09531e+13	0.423393	323585	0.0893621	486.171	16.9833	-36.8398	1.35304	25	no
LBT-2mm/s	8_31	486	4.1	5.8	5.66927e+16	5.84758	1.09531e+13	0.423393	323585	0.0893621	486.338	16.9754	-36.847	1.37294	24	no
LBT-2mm/s	8_32	486	4.1	5.8	5.66927e+16	5.84758	1.09531e+13	0.423393	323585	0.0893621	486.527	16.9694	-36.8541	1.39234	23	no
LBT-2mm/s	8_33	487	4.2	5.8	5.40117e+16	5.83372	1.08107e+13	0.42637	320335	0.097957	486.741	16.9635	-36.8611	1.41168	22	no
LBT-2mm/s	8_34	487	4.2	5.8	5.40117e+16	5.83372	1.08107e+13	0.42637	320335	0.097957	486.981	16.9659	-36.8682	1.43123	22	no
LBT-2mm/s	8_35	487	4.3	5.7	5.30805e+16	5.82889	1.07601e+13	0.427445	319178	0.106548	487.225	16.9664	-36.8751	1.45018	21	no
LBT-2mm/s	8_36	487	4.4	5.6	5.21492e+16	5.82393	1.07088e+13	0.428542	318004	0.115129	487.469	16.9998	-36.8818	1.46847	20	no
LBT-2mm/s	8_37	488	4.8	5.6	4.96894e+16	5.81036	1.057e+13	0.431555	314820	0.149242	487.708	17.0503	-36.8884	1.48663	19	no
LBT-2mm/s	8_38	488	5.1	5.6	4.96894e+16	5.81053	1.057e+13	0.431555	314822	0.174495	487.921	17.1446	-36.8944	1.50321	19	no
LBT-2mm/s	8_39	488	5.3	5.6	4.96894e+16	5.8106	1.057e+13	0.431555	314823	0.191129	488.105	17.2758	-36.8999	1.51833	18	no
LBT-2mm/s	8_40	488	5.5	5.5	4.88021e+16	5.80542	1.05187e+13	0.432685	313642	0.207582	488.25	17.3996	-36.9047	1.5316	16	no
LBT-2mm/s	8_41	488	6.1	5.5	4.88021e+16	5.80549	1.05187e+13	0.432685	313643	0.255729	488.326	17.5144	-36.9075	1.53922	14	no
LBT-2mm/s	8_42	488	6.7	5.5	4.88021e+16	5.80551	1.05187e+13	0.432685	313643	0.301891	488.375	17.5791	-36.9095	1.54485	13	no
LBT-2mm/s	8_43	488	8	5.5	4.88021e+16	5.80552	1.05187e+13	0.432685	313643	0.394591	488.412	17.6021	-36.9113	1.54975	12	no
LBT-2mm/s	8_44	488	9.3	5.5	4.88021e+16	5.80552	1.05187e+13	0.432685	313643	0.477152	488.431	17.6153	-36.9124	1.55288	12	no
LBT-2mm/s	8_45	488	11.1	5.5	4.88021e+16	5.80552	1.05187e+13	0.432685	313643	0.575522	488.443	17.6262	-36.9133	1.55521	11	no
LBT-2mm/s	8_46	488	12.9	5.5	4.88021e+16	5.80552	1.05187e+13	0.432685	313643	0.657155	488.451	17.6353	-36.9139	1.55698	11	no
LBT-2mm/s	8_47	488	15.3	5.5	4.88021e+16	5.80552	1.05187e+13	0.432685	313643	0.743808	488.456	17.6483	-36.9145	1.55852	11	no
LBT-2mm/s	8_48	488	17.6	5.5	4.88021e+16	5.80552	1.05187e+13	0.432685	313643	0.807367	488.459	17.6642	-36.9149	1.55968	11	no
LBT-2mm/s	8_49	488	15.3	5.5	4.88021e+16	5.80552	1.05187e+13	0.432685	313643	0.743808	488.461	17.6829	-36.9153	1.56083	12	no
LBT-2mm/s	8_50	488	12.9	5.5	4.88021e+16	5.80552	1.05187e+13	0.432685	313643	0.657155	488.46	17.703	-36.9157	1.56197	12	no
LBT-2mm/s	8_51	488	11.1	5.5	4.88021e+16	5.80552	1.05187e+13	0.432685	313643	0.575522	488.458	17.7208	-36.9162	1.56312	12	no
LBT-2mm/s	8_52	488	9.3	5.5	4.88021e+16	5.80552	1.05187e+13	0.432685	313643	0.477152	488.453	17.7338	-36.9165	1.5641	12	no
LBT-2mm/s	8_53	488	8	5.5	4.88021e+16	5.80552	1.05187e+13	0.432685	313643	0.394591	488.44	17.7328	-36.9171	1.56582	12	no
LBT-2mm/s	8_54	488	6.7	5.5	4.88021e+16	5.80551	1.05187e+13	0.432685	313643	0.301891	488.419	17.6902	-36.9177	1.56734	13	no
LBT-2mm/s	8_55	488	6.1	5.5	4.88021e+16	5.80549	1.05187e+13	0.432685	313643	0.255729	488.378	17.6782	-36.9178	1.56772	14	no
LBT-2mm/s	8_56	488	5.5	5.5	4.88021e+16	5.80542	1.05187e+13	0.432685	313642	0.207582	488.303	17.5927	-36.9178	1.56755	14	no
LBT-2mm/s	8_57	488	5.3	5.6	4.96894e+16	5.8106	1.057e+13	0.431555	314823	0.191129	488.175	17.4268	-36.917	1.56534	15	no
LBT-2mm/s	8_58	488	5.1	5.6	4.96894e+16	5.81053	1.057e+13	0.431555	314822	0.174495	488.012	17.3472	-36.9155	1.56124	16	no
LBT-2mm/s	8_59	488	4.8	5.6	4.96894e+16	5.81036	1.057e+13	0.431555	314820	0.149242	487.814	17.1851	-36.9135	1.55575	16	no
LBT-2mm/s	8_60	487	4.4	5.6	5.21492e+16	5.82393	1.07088e+13	0.428542	318004	0.115129	487.593	17.0782	-36.9107	1.54812	17	no
LBT-2mm/s	8_61	487	4.3	5.7	5.30805e+16	5.82889	1.07601e+13	0.427445	319178	0.106548	487.356	17.0398	-36.9076	1.53964	18	no
LBT-2mm/s	8_62	487	4.2	5.8	5.40117e+16	5.83372	1.08107e+13	0.42637	320335	0.097957	487.093	17.0059	-36.9039	1.52944	18	no
LBT-2mm/s	8_63	487	4.2	5.8	5.40117e+16	5.83372	1.08107e+13	0.42637	320335	0.097957	486.873	16.986	-36.9006	1.52036	18	no
LBT-2mm/s	8_64	486	4.1	5.8	5.66927e+16	5.84758	1.09531e+13	0.423393	323585	0.0893621	486.65	16.9771	-36.8969	1.51017	18	no
LBT-2mm/s	8_65	486	4.1	5.8	5.66927e+16	5.84758	1.09531e+13	0.423393	323585	0.0893621	486.442	16.982	-36.893	1.49945	19	no
LBT-2mm/s	8_66	486	4.1	5.8	5.66927e+16	5.84758	1.09531e+13	0.423393	323585	0.0893621	486.265	16.9838	-36.8892	1.48895	20	no
LBT-2mm/s	8_67	486	4.1	5.6	5.47378e+16	5.83733	1.08498e+13	0.425547	321225	0.0893621	486.138	16.9944	-36.886	1.48022	21	no
LBT-2mm/s	8_68	493	4.1	5.6	3.90988e+16	5.73995	9.90757e+12	0.446874	299435	0.0893621	486.118	16.9969	-36.8855	1.47872	22	no
LBT-2mm/s	8_69	486	4.1	5.5	5.37604e+16	5.83207	1.07971e+13	0.426658	320020	0.0893621	486.077	17.0023	-36.8843	1.47548	22	no
LBT-2mm/s	8_70	486	4.1	5.5	5.37604e+16	5.83207	1.07971e+13	0.426658	320020	0.0893621	486.031	17.0077	-36.8829	1.47151	23	no
LBT-2mm/s	8_71	486	4.1	5.4	5.27829e+16	5.82672	1.07438e+13	0.427793	318797	0.0893621	485.97	17.0126	-36.8806	1.46536	24	no
LBT-2mm/s	8_72	486	4.1	5.4	5.27829e+16	5.82672	1.07438e+13	0.427793	318797	0.0893621	485.935	17.013	-36.879	1.46098	24	no
LBT-2mm/s	8_73	485	4.1	5.3	5.43839e+16	5.83543	1.08308e+13	0.425947	320790	0.0893621	485.91	17.012	-36.8775	1.45688	23	no
LBT-2mm/s	8_74	485	4.2	5.5	5.64361e+16	5.84654	1.09396e+13	0.42367	323282	0.097957	485.9	17.0118	-36.8767	1.45449	22	no
LBT-2mm/s	8_75	485	4.3	5.6	5.74622e+16	5.85205	1.0993e+13	0.422568	324503	0.106548	485.895	17.0118	-36.8762	1.45306	21	no
LBT-2mm/s	8_76	486	4.6	5.9	5.76702e+16	5.85359	1.10037e+13	0.422348	324754	0.132236	485.89	17.0086	-36.8742	1.44764	21	no
LBT-2mm/s	8_77	486	4.8	6.2	6.06026e+16	5.86832	1.11521e+13	0.419333	328132	0.149242	485.929	16.9868	-36.8705	1.43755	20	no
LBT-2mm/s	8_78	486	5.4	6.7	6.54899e+16	5.8914	1.13881e+13	0.414671	333485	0.199379	486.012	16.9723	-36.8672	1.42849	19	no
LBT-2mm/s	8_79	486	5.9	7.1	6.93997e+16	5.90859	1.15678e+13	0.411224	337540	0.239892	486.088	16.9659	-36.8649	1.42202	18	no
LBT-2mm/s	8_80	486	7.3	8	7.81969e+16	5.94399	1.19466e+13	0.404237	346038	0.345939	486.162	16.9593	-36.8628	1.41625	17	no
LBT-2mm/s	8_81	486	8.6	8.8	8.60166e+16	5.97239	1.2258e+13	0.398757	352975	0.433943	486.231	16.9544	-36.8609	1.41095	16	no
LBT-2mm/s	8_82	486	11.1	10.6	1.03611e+17	6.02822	1.28897e+13	0.388308	366915	0.575522	486.279	16.9512	-36.8594	1.40688	17	no
LBT-2mm/s	8_83	486	13.6	12.3	1.20228e+17	6.07322	1.34179e+13	0.380188	378443	0.684859	486.321	16.9488	-36.8581	1.40343	15	no
LBT-2mm/s	8_84	486	22.9	29.6	2.89328e+17	6.34583	1.70082e+13	0.336132	454146	0.901914	486.358	16.947	-36.8572	1.4009	13	no
LBT-2mm/s	8_85	486	32.1	46.8	4.57452e+17	6.49286	1.92476e+13	0.315551	499385	0.970956	486.391	16.9455	-36.8561	1.39785	12	no
LBT-2mm/s	8_86	486	38.8	60.5	5.91364e+17	6.57676	2.06293e+13	0.304666	526664	0.988359	486.401	16.9445	-36.8549	1.39456	12	no
LBT-2mm/s	8_87	486	50.3	74.1	7.24299e+17	6.64377	2.17902e+13	0.296382	549247	0.997677	486.399	16.9439	-36.8539	1.39184	11	no
LBT-2mm/s	9_9	486	47.9	77.1	7.53622e+17	6.65697	2.20249e+13	0.294792	553778	0.996736	486.442	16.9403	-36.7742	1.17268	10	no
LBT-2mm/s	9_10	486	42	65.8	6.43169e+17	6.60443	2.11023e+13	0.301203	535902	0.992529	486.433	16.9405	-36.775	1.17488	10	no
LBT-2mm/s	9_11	486	36.1	54.4	5.31739e+17	6.5419	2.00457e+13	0.309117	515198	0.983132	486.435	16.9409	-36.7767	1.17933	11	no
LBT-2mm/s	9_12	486	25.2	34.4	3.36247e+17	6.39369	1.77125e+13	0.329211	468520	0.927294	486.438	16.9414	-36.7788	1.18534	12	no
LBT-2mm/s	9_13	486	14.3	14.3	1.39777e+17	6.11914	1.3975e+13	0.372167	390484	0.7105	486.423	16.9422	-36.7819	1.19369	14	no
LBT-2mm/s	9_14	486	11.4	12.1	1.18273e+17	6.06825	1.33586e+13	0.381073	377156	0.590231	486.389	16.9437	-36.7844	1.20066	15	no
LBT-2mm/s	9_15	486	8.5	9.8	9.57912e+16	6.00462	1.26195e+13	0.392674	360972	0.427534	486.341	16.9468	-36.7876	1.20941	15	no
LBT-2mm/s	9_16	486	7.1	9	8.79715e+16	5.9791	1.23326e+13	0.397478	354630	0.331496	486.28	16.951	-36.7916	1.22049	18	no
LBT-2mm/s	9_17	486	5.6	8.1	7.91743e+16	5.94761	1.19867e+13	0.403518	346934	0.215736	486.222	16.9551	-36.7957	1.23157	22	no
LBT-2mm/s	9_18	486	5.1	7.2	7.03772e+16	5.91254	1.16115e+13	0.410398	338523	0.174495	486.166	16.9613	-36.8	1.24353	25	no
LBT-2mm/s	9_19	486	4.5	6.2	6.06026e+16	5.868	1.11521e+13	0.419333	328128	0.123693	486.121	16.975	-36.8053	1.25817	29	no
LBT-2mm/s	9_20	486	4.3	5.9	5.76702e+16	5.85311	1.10037e+13	0.422348	324747	0.106548	486.11	17	-36.8116	1.27551	32	no
LBT-2mm/s	9_21	486	4.1	5.5	5.37604e+16	5.83207	1.07971e+13	0.426658	320020	0.0893621	486.12	17.0128	-36.8144	1.2831	32	no
LBT-2mm/s	9_22	486	4.1	5.4	5.27829e+16	5.82672	1.07438e+13	0.427793	318797	0.0893621	486.125	17.0165	-36.8154	1.28578	32	no
LBT-2mm/s	9_23	486	4.1	5.3	5.18054e+16	5.82128	1.06897e+13	0.428953	317556	0.0893621	486.141	17.0225	-36.8175	1.29162	30	no
LBT-2mm/s	9_24	486	4	5.3	5.18054e+16	5.82092	1.06897e+13	0.428953	317551	0.0807714	486.167	17.0273	-36.8203	1.29931	30	no
LBT-2mm/s	9_25	486	3.9	5.2	5.0828e+16	5.81495	1.06348e+13	0.430139	316286	0.0721943	486.216	17.028	-36.8244	1.31071	30	no
LBT-2mm/s	9_26	486	3.9	5.3	5.18054e+16	5.82049	1.06897e+13	0.428953	317546	0.0721943	486.254	17.0285	-36.8273	1.31854	30	no
LBT-2mm/s	9_27	486	3.8	5.4	5.27829e+16	5.82541	1.07438e+13	0.427793	318780	0.063642	486.296	17.0246	-36.8301	1.32642	30	no
LBT-2mm/s	9_28	493	3.8	5.5	3.84006e+16	5.73348	9.85949e+12	0.448051	298294	0.063642	486.322	17.0203	-36.8318	1.33106	30	no
LBT-2mm/s	9_29	486	3.8	5.6	5.47378e+16	5.83601	1.08498e+13	0.425547	321208	0.063642	486.338	17.0173	-36.8328	1.33384	28	no
LBT-2mm/s	9_30	486	3.9	5.2	5.0828e+16	5.81495	1.06348e+13	0.430139	316286	0.0721943	486.458	16.9977	-36.8398	1.35292	27	no
LBT-2mm/s	9_31	486	4	5.7	5.57153e+16	5.84214	1.09017e+13	0.424459	322408	0.0807714	486.607	16.98	-36.847	1.37289	26	no
LBT-2mm/s	9_32	486	4.1	6.1	5.96251e+16	5.86234	1.11032e+13	0.420319	327006	0.0893621	486.779	16.9679	-36.8541	1.39235	25	no
LBT-2mm/s	9_33	487	4.2	6.2	5.77366e+16	5.85321	1.10071e+13	0.422277	324822	0.097957	486.976	16.9702	-36.8611	1.41164	24	no
LBT-2mm/s	9_34	487	4.2	6.2	5.77366e+16	5.85321	1.10071e+13	0.422277	324822	0.097957	487.203	16.9538	-36.8682	1.43127	24	no
LBT-2mm/s	9_35	487	4.3	6.2	5.77366e+16	5.85344	1.10071e+13	0.422277	324825	0.106548	487.434	16.961	-36.8751	1.45013	23	no
LBT-2mm/s	9_36	487	4.4	6.1	5.68054e+16	5.84888	1.09589e+13	0.423271	323728	0.115129	487.666	16.9918	-36.8817	1.46841	22	no
LBT-2mm/s	9_37	488	4.6	6.1	5.41259e+16	5.83506	1.08169e+13	0.42624	320486	0.132236	487.893	17.038	-36.8883	1.48655	21	no
LBT-2mm/s	9_38	488	4.8	6.1	5.41259e+16	5.83525	1.08169e+13	0.42624	320488	0.149242	488.098	17.132	-36.8943	1.50307	20	no
LBT-2mm/s	9_39	488	5.1	6	5.32386e+16	5.83061	1.07687e+13	0.427261	319387	0.174495	488.275	17.2719	-36.8999	1.5184	19	no
LBT-2mm/s	9_40	488	5.3	5.8	5.1464e+16	5.82081	1.06706e+13	0.429365	317137	0.191129	488.415	17.4189	-36.9046	1.53129	17	no
LBT-2mm/s	9_41	488	5.9	6	5.32386e+16	5.83078	1.07687e+13	0.427261	319389	0.239892	488.489	17.4864	-36.9075	1.53928	15	no
LBT-2mm/s	9_42	488	6.5	6.1	5.41259e+16	5.83564	1.08169e+13	0.42624	320493	0.286734	488.538	17.5422	-36.9096	1.54497	13	no
LBT-2mm/s	9_43	488	7.9	6	5.32386e+16	5.83083	1.07687e+13	0.427261	319390	0.387822	488.574	17.5907	-36.9114	1.54995	12	no
LBT-2mm/s	9_44	488	9.2	5.9	5.23513e+16	5.82593	1.072e+13	0.428302	318272	0.471155	488.592	17.6197	-36.9125	1.55309	12	no
LBT-2mm/s	9_45	488	10.8	5.9	5.23513e+16	5.82593	1.072e+13	0.428302	318272	0.560347	488.604	17.6409	-36.9133	1.55532	11	no
LBT-2mm/s	9_46	488	12.4	5.9	5.23513e+16	5.82593	1.072e+13	0.428302	318272	0.636031	488.611	17.6579	-36.9139	1.55693	11	no
LBT-2mm/s	9_47	488	16.4	5.9	5.23513e+16	5.82593	1.072e+13	0.428302	318272	0.776319	488.617	17.6739	-36.9144	1.55839	11	no
LBT-2mm/s	9_48	488	20.3	5.9	5.23513e+16	5.82593	1.072e+13	0.428302	318272	0.863027	488.62	17.6858	-36.9149	1.55956	11	no
LBT-2mm/s	9_49	488	16.4	5.9	5.23513e+16	5.82593	1.072e+13	0.428302	318272	0.776319	488.622	17.6946	-36.9153	1.56079	12	no
LBT-2mm/s	9_50	488	12.4	5.9	5.23513e+16	5.82593	1.072e+13	0.428302	318272	0.636031	488.623	17.6978	-36.9158	1.56205	12	no
LBT-2mm/s	9_51	488	10.8	5.9	5.23513e+16	5.82593	1.072e+13	0.428302	318272	0.560347	488.62	17.6974	-36.9162	1.5633	12	no
LBT-2mm/s	9_52	488	9.2	5.9	5.23513e+16	5.82593	1.072e+13	0.428302	318272	0.471155	488.616	17.7015	-36.9166	1.56434	12	no
LBT-2mm/s	9_53	488	7.9	6	5.32386e+16	5.83083	1.07687e+13	0.427261	319390	0.387822	488.603	17.7171	-36.9172	1.56601	13	no
LBT-2mm/s	9_54	488	6.5	6.1	5.41259e+16	5.83564	1.08169e+13	0.42624	320493	0.286734	488.581	17.6969	-36.9177	1.56725	13	no
LBT-2mm/s	9_55	488	5.9	6	5.32386e+16	5.83078	1.07687e+13	0.427261	319389	0.239892	488.541	17.6319	-36.9178	1.56775	14	no
LBT-2mm/s	9_56	488	5.3	5.8	5.1464e+16	5.82081	1.06706e+13	0.429365	317137	0.191129	488.468	17.552	-36.9178	1.56754	15	no
LBT-2mm/s	9_57	488	5.1	6	5.32386e+16	5.83061	1.07687e+13	0.427261	319387	0.174495	488.343	17.4384	-36.9169	1.56521	16	no
LBT-2mm/s	9_58	488	4.8	6.1	5.41259e+16	5.83525	1.08169e+13	0.42624	320488	0.149242	488.186	17.3093	-36.9155	1.56123	17	no
LBT-2mm/s	9_59	488	4.6	6.1	5.41259e+16	5.83506	1.08169e+13	0.42624	320486	0.132236	487.994	17.1773	-36.9134	1.55556	17	no
LBT-2mm/s	9_60	487	4.4	6.1	5.68054e+16	5.84888	1.09589e+13	0.423271	323728	0.115129	487.781	17.0843	-36.9107	1.54808	18	no
LBT-2mm/s	9_61	487	4.3	6.2	5.77366e+16	5.85344	1.10071e+13	0.422277	324825	0.106548	487.56	17.0361	-36.9076	1.53966	19	no
LBT-2mm/s	9_62	487	4.2	6.2	5.77366e+16	5.85321	1.10071e+13	0.422277	324822	0.097957	487.308	16.9885	-36.9039	1.52949	19	no
LBT-2mm/s	9_63	487	4.2	6.2	5.77366e+16	5.85321	1.10071e+13	0.422277	324822	0.097957	487.101	16.9899	-36.9006	1.52029	19	no
LBT-2mm/s	9_64	486	4.1	6.1	5.96251e+16	5.86234	1.11032e+13	0.420319	327006	0.0893621	486.893	16.9746	-36.8969	1.51014	19	no
LBT-2mm/s	9_65	486	4	5.7	5.57153e+16	5.84214	1.09017e+13	0.424459	322408	0.0807714	486.703	16.981	-36.893	1.4994	20	no
LBT-2mm/s	9_66	486	3.9	5.2	5.0828e+16	5.81495	1.06348e+13	0.430139	316286	0.0721943	486.544	16.987	-36.8892	1.48881	21	no
LBT-2mm/s	9_67	486	3.8	5.6	5.47378e+16	5.83601	1.08498e+13	0.425547	321208	0.063642	486.43	17.0017	-36.8859	1.47997	22	no
LBT-2mm/s	9_68	493	3.8	5.5	3.84006e+16	5.73348	9.85949e+12	0.448051	298294	0.063642	486.412	17.0042	-36.8854	1.47845	23	no
LBT-2mm/s	9_69	486	3.8	5.4	5.27829e+16	5.82541	1.07438e+13	0.427793	318780	0.063642	486.375	17.0088	-36.8842	1.47517	24	no
LBT-2mm/s	9_70	486	3.9	5.3	5.18054e+16	5.82049	1.06897e+13	0.428953	317546	0.0721943	486.331	17.0138	-36.8827	1.47117	25	no
LBT-2mm/s	9_71	486	3.9	5.2	5.0828e+16	5.81495	1.06348e+13	0.430139	316286	0.0721943	486.268	17.0223	-36.8805	1.46502	26	no
LBT-2mm/s	9_72	486	4	5.3	5.18054e+16	5.82092	1.06897e+13	0.428953	317551	0.0807714	486.226	17.023	-36.8789	1.46061	28	no
LBT-2mm/s	9_73	486	4.1	5.3	5.18054e+16	5.82128	1.06897e+13	0.428953	317556	0.0893621	486.19	17.0198	-36.8774	1.45649	24	no
LBT-2mm/s	9_74	486	4.1	5.4	5.27829e+16	5.82672	1.07438e+13	0.427793	318797	0.0893621	486.171	17.0184	-36.8765	1.45411	23	no
LBT-2mm/s	9_75	486	4.1	5.5	5.37604e+16	5.83207	1.07971e+13	0.426658	320020	0.0893621	486.161	17.0179	-36.876	1.45269	22	no
LBT-2mm/s	9_76	486	4.3	5.9	5.76702e+16	5.85311	1.10037e+13	0.422348	324747	0.106548	486.128	17.0151	-36.8741	1.44728	22	no
LBT-2mm/s	9_77	486	4.5	6.2	6.06026e+16	5.868	1.11521e+13	0.419333	328128	0.123693	486.108	16.9812	-36.8704	1.43726	21	no
LBT-2mm/s	9_78	486	5.1	7.2	7.03772e+16	5.91254	1.16115e+13	0.410398	338523	0.174495	486.143	16.9631	-36.8671	1.42825	20	no
LBT-2mm/s	9_79	486	5.6	8.1	7.91743e+16	5.94761	1.19867e+13	0.403518	346934	0.215736	486.193	16.9581	-36.8648	1.42179	19	no
LBT-2mm/s	9_80	486	7.1	9	8.79715e+16	5.9791	1.23326e+13	0.397478	354630	0.331496	486.247	16.9535	-36.8627	1.41602	18	no
LBT-2mm/s	9_81	486	8.5	9.8	9.57912e+16	6.00462	1.26195e+13	0.392674	360972	0.427534	486.3	16.9499	-36.8607	1.41066	18	no
LBT-2mm/s	9_82	486	11.4	12.1	1.18273e+17	6.06825	1.33586e+13	0.381073	377156	0.590231	486.342	16.9474	-36.8593	1.4068	17	no
LBT-2mm/s	9_83	486	14.3	14.3	1.39777e+17	6.11914	1.3975e+13	0.372167	390484	0.7105	486.381	16.9452	-36.8582	1.40365	13	no
LBT-2mm/s	9_84	486	25.2	34.4	3.36247e+17	6.39369	1.77125e+13	0.329211	468520	0.927294	486.411	16.9435	-36.8572	1.40091	12	no
LBT-2mm/s	9_85	486	36.1	54.4	5.31739e+17	6.5419	2.00457e+13	0.309117	515198	0.983132	486.428	16.9422	-36.8558	1.39707	12	no
LBT-2mm/s	9_86	486	42	65.8	6.43169e+17	6.60443	2.11023e+13	0.301203	535902	0.992529	486.427	16.9416	-36.8544	1.39321	11	no
LBT-2mm/s	10_10	486	45.3	74.8	7.31141e+17	6.6469	2.18456e+13	0.296005	550317	0.995291	486.457	16.9395	-36.7761	1.17768	14	no
LBT-2mm/s	10_11	486	44.1	71.5	6.98885e+17	6.63192	2.1581e+13	0.297822	545200	0.994428	486.45	16.94	-36.777	1.18032	14	no
LBT-2mm/s	10_12	486	33.1	52.3	5.11212e+17	6.52903	1.98338e+13	0.310785	511013	0.974627	486.449	16.9404	-36.7787	1.18487	15	no
LBT-2mm/s	10_13	486	22.1	33.1	3.2354e+17	6.38139	1.75293e+13	0.330969	464793	0.891241	486.447	16.9408	-36.7816	1.19289	15	no
LBT-2mm/s	10_14	486	15.9	22.8	2.22861e+17	6.26355	1.58508e+13	0.348566	430207	0.76205	486.436	16.9415	-36.7844	1.20054	15	no
LBT-2mm/s	10_15	486	9.7	12.4	1.21205e+17	6.07568	1.34473e+13	0.379752	379081	0.500566	486.402	16.9439	-36.7876	1.20938	18	no
LBT-2mm/s	10_16	486	7.9	11.1	1.08498e+17	6.04213	1.30511e+13	0.38577	370450	0.387822	486.348	16.9475	-36.7916	1.22031	22	no
LBT-2mm/s	10_17	486	6.1	9.7	9.48137e+16	6.00151	1.25846e+13	0.393249	360202	0.255729	486.3	16.9503	-36.7956	1.23138	25	no
LBT-2mm/s	10_18	486	5.4	8.8	8.60166e+16	5.97227	1.2258e+13	0.398757	352973	0.199379	486.258	16.9537	-36.7999	1.24333	28	no
LBT-2mm/s	10_19	486	4.7	7.9	7.72194e+16	5.93977	1.19061e+13	0.404967	345126	0.140754	486.234	16.9631	-36.8052	1.25794	32	no
LBT-2mm/s	10_20	486	4.4	6.8	6.64673e+16	5.895	1.14337e+13	0.413787	334506	0.115129	486.261	16.9996	-36.8115	1.27519	30	no
LBT-2mm/s	10_21	486	4.1	5.7	5.57153e+16	5.84249	1.09017e+13	0.424459	322413	0.0893621	486.292	17.0185	-36.8143	1.28275	29	no
LBT-2mm/s	10_22	486	4	5.6	5.47378e+16	5.83697	1.08498e+13	0.425547	321220	0.0807714	486.304	17.0221	-36.8152	1.28543	27	no
LBT-2mm/s	10_23	486	3.9	5.5	5.37604e+16	5.83128	1.07971e+13	0.426658	320009	0.0721943	486.333	17.0172	-36.8174	1.29127	26	no
LBT-2mm/s	10_24	486	3.9	5.4	5.27829e+16	5.82593	1.07438e+13	0.427793	318787	0.0721943	486.373	17.0058	-36.8201	1.29895	24	no
LBT-2mm/s	10_25	486	3.8	5.2	5.0828e+16	5.81442	1.06348e+13	0.430139	316279	0.063642	486.435	17.012	-36.8243	1.31034	24	no
LBT-2mm/s	10_26	486	3.8	5.4	5.27829e+16	5.82541	1.07438e+13	0.427793	318780	0.063642	486.477	17.0191	-36.8271	1.31821	27	no
LBT-2mm/s	10_27	486	3.8	5.5	5.37604e+16	5.83075	1.07971e+13	0.426658	320002	0.063642	486.517	17.0122	-36.83	1.32617	30	no
LBT-2mm/s	10_28	493	3.8	5.7	3.9797e+16	5.74373	9.95503e+12	0.445721	300528	0.063642	486.541	17.0028	-36.8317	1.33082	30	no
LBT-2mm/s	10_29	486	3.8	5.8	5.66927e+16	5.84626	1.09531e+13	0.423393	323567	0.063642	486.555	16.9961	-36.8327	1.33361	30	no
LBT-2mm/s	10_30	486	3.9	6.8	6.64673e+16	5.89347	1.14337e+13	0.413787	334486	0.0721943	486.655	16.9873	-36.8397	1.35289	29	no
LBT-2mm/s	10_31	487	4.1	6.9	6.42553e+16	5.8843	1.13297e+13	0.415809	332145	0.0893621	486.784	16.9616	-36.847	1.37289	28	no
LBT-2mm/s	10_32	487	4.2	6.9	6.42553e+16	5.8846	1.13297e+13	0.415809	332148	0.097957	486.941	16.9433	-36.8541	1.39236	27	no
LBT-2mm/s	10_33	487	4.3	7.2	6.7049e+16	5.89737	1.14606e+13	0.413268	335111	0.106548	487.128	16.9487	-36.8611	1.41165	26	no
LBT-2mm/s	10_34	487	4.4	7.4	6.89115e+16	5.90565	1.15457e+13	0.411642	337033	0.115129	487.354	16.931	-36.8682	1.43125	25	no
LBT-2mm/s	10_35	487	4.5	7.3	6.79802e+16	5.9018	1.15034e+13	0.412449	336081	0.123693	487.583	16.9423	-36.8751	1.45012	24	no
LBT-2mm/s	10_36	487	4.6	7.1	6.61178e+16	5.89374	1.14174e+13	0.414101	334142	0.132236	487.81	16.985	-36.8817	1.4684	23	no
LBT-2mm/s	10_37	488	4.9	7	6.21117e+16	5.87562	1.12264e+13	0.417848	329820	0.157697	488.038	17.0315	-36.8883	1.48653	22	no
LBT-2mm/s	10_38	488	5.1	6.8	6.03371e+16	5.86722	1.11389e+13	0.419599	327834	0.174495	488.243	17.1213	-36.8943	1.5031	21	no
LBT-2mm/s	10_39	488	5.3	6.7	5.94498e+16	5.86294	1.10944e+13	0.420498	326824	0.191129	488.42	17.2576	-36.9	1.5186	20	no
LBT-2mm/s	10_40	488	5.5	6.5	5.76752e+16	5.85411	1.1004e+13	0.422342	324766	0.207582	488.562	17.3998	-36.9047	1.53167	18	no
LBT-2mm/s	10_41	488	6.1	6.6	5.85625e+16	5.85865	1.10494e+13	0.421412	325802	0.255729	488.634	17.439	-36.9077	1.53979	16	no
LBT-2mm/s	10_42	488	6.7	6.7	5.94498e+16	5.86308	1.10944e+13	0.420498	326826	0.301891	488.681	17.4969	-36.9098	1.5456	13	no
LBT-2mm/s	10_43	488	8	6.7	5.94498e+16	5.86309	1.10944e+13	0.420498	326826	0.394591	488.718	17.5666	-36.9116	1.55051	13	no
LBT-2mm/s	10_44	488	9.2	6.6	5.85625e+16	5.85868	1.10494e+13	0.421412	325803	0.471155	488.738	17.6078	-36.9127	1.55347	13	no
LBT-2mm/s	10_45	488	10.5	6.6	5.85625e+16	5.85868	1.10494e+13	0.421412	325803	0.544697	488.75	17.6347	-36.9134	1.55561	13	no
LBT-2mm/s	10_46	488	11.8	6.6	5.85625e+16	5.85868	1.10494e+13	0.421412	325803	0.609136	488.757	17.6537	-36.914	1.55725	13	no
LBT-2mm/s	10_47	488	15.9	6.6	5.85625e+16	5.85868	1.10494e+13	0.421412	325803	0.76205	488.763	17.6698	-36.9146	1.55878	13	no
LBT-2mm/s	10_48	488	19.9	6.5	5.76752e+16	5.85421	1.1004e+13	0.422342	324767	0.855874	488.766	17.6801	-36.915	1.56003	13	no
LBT-2mm/s	10_49	488	15.9	6.6	5.85625e+16	5.85868	1.10494e+13	0.421412	325803	0.76205	488.768	17.6851	-36.9155	1.56133	13	no
LBT-2mm/s	10_50	488	11.8	6.6	5.85625e+16	5.85868	1.10494e+13	0.421412	325803	0.609136	488.768	17.6824	-36.916	1.56264	13	no
LBT-2mm/s	10_51	488	10.5	6.6	5.85625e+16	5.85868	1.10494e+13	0.421412	325803	0.544697	488.765	17.6751	-36.9165	1.56392	13	no
LBT-2mm/s	10_52	488	9.2	6.6	5.85625e+16	5.85868	1.10494e+13	0.421412	325803	0.471155	488.761	17.6721	-36.9168	1.56497	13	no
LBT-2mm/s	10_53	488	8	6.7	5.94498e+16	5.86309	1.10944e+13	0.420498	326826	0.394591	488.749	17.6737	-36.9174	1.56665	13	no
LBT-2mm/s	10_54	488	6.7	6.7	5.94498e+16	5.86308	1.10944e+13	0.420498	326826	0.301891	488.726	17.6619	-36.9179	1.56785	14	no
LBT-2mm/s	10_55	488	6.1	6.6	5.85625e+16	5.85865	1.10494e+13	0.421412	325802	0.255729	488.683	17.6182	-36.9181	1.56837	15	no
LBT-2mm/s	10_56	488	5.5	6.5	5.76752e+16	5.85411	1.1004e+13	0.422342	324766	0.207582	488.609	17.5367	-36.918	1.56806	15	no
LBT-2mm/s	10_57	488	5.3	6.7	5.94498e+16	5.86294	1.10944e+13	0.420498	326824	0.191129	488.486	17.4294	-36.917	1.5655	16	no
LBT-2mm/s	10_58	488	5.1	6.8	6.03371e+16	5.86722	1.11389e+13	0.419599	327834	0.174495	488.328	17.2978	-36.9156	1.56145	17	no
LBT-2mm/s	10_59	488	4.9	7	6.21117e+16	5.87562	1.12264e+13	0.417848	329820	0.157697	488.137	17.1753	-36.9134	1.55551	18	no
LBT-2mm/s	10_60	487	4.6	7.1	6.61178e+16	5.89374	1.14174e+13	0.414101	334142	0.132236	487.928	17.064	-36.9107	1.5482	19	no
LBT-2mm/s	10_61	487	4.5	7.3	6.79802e+16	5.9018	1.15034e+13	0.412449	336081	0.123693	487.705	17.0154	-36.9076	1.53963	20	no
LBT-2mm/s	10_62	487	4.4	7.4	6.89115e+16	5.90565	1.15457e+13	0.411642	337033	0.115129	487.455	16.9708	-36.9039	1.52948	20	no
LBT-2mm/s	10_63	487	4.3	7.2	6.7049e+16	5.89737	1.14606e+13	0.413268	335111	0.106548	487.251	16.9625	-36.9006	1.52032	20	no
LBT-2mm/s	10_64	487	4.2	6.9	6.42553e+16	5.8846	1.13297e+13	0.415809	332148	0.097957	487.045	16.9557	-36.8969	1.51013	20	no
LBT-2mm/s	10_65	487	4.1	6.9	6.42553e+16	5.8843	1.13297e+13	0.415809	332145	0.0893621	486.87	16.9564	-36.893	1.49936	20	no
LBT-2mm/s	10_66	486	3.9	6.8	6.64673e+16	5.89347	1.14337e+13	0.413787	334486	0.0721943	486.729	16.978	-36.8891	1.48873	22	no
LBT-2mm/s	10_67	486	3.8	5.8	5.66927e+16	5.84626	1.09531e+13	0.423393	323567	0.063642	486.633	16.9927	-36.8859	1.47979	23	no
LBT-2mm/s	10_68	493	3.8	5.7	3.9797e+16	5.74373	9.95503e+12	0.445721	300528	0.063642	486.618	16.9943	-36.8853	1.47826	24	no
LBT-2mm/s	10_69	486	3.8	5.5	5.37604e+16	5.83075	1.07971e+13	0.426658	320002	0.063642	486.587	17.0007	-36.8841	1.47494	26	no
LBT-2mm/s	10_70	486	3.8	5.4	5.27829e+16	5.82541	1.07438e+13	0.427793	318780	0.063642	486.548	17.0099	-36.8826	1.47089	27	no
LBT-2mm/s	10_71	486	3.8	5.2	5.0828e+16	5.81442	1.06348e+13	0.430139	316279	0.063642	486.488	17.0261	-36.8804	1.4646	28	no
LBT-2mm/s	10_72	486	3.9	5.4	5.27829e+16	5.82593	1.07438e+13	0.427793	318787	0.0721943	486.443	17.0251	-36.8787	1.46017	30	no
LBT-2mm/s	10_73	486	3.9	5.5	5.37604e+16	5.83128	1.07971e+13	0.426658	320009	0.0721943	486.4	17.0225	-36.8773	1.4561	28	no
LBT-2mm/s	10_74	486	4	5.6	5.47378e+16	5.83697	1.08498e+13	0.425547	321220	0.0807714	486.374	17.0233	-36.8764	1.45375	27	no
LBT-2mm/s	10_75	486	4.1	5.7	5.57153e+16	5.84249	1.09017e+13	0.424459	322413	0.0893621	486.359	17.0234	-36.8759	1.45235	26	no
LBT-2mm/s	10_76	486	4.4	6.8	6.64673e+16	5.895	1.14337e+13	0.413787	334506	0.115129	486.305	17.0174	-36.874	1.44701	24	no
LBT-2mm/s	10_77	486	4.7	7.9	7.72194e+16	5.93977	1.19061e+13	0.404967	345126	0.140754	486.238	16.9756	-36.8703	1.43707	23	no
LBT-2mm/s	10_78	486	5.4	8.8	8.60166e+16	5.97227	1.2258e+13	0.398757	352973	0.199379	486.243	16.9565	-36.8671	1.42809	22	no
LBT-2mm/s	10_79	486	6.1	9.7	9.48137e+16	6.00151	1.25846e+13	0.393249	360202	0.255729	486.278	16.9529	-36.8647	1.42162	21	no
LBT-2mm/s	10_80	486	7.9	11.1	1.08498e+17	6.04213	1.30511e+13	0.38577	370450	0.387822	486.323	16.9493	-36.8626	1.41588	19	no
LBT-2mm/s	10_81	486	9.7	12.4	1.21205e+17	6.07568	1.34473e+13	0.379752	379081	0.500566	486.366	16.9468	-36.8607	1.41058	18	no
LBT-2mm/s	10_82	486	15.9	22.8	2.22861e+17	6.26355	1.58508e+13	0.348566	430207	0.76205	486.398	16.945	-36.8593	1.40673	17	no
LBT-2mm/s	10_83	486	22.1	33.1	3.2354e+17	6.38139	1.75293e+13	0.330969	464793	0.891241	486.427	16.9433	-36.8581	1.40339	14	no
LBT-2mm/s	10_84	486	33.1	52.3	5.11212e+17	6.52903	1.98338e+13	0.310785	511013	0.974627	486.446	16.9419	-36.857	1.40022	13	no
LBT-2mm/s	10_85	486	44.1	71.5	6.98885e+17	6.63192	2.1581e+13	0.297822	545200	0.994428	486.446	16.941	-36.8553	1.39575	12	no
LBT-2mm/s	11_12	486	41.7	72.3	7.06704e+17	6.63561	2.1646e+13	0.297373	546458	0.992211	486.453	16.9399	-36.7787	1.18503	13	no
LBT-2mm/s	11_13	486	36.5	65.6	6.41214e+17	6.60342	2.1085e+13	0.301327	535565	0.98403	486.451	16.9404	-36.7813	1.19207	14	no
LBT-2mm/s	11_14	486	24.5	42	4.10534e+17	6.45783	1.86933e+13	0.320275	488312	0.920328	486.454	16.9405	-36.7842	1.19994	14	no
LBT-2mm/s	11_15	486	12.4	18.4	1.79853e+17	6.19676	1.49593e+13	0.359187	411478	0.636031	486.442	16.9419	-36.7875	1.20922	16	no
LBT-2mm/s	11_16	486	9.5	15	1.46619e+17	6.13378	1.41565e+13	0.369664	394381	0.488973	486.398	16.9448	-36.7915	1.22023	19	no
LBT-2mm/s	11_17	486	6.6	11.6	1.13385e+17	6.05544	1.32073e+13	0.383362	373860	0.294341	486.356	16.9471	-36.7955	1.23125	22	no
LBT-2mm/s	11_18	486	5.9	11.7	1.14363e+17	6.05801	1.32379e+13	0.382895	374527	0.239892	486.322	16.9508	-36.7999	1.2432	25	no
LBT-2mm/s	11_19	486	5.2	11.8	1.1534e+17	6.06045	1.32684e+13	0.382433	375189	0.182834	486.312	16.9575	-36.8052	1.25779	31	no
LBT-2mm/s	11_20	486	4.7	9.7	9.48137e+16	6.00104	1.25846e+13	0.393249	360196	0.140754	486.368	17.0178	-36.8114	1.27493	30	no
LBT-2mm/s	11_21	486	4.2	7.5	7.33096e+16	5.92351	1.17402e+13	0.407998	341400	0.097957	486.416	17.0367	-36.8141	1.28244	29	no
LBT-2mm/s	11_22	486	4.2	7.3	7.13546e+16	5.91551	1.16549e+13	0.409585	339483	0.097957	486.434	17.0409	-36.8151	1.28511	28	no
LBT-2mm/s	11_23	486	4.1	7.1	6.93997e+16	5.90701	1.15678e+13	0.411224	337519	0.0893621	486.474	17.0449	-36.8172	1.29094	28	no
LBT-2mm/s	11_24	486	4	6.3	6.158e+16	5.87145	1.12004e+13	0.418366	329208	0.0807714	486.526	17.0443	-36.82	1.29865	27	no
LBT-2mm/s	11_25	486	3.8	5.5	5.37604e+16	5.83075	1.07971e+13	0.426658	320002	0.063642	486.597	17.0593	-36.8242	1.31016	27	no
LBT-2mm/s	11_26	486	3.8	5.7	5.57153e+16	5.84118	1.09017e+13	0.424459	322396	0.063642	486.64	17.067	-36.8271	1.31811	27	no
LBT-2mm/s	11_27	486	3.8	5.9	5.76702e+16	5.85126	1.10037e+13	0.422348	324723	0.063642	486.679	17.0528	-36.83	1.32608	30	no
LBT-2mm/s	11_28	493	3.8	6.2	4.3288e+16	5.76793	1.01836e+13	0.440292	305853	0.063642	486.699	17.0254	-36.8317	1.33068	33	no
LBT-2mm/s	11_29	486	3.8	6.4	6.25575e+16	5.8751	1.12481e+13	0.417417	330278	0.063642	486.71	17.0045	-36.8327	1.33343	33	no
LBT-2mm/s	11_30	486	4.1	8.3	8.11293e+16	5.95331	1.20659e+13	0.40211	348680	0.0893621	486.784	16.9717	-36.8397	1.35285	32	no
LBT-2mm/s	11_31	487	4.2	8.4	7.82238e+16	5.94276	1.19477e+13	0.404217	346045	0.097957	486.895	16.9417	-36.847	1.37285	31	no
LBT-2mm/s	11_32	487	4.3	8.5	7.91551e+16	5.94652	1.19859e+13	0.403532	346903	0.106548	487.041	16.9216	-36.8541	1.39232	29	no
LBT-2mm/s	11_33	487	4.6	8.8	8.19488e+16	5.95734	1.20987e+13	0.401531	349424	0.132236	487.223	16.9255	-36.8611	1.41164	28	no
LBT-2mm/s	11_34	487	4.9	9.1	8.47425e+16	5.9676	1.22087e+13	0.399609	351875	0.157697	487.449	16.9208	-36.8682	1.43122	27	no
LBT-2mm/s	11_35	488	4.9	8.7	7.7196e+16	5.93984	1.19051e+13	0.404984	345107	0.157697	487.678	16.9351	-36.8751	1.45011	26	no
LBT-2mm/s	11_36	488	4.8	8.2	7.27594e+16	5.92221	1.17164e+13	0.40844	340877	0.149242	487.909	16.984	-36.8817	1.46841	25	no
LBT-2mm/s	11_37	488	5.1	7.9	7.00975e+16	5.91137	1.15991e+13	0.410633	338242	0.174495	488.141	17.0363	-36.8883	1.48653	24	no
LBT-2mm/s	11_38	488	5.3	7.6	6.74356e+16	5.90001	1.14784e+13	0.412926	335525	0.191129	488.346	17.1198	-36.8944	1.50326	23	no
LBT-2mm/s	11_39	488	5.6	7.4	6.5661e+16	5.89221	1.13961e+13	0.414515	333666	0.215736	488.524	17.2533	-36.9	1.51875	21	no
LBT-2mm/s	11_40	488	5.8	7.2	6.38863e+16	5.88417	1.13121e+13	0.416154	331767	0.231892	488.669	17.3856	-36.9049	1.53216	19	no
LBT-2mm/s	11_41	488	6.5	7.3	6.47736e+16	5.88827	1.13543e+13	0.415328	332722	0.286734	488.739	17.4302	-36.9079	1.54029	16	no
LBT-2mm/s	11_42	488	7.1	7.4	6.5661e+16	5.89229	1.13961e+13	0.414515	333667	0.331496	488.787	17.4889	-36.91	1.54614	13	no
LBT-2mm/s	11_43	488	8.3	7.5	6.65483e+16	5.89625	1.14375e+13	0.413714	334602	0.414537	488.823	17.5579	-36.9118	1.55112	13	no
LBT-2mm/s	11_44	488	9.5	7.5	6.65483e+16	5.89625	1.14375e+13	0.413714	334602	0.488973	488.844	17.5986	-36.9129	1.55411	13	no
LBT-2mm/s	11_45	488	11.1	7.5	6.65483e+16	5.89625	1.14375e+13	0.413714	334602	0.575522	488.855	17.6233	-36.9137	1.55629	13	no
LBT-2mm/s	11_46	488	12.7	7.5	6.65483e+16	5.89625	1.14375e+13	0.413714	334602	0.648842	488.862	17.6403	-36.9143	1.55799	13	no
LBT-2mm/s	11_47	488	14.3	7.7	6.83229e+16	5.90401	1.1519e+13	0.41215	336443	0.7105	488.868	17.6538	-36.9149	1.55957	13	no
LBT-2mm/s	11_48	488	15.8	7.8	6.92102e+16	5.90782	1.15592e+13	0.411386	337348	0.759096	488.872	17.6618	-36.9153	1.56087	13	no
LBT-2mm/s	11_49	488	14.3	7.7	6.83229e+16	5.90401	1.1519e+13	0.41215	336443	0.7105	488.874	17.6643	-36.9158	1.56219	13	no
LBT-2mm/s	11_50	488	12.7	7.5	6.65483e+16	5.89625	1.14375e+13	0.413714	334602	0.648842	488.874	17.6602	-36.9163	1.56352	13	no
LBT-2mm/s	11_51	488	11.1	7.5	6.65483e+16	5.89625	1.14375e+13	0.413714	334602	0.575522	488.87	17.6541	-36.9168	1.5648	13	no
LBT-2mm/s	11_52	488	9.5	7.5	6.65483e+16	5.89625	1.14375e+13	0.413714	334602	0.488973	488.867	17.6561	-36.9172	1.56586	13	no
LBT-2mm/s	11_53	488	8.3	7.5	6.65483e+16	5.89625	1.14375e+13	0.413714	334602	0.414537	488.855	17.6623	-36.9178	1.56752	13	no
LBT-2mm/s	11_54	488	7.1	7.4	6.5661e+16	5.89229	1.13961e+13	0.414515	333667	0.331496	488.831	17.6487	-36.9182	1.56864	14	no
LBT-2mm/s	11_55	488	6.5	7.3	6.47736e+16	5.88827	1.13543e+13	0.415328	332722	0.286734	488.786	17.6085	-36.9184	1.56919	15	no
LBT-2mm/s	11_56	488	5.8	7.2	6.38863e+16	5.88417	1.13121e+13	0.416154	331767	0.231892	488.712	17.5415	-36.9182	1.56874	16	no
LBT-2mm/s	11_57	488	5.6	7.4	6.5661e+16	5.89221	1.13961e+13	0.414515	333666	0.215736	488.59	17.4243	-36.9172	1.56602	17	no
LBT-2mm/s	11_58	488	5.3	7.6	6.74356e+16	5.90001	1.14784e+13	0.412926	335525	0.191129	488.432	17.2972	-36.9156	1.5617	18	no
LBT-2mm/s	11_59	488	5.1	7.9	7.00975e+16	5.91137	1.15991e+13	0.410633	338242	0.174495	488.239	17.1781	-36.9134	1.5556	19	no
LBT-2mm/s	11_60	488	4.8	8.2	7.27594e+16	5.92221	1.17164e+13	0.40844	340877	0.149242	488.027	17.0717	-36.9107	1.54819	20	no
LBT-2mm/s	11_61	488	4.9	8.7	7.7196e+16	5.93984	1.19051e+13	0.404984	345107	0.157697	487.802	17.0135	-36.9076	1.53958	21	no
LBT-2mm/s	11_62	487	4.9	9.1	8.47425e+16	5.9676	1.22087e+13	0.399609	351875	0.157697	487.552	16.9609	-36.9039	1.52949	21	no
LBT-2mm/s	11_63	487	4.6	8.8	8.19488e+16	5.95734	1.20987e+13	0.401531	349424	0.132236	487.347	16.9445	-36.9006	1.52033	21	no
LBT-2mm/s	11_64	487	4.3	8.5	7.91551e+16	5.94652	1.19859e+13	0.403532	346903	0.106548	487.143	16.9401	-36.8969	1.5101	20	no
LBT-2mm/s	11_65	487	4.2	8.4	7.82238e+16	5.94276	1.19477e+13	0.404217	346045	0.097957	486.971	16.9347	-36.893	1.49934	21	no
LBT-2mm/s	11_66	486	4.1	8.3	8.11293e+16	5.95331	1.20659e+13	0.40211	348680	0.0893621	486.848	16.9601	-36.8891	1.48864	23	no
LBT-2mm/s	11_67	486	3.8	6.4	6.25575e+16	5.8751	1.12481e+13	0.417417	330278	0.063642	486.773	16.9718	-36.8858	1.4796	24	no
LBT-2mm/s	11_68	493	3.8	6.2	4.3288e+16	5.76793	1.01836e+13	0.440292	305853	0.063642	486.762	16.9784	-36.8852	1.47805	26	no
LBT-2mm/s	11_69	486	3.8	5.9	5.76702e+16	5.85126	1.10037e+13	0.422348	324723	0.063642	486.737	17.0061	-36.884	1.47474	27	no
LBT-2mm/s	11_70	486	3.8	5.7	5.57153e+16	5.84118	1.09017e+13	0.424459	322396	0.063642	486.703	17.0365	-36.8826	1.4707	29	no
LBT-2mm/s	11_71	486	3.8	5.5	5.37604e+16	5.83075	1.07971e+13	0.426658	320002	0.063642	486.649	17.0279	-36.8802	1.46429	31	no
LBT-2mm/s	11_72	486	4	6.3	6.158e+16	5.87145	1.12004e+13	0.418366	329208	0.0807714	486.603	17.0241	-36.8786	1.45978	32	no
LBT-2mm/s	11_73	486	4.1	7.1	6.93997e+16	5.90701	1.15678e+13	0.411224	337519	0.0893621	486.554	17.048	-36.8771	1.45575	28	no
LBT-2mm/s	11_74	486	4.2	7.3	7.13546e+16	5.91551	1.16549e+13	0.409585	339483	0.097957	486.523	17.0566	-36.8763	1.4534	26	no
LBT-2mm/s	11_75	486	4.2	7.5	7.33096e+16	5.92351	1.17402e+13	0.407998	341400	0.097957	486.504	17.0578	-36.8758	1.452	24	no
LBT-2mm/s	11_76	486	4.7	9.7	9.48137e+16	6.00104	1.25846e+13	0.393249	360196	0.140754	486.432	17.0449	-36.8738	1.44668	22	no
LBT-2mm/s	11_77	486	5.2	11.8	1.1534e+17	6.06045	1.32684e+13	0.382433	375189	0.182834	486.328	16.9733	-36.8703	1.43693	20	no
LBT-2mm/s	11_78	486	5.9	11.7	1.14363e+17	6.05801	1.32379e+13	0.382895	374527	0.239892	486.311	16.9521	-36.867	1.42798	18	no
LBT-2mm/s	11_79	486	6.6	11.6	1.13385e+17	6.05544	1.32073e+13	0.383362	373860	0.294341	486.338	16.9492	-36.8647	1.42151	16	no
LBT-2mm/s	11_80	486	9.5	15	1.46619e+17	6.13378	1.41565e+13	0.369664	394381	0.488973	486.375	16.9464	-36.8626	1.41581	14	no
LBT-2mm/s	11_81	486	12.4	18.4	1.79853e+17	6.19676	1.49593e+13	0.359187	411478	0.636031	486.412	16.9442	-36.8607	1.41052	12	no
LBT-2mm/s	11_82	486	24.5	42	4.10534e+17	6.45783	1.86933e+13	0.320275	488312	0.920328	486.429	16.9432	-36.8592	1.40637	12	no
LBT-2mm/s	11_83	486	36.5	65.6	6.41214e+17	6.60342	2.1085e+13	0.301327	535565	0.98403	486.438	16.9425	-36.8578	1.40255	12	no
LBT-2mm/s	11_84	486	41.7	72.3	7.06704e+17	6.63561	2.1646e+13	0.297373	546458	0.992211	486.444	16.9417	-36.8566	1.39915	11	no
LBT-2mm/s	12_13	486	45.8	87.9	8.59188e+17	6.70075	2.28185e+13	0.289611	569012	0.995611	486.454	16.9401	-36.7813	1.19218	13	no
LBT-2mm/s	12_14	486	32.7	61	5.96251e+17	6.57946	2.06752e+13	0.304325	527562	0.973216	486.456	16.9404	-36.784	1.19956	13	no
LBT-2mm/s	12_15	486	19.5	34.1	3.33314e+17	6.39089	1.76707e+13	0.329609	467670	0.848366	486.458	16.9409	-36.7875	1.20902	15	no
LBT-2mm/s	12_16	486	13.6	24.9	2.43388e+17	6.29121	1.62324e+13	0.344309	438145	0.684859	486.422	16.9433	-36.7915	1.22013	17	no
LBT-2mm/s	12_17	486	7.7	15.7	1.53461e+17	6.14779	1.43319e+13	0.367294	398136	0.374103	486.392	16.9453	-36.7955	1.23117	19	no
LBT-2mm/s	12_18	486	6.8	16	1.56394e+17	6.1536	1.44053e+13	0.366316	399705	0.309381	486.361	16.9505	-36.7998	1.24311	27	no
LBT-2mm/s	12_19	486	5.8	16.3	1.59326e+17	6.15927	1.44777e+13	0.365359	401250	0.231892	486.362	16.9563	-36.8052	1.25771	29	no
LBT-2mm/s	12_20	486	5.1	13.2	1.29025e+17	6.09448	1.36762e+13	0.376403	384038	0.174495	486.446	17.0399	-36.8113	1.27474	30	no
LBT-2mm/s	12_21	486	4.3	10.1	9.87236e+16	6.01257	1.27226e+13	0.39099	363229	0.106548	486.507	17.0734	-36.814	1.28213	31	no
LBT-2mm/s	12_22	486	4.2	8.9	8.6994e+16	5.97442	1.22955e+13	0.398113	353788	0.097957	486.528	17.0868	-36.815	1.28476	33	no
LBT-2mm/s	12_23	486	4.1	7.7	7.52645e+16	5.93102	1.18239e+13	0.406459	343273	0.0893621	486.575	17.1154	-36.8171	1.29058	30	no
LBT-2mm/s	12_24	486	4	6.8	6.64673e+16	5.89391	1.14337e+13	0.413787	334491	0.0807714	486.634	17.1524	-36.8199	1.29834	30	no
LBT-2mm/s	12_25	486	3.8	5.9	5.76702e+16	5.85126	1.10037e+13	0.422348	324723	0.063642	486.71	17.1794	-36.8241	1.3099	30	no
LBT-2mm/s	12_26	486	3.8	6.3	6.158e+16	5.87048	1.12004e+13	0.418366	329195	0.063642	486.754	17.1891	-36.827	1.31793	30	no
LBT-2mm/s	12_27	486	3.8	6.7	6.54899e+16	5.88858	1.13881e+13	0.414671	333447	0.063642	486.79	17.1707	-36.83	1.32603	32	no
LBT-2mm/s	12_28	493	3.9	7.8	5.44591e+16	5.83505	1.08348e+13	0.425861	320873	0.0721943	486.807	17.1226	-36.8317	1.33068	32	no
LBT-2mm/s	12_29	486	3.9	8.9	8.6994e+16	5.97331	1.22955e+13	0.398113	353773	0.0721943	486.815	17.082	-36.8327	1.33341	35	no
LBT-2mm/s	12_30	486	4.3	12.1	1.18273e+17	6.06713	1.33586e+13	0.381073	377140	0.106548	486.864	16.9376	-36.8397	1.35265	34	no
LBT-2mm/s	12_31	487	4.6	11.8	1.09886e+17	6.04536	1.3096e+13	0.385074	371422	0.132236	486.962	16.9264	-36.847	1.37278	33	no
LBT-2mm/s	12_32	487	4.8	11.5	1.07092e+17	6.03778	1.30052e+13	0.386486	369440	0.149242	487.1	16.9116	-36.8541	1.39227	32	no
LBT-2mm/s	12_33	487	5	10.9	1.01505e+17	6.02176	1.28184e+13	0.389445	365346	0.166115	487.279	16.9155	-36.8611	1.41162	30	no
LBT-2mm/s	12_34	487	5.2	10.3	9.59173e+16	6.00483	1.26239e+13	0.3926	361068	0.182834	487.503	16.9177	-36.8682	1.43124	29	no
LBT-2mm/s	12_35	488	5.4	10.5	9.31676e+16	5.99616	1.25252e+13	0.394233	358890	0.199379	487.73	16.9331	-36.8751	1.45018	28	no
LBT-2mm/s	12_36	488	5.5	10.7	9.49422e+16	6.00184	1.25892e+13	0.393173	360303	0.207582	487.97	16.9827	-36.8818	1.46846	27	no
LBT-2mm/s	12_37	488	5.8	10.6	9.40549e+16	5.99907	1.25573e+13	0.3937	359600	0.231892	488.206	17.0461	-36.8883	1.48653	25	no
LBT-2mm/s	12_38	488	6.1	10.4	9.22803e+16	5.99339	1.24929e+13	0.394772	358177	0.255729	488.411	17.1205	-36.8945	1.50339	24	no
LBT-2mm/s	12_39	488	6.4	10	8.8731e+16	5.98166	1.23613e+13	0.39699	355265	0.279068	488.588	17.2534	-36.9001	1.51892	23	no
LBT-2mm/s	12_40	488	6.6	9.5	8.42945e+16	5.96634	1.21913e+13	0.399913	351492	0.294341	488.734	17.3876	-36.905	1.53252	20	no
LBT-2mm/s	12_41	488	7.4	9.9	8.78437e+16	5.97867	1.23278e+13	0.397561	354523	0.353071	488.806	17.4366	-36.908	1.54072	17	no
LBT-2mm/s	12_42	488	8.1	10.2	9.05056e+16	5.9876	1.24275e+13	0.395868	356733	0.4013	488.853	17.4898	-36.9102	1.54669	14	no
LBT-2mm/s	12_43	488	9.6	10.3	9.1393e+16	5.99052	1.24603e+13	0.395317	357458	0.494798	488.89	17.5578	-36.912	1.55178	13	no
LBT-2mm/s	12_44	488	11.1	10.4	9.22803e+16	5.99342	1.24929e+13	0.394772	358178	0.575522	488.91	17.5961	-36.9132	1.55486	13	no
LBT-2mm/s	12_45	488	13	10.7	9.49422e+16	6.00194	1.25892e+13	0.393173	360304	0.661244	488.919	17.6169	-36.914	1.55712	13	no
LBT-2mm/s	12_46	488	14.8	10.9	9.67168e+16	6.0075	1.26523e+13	0.392136	361695	0.727624	488.925	17.6299	-36.9146	1.55885	13	no
LBT-2mm/s	12_47	488	16.1	10.8	9.58295e+16	6.00474	1.26208e+13	0.392652	361002	0.767856	488.932	17.64	-36.9152	1.56045	13	no
LBT-2mm/s	12_48	488	17.4	10.6	9.40549e+16	5.99913	1.25573e+13	0.3937	359600	0.80249	488.937	17.646	-36.9157	1.56176	13	no
LBT-2mm/s	12_49	488	16.1	10.8	9.58295e+16	6.00474	1.26208e+13	0.392652	361002	0.767856	488.94	17.6497	-36.9162	1.56309	13	no
LBT-2mm/s	12_50	488	14.8	10.9	9.67168e+16	6.0075	1.26523e+13	0.392136	361695	0.727624	488.94	17.6516	-36.9166	1.56441	13	no
LBT-2mm/s	12_51	488	13	10.7	9.49422e+16	6.00194	1.25892e+13	0.393173	360304	0.661244	488.936	17.6545	-36.9171	1.56568	13	no
LBT-2mm/s	12_52	488	11.1	10.4	9.22803e+16	5.99342	1.24929e+13	0.394772	358178	0.575522	488.933	17.6602	-36.9175	1.56669	13	no
LBT-2mm/s	12_53	488	9.6	10.3	9.1393e+16	5.99052	1.24603e+13	0.395317	357458	0.494798	488.921	17.6632	-36.918	1.56823	13	no
LBT-2mm/s	12_54	488	8.1	10.2	9.05056e+16	5.9876	1.24275e+13	0.395868	356733	0.4013	488.895	17.6457	-36.9184	1.56927	14	no
LBT-2mm/s	12_55	488	7.4	9.9	8.78437e+16	5.97867	1.23278e+13	0.397561	354523	0.353071	488.85	17.6082	-36.9186	1.56982	15	no
LBT-2mm/s	12_56	488	6.6	9.5	8.42945e+16	5.96634	1.21913e+13	0.399913	351492	0.294341	488.777	17.5398	-36.9184	1.56932	16	no
LBT-2mm/s	12_57	488	6.4	10	8.8731e+16	5.98166	1.23613e+13	0.39699	355265	0.279068	488.655	17.4238	-36.9174	1.56651	18	no
LBT-2mm/s	12_58	488	6.1	10.4	9.22803e+16	5.99339	1.24929e+13	0.394772	358177	0.255729	488.496	17.2996	-36.9157	1.56194	19	no
LBT-2mm/s	12_59	488	5.8	10.6	9.40549e+16	5.99907	1.25573e+13	0.3937	359600	0.231892	488.3	17.1779	-36.9135	1.55573	20	no
LBT-2mm/s	12_60	488	5.5	10.7	9.49422e+16	6.00184	1.25892e+13	0.393173	360303	0.207582	488.09	17.0813	-36.9108	1.54825	21	no
LBT-2mm/s	12_61	488	5.4	10.5	9.31676e+16	5.99616	1.25252e+13	0.394233	358890	0.199379	487.862	17.0149	-36.9076	1.53964	23	no
LBT-2mm/s	12_62	487	5.2	10.3	9.59173e+16	6.00483	1.26239e+13	0.3926	361068	0.182834	487.612	16.9593	-36.9039	1.5295	23	no
LBT-2mm/s	12_63	487	5	10.9	1.01505e+17	6.02176	1.28184e+13	0.389445	365346	0.166115	487.404	16.9384	-36.9006	1.52034	22	no
LBT-2mm/s	12_64	487	4.8	11.5	1.07092e+17	6.03778	1.30052e+13	0.386486	369440	0.149242	487.202	16.9321	-36.8969	1.51007	21	no
LBT-2mm/s	12_65	487	4.6	11.8	1.09886e+17	6.04536	1.3096e+13	0.385074	371422	0.132236	487.031	16.9239	-36.893	1.49931	22	no
LBT-2mm/s	12_66	486	4.3	12.1	1.18273e+17	6.06713	1.33586e+13	0.381073	377140	0.106548	486.924	16.9426	-36.8891	1.48857	23	no
LBT-2mm/s	12_67	486	3.9	8.9	8.6994e+16	5.97331	1.22955e+13	0.398113	353773	0.0721943	486.866	16.9509	-36.8857	1.47942	25	no
LBT-2mm/s	12_68	493	3.9	7.8	5.44591e+16	5.83505	1.08348e+13	0.425861	320873	0.0721943	486.858	16.9692	-36.8852	1.47788	27	no
LBT-2mm/s	12_69	486	3.8	6.7	6.54899e+16	5.88858	1.13881e+13	0.414671	333447	0.063642	486.838	17.027	-36.884	1.47457	29	no
LBT-2mm/s	12_70	486	3.8	6.3	6.158e+16	5.87048	1.12004e+13	0.418366	329195	0.063642	486.811	17.0868	-36.8825	1.47051	31	no
LBT-2mm/s	12_71	486	3.8	5.9	5.76702e+16	5.85126	1.10037e+13	0.422348	324723	0.063642	486.761	17.0774	-36.8801	1.46402	33	no
LBT-2mm/s	12_72	486	4	6.8	6.64673e+16	5.89391	1.14337e+13	0.413787	334491	0.0807714	486.715	17.0664	-36.8785	1.45944	34	no
LBT-2mm/s	12_73	486	4.1	7.7	7.52645e+16	5.93102	1.18239e+13	0.406459	343273	0.0893621	486.664	17.1015	-36.877	1.45547	30	no
LBT-2mm/s	12_74	486	4.2	8.9	8.6994e+16	5.97442	1.22955e+13	0.398113	353788	0.097957	486.63	17.1096	-36.8762	1.4531	28	no
LBT-2mm/s	12_75	486	4.3	10.1	9.87236e+16	6.01257	1.27226e+13	0.39099	363229	0.106548	486.608	17.1096	-36.8757	1.45167	26	no
LBT-2mm/s	12_76	486	5.1	13.2	1.29025e+17	6.09448	1.36762e+13	0.376403	384038	0.174495	486.524	17.0853	-36.8737	1.4463	24	no
LBT-2mm/s	12_77	486	5.8	16.3	1.59326e+17	6.15927	1.44777e+13	0.365359	401250	0.231892	486.387	16.9729	-36.8703	1.43686	22	no
LBT-2mm/s	12_78	486	6.8	16	1.56394e+17	6.1536	1.44053e+13	0.366316	399705	0.309381	486.353	16.9512	-36.867	1.4279	20	no
LBT-2mm/s	12_79	486	7.7	15.7	1.53461e+17	6.14779	1.43319e+13	0.367294	398136	0.374103	486.378	16.9472	-36.8647	1.42145	17	no
LBT-2mm/s	12_80	486	13.6	24.9	2.43388e+17	6.29121	1.62324e+13	0.344309	438145	0.684859	486.402	16.9448	-36.8626	1.41574	15	no
LBT-2mm/s	12_81	486	19.5	34.1	3.33314e+17	6.39089	1.76707e+13	0.329609	467670	0.848366	486.428	16.9433	-36.8607	1.41042	13	no
LBT-2mm/s	12_82	486	32.7	61	5.96251e+17	6.57946	2.06752e+13	0.304325	527562	0.973216	486.437	16.9425	-36.8591	1.40615	13	no
LBT-2mm/s	12_83	486	45.8	87.9	8.59188e+17	6.70075	2.28185e+13	0.289611	569012	0.995611	486.44	16.9419	-36.8577	1.40228	12	no
LBT-2mm/s	13_14	486	42.5	97.1	9.49115e+17	6.73418	2.34401e+13	0.285748	580857	0.993032	486.458	16.9399	-36.784	1.19959	11	no
LBT-2mm/s	13_15	486	26.8	58.9	5.75724e+17	6.56795	2.04805e+13	0.305781	523748	0.941085	486.457	16.9407	-36.7874	1.20877	13	no
LBT-2mm/s	13_16	486	17.7	38.8	3.79255e+17	6.43229	1.82976e+13	0.323788	480357	0.809762	486.435	16.9422	-36.7914	1.21997	14	no
LBT-2mm/s	13_17	486	8.6	18.7	1.82785e+17	6.20177	1.50247e+13	0.358373	412863	0.433943	486.423	16.9434	-36.7955	1.23109	16	no
LBT-2mm/s	13_18	486	7.4	19	1.85718e+17	6.20671	1.50894e+13	0.357574	414229	0.353071	486.389	16.9496	-36.7998	1.243	18	no
LBT-2mm/s	13_19	486	6.1	19.3	1.8865e+17	6.21154	1.51534e+13	0.356789	415579	0.255729	486.4	16.9536	-36.8051	1.25761	26	no
LBT-2mm/s	13_20	486	5.4	17.1	1.67146e+17	6.17397	1.46662e+13	0.362904	405262	0.199379	486.528	17.0879	-36.8112	1.27444	29	no
LBT-2mm/s	13_21	486	4.7	14.9	1.45642e+17	6.13123	1.41309e+13	0.370013	393826	0.140754	486.611	17.1644	-36.8138	1.28152	30	no
LBT-2mm/s	13_22	486	4.5	12.6	1.2316e+17	6.07979	1.35055e+13	0.378891	380334	0.123693	486.637	17.1909	-36.8147	1.28411	31	no
LBT-2mm/s	13_23	486	4.2	10.3	1.00678e+17	6.01822	1.27902e+13	0.389899	364711	0.097957	486.692	17.2537	-36.8169	1.28993	32	no
LBT-2mm/s	13_24	486	4	8.4	8.21067e+16	5.95651	1.2105e+13	0.401421	349545	0.0807714	486.756	17.3485	-36.8197	1.29774	32	no
LBT-2mm/s	13_25	486	3.8	6.4	6.25575e+16	5.8751	1.12481e+13	0.417417	330278	0.063642	486.835	17.4263	-36.8239	1.30929	33	no
LBT-2mm/s	13_26	486	3.8	7	6.84223e+16	5.90149	1.15235e+13	0.412064	336505	0.063642	486.879	17.4366	-36.8268	1.31737	34	no
LBT-2mm/s	13_27	486	3.8	7.6	7.4287e+16	5.9258	1.17823e+13	0.407223	342321	0.063642	486.91	17.4038	-36.8299	1.32577	36	no
LBT-2mm/s	13_28	493	4	8.9	6.21392e+16	5.8741	1.12277e+13	0.417821	329829	0.0807714	486.922	17.3382	-36.8317	1.33067	38	no
LBT-2mm/s	13_29	486	4.1	10.2	9.9701e+16	6.01499	1.27565e+13	0.390441	363967	0.0893621	486.926	17.2779	-36.8327	1.3335	38	no
LBT-2mm/s	13_30	486	4.6	17.3	1.69101e+17	6.17707	1.47124e+13	0.362311	406235	0.132236	486.937	16.918	-36.8396	1.35259	36	no
LBT-2mm/s	13_31	487	4.9	16.1	1.49929e+17	6.14029	1.4242e+13	0.368502	396210	0.157697	487.017	16.9098	-36.847	1.37282	35	no
LBT-2mm/s	13_32	487	5.2	14.8	1.37823e+17	6.11465	1.39219e+13	0.372908	389340	0.182834	487.146	16.905	-36.8541	1.39231	34	no
LBT-2mm/s	13_33	487	6.2	21.3	1.98353e+17	6.22715	1.536e+13	0.35429	419929	0.263565	487.322	16.9103	-36.8611	1.41167	32	no
LBT-2mm/s	13_34	487	7.2	27.7	2.57952e+17	6.30951	1.64892e+13	0.341535	443460	0.338748	487.542	16.9176	-36.8683	1.43133	31	no
LBT-2mm/s	13_35	488	7.3	24.9	2.2094e+17	6.26084	1.58138e+13	0.348988	429435	0.345939	487.769	16.9325	-36.8752	1.45031	30	no
LBT-2mm/s	13_36	488	7.3	22.1	1.96096e+17	6.22361	1.53126e+13	0.354859	418932	0.345939	488.016	16.981	-36.8818	1.46859	28	no
LBT-2mm/s	13_37	488	7.1	17.4	1.54392e+17	6.14964	1.43553e+13	0.366981	398637	0.331496	488.255	17.0562	-36.8884	1.48663	27	no
LBT-2mm/s	13_38	488	6.8	12.7	1.12688e+17	6.05358	1.31853e+13	0.383698	373381	0.309381	488.462	17.1227	-36.8945	1.50361	26	no
LBT-2mm/s	13_39	488	7.1	12.1	1.07365e+17	6.03895	1.30141e+13	0.386347	369641	0.331496	488.642	17.2571	-36.9002	1.51918	24	no
LBT-2mm/s	13_40	488	7.3	11.5	1.02041e+17	6.02362	1.28367e+13	0.389153	365751	0.345939	488.786	17.389	-36.9052	1.53302	20	no
LBT-2mm/s	13_41	488	8.1	11.6	1.02928e+17	6.02623	1.28667e+13	0.388674	366410	0.4013	488.859	17.4405	-36.9082	1.54134	17	no
LBT-2mm/s	13_42	488	8.8	11.7	1.03815e+17	6.02882	1.28965e+13	0.388199	367065	0.446582	488.907	17.4904	-36.9105	1.54742	14	no
LBT-2mm/s	13_43	488	10.7	11.9	1.0559e+17	6.03393	1.29557e+13	0.387264	368362	0.555184	488.943	17.5554	-36.9124	1.55265	13	no
LBT-2mm/s	13_44	488	12.5	12.1	1.07365e+17	6.03896	1.30141e+13	0.386347	369641	0.640348	488.963	17.5904	-36.9135	1.55583	13	no
LBT-2mm/s	13_45	488	14.2	12.3	1.09139e+17	6.04391	1.30719e+13	0.385447	370904	0.706958	488.969	17.6066	-36.9144	1.55817	13	no
LBT-2mm/s	13_46	488	15.9	12.5	1.10914e+17	6.04879	1.31289e+13	0.384565	372150	0.76205	488.975	17.6167	-36.915	1.55992	13	no
LBT-2mm/s	13_47	488	17.8	16.3	1.44632e+17	6.1296	1.41044e+13	0.370377	393264	0.81213	488.982	17.6248	-36.9156	1.56153	13	no
LBT-2mm/s	13_48	488	19.6	20.1	1.78349e+17	6.19416	1.49254e+13	0.359611	410762	0.850277	488.988	17.6303	-36.9161	1.56283	13	no
LBT-2mm/s	13_49	488	17.8	16.3	1.44632e+17	6.1296	1.41044e+13	0.370377	393264	0.81213	488.994	17.6355	-36.9165	1.56416	13	no
LBT-2mm/s	13_50	488	15.9	12.5	1.10914e+17	6.04879	1.31289e+13	0.384565	372150	0.76205	488.991	17.6424	-36.917	1.56549	13	no
LBT-2mm/s	13_51	488	14.2	12.3	1.09139e+17	6.04391	1.30719e+13	0.385447	370904	0.706958	488.987	17.651	-36.9175	1.56675	13	no
LBT-2mm/s	13_52	488	12.5	12.1	1.07365e+17	6.03896	1.30141e+13	0.386347	369641	0.640348	488.985	17.6596	-36.9178	1.56773	13	no
LBT-2mm/s	13_53	488	10.7	11.9	1.0559e+17	6.03393	1.29557e+13	0.387264	368362	0.555184	488.971	17.6595	-36.9184	1.56921	13	no
LBT-2mm/s	13_54	488	8.8	11.7	1.03815e+17	6.02882	1.28965e+13	0.388199	367065	0.446582	488.945	17.6397	-36.9187	1.57017	14	no
LBT-2mm/s	13_55	488	8.1	11.6	1.02928e+17	6.02623	1.28667e+13	0.388674	366410	0.4013	488.9	17.6077	-36.9189	1.57066	16	no
LBT-2mm/s	13_56	488	7.3	11.5	1.02041e+17	6.02362	1.28367e+13	0.389153	365751	0.345939	488.827	17.5354	-36.9187	1.57009	17	no
LBT-2mm/s	13_57	488	7.1	12.1	1.07365e+17	6.03895	1.30141e+13	0.386347	369641	0.331496	488.707	17.4223	-36.9176	1.56714	18	no
LBT-2mm/s	13_58	488	6.8	12.7	1.12688e+17	6.05358	1.31853e+13	0.383698	373381	0.309381	488.546	17.3026	-36.9159	1.56231	20	no
LBT-2mm/s	13_59	488	7.1	17.4	1.54392e+17	6.14964	1.43553e+13	0.366981	398637	0.331496	488.348	17.177	-36.9136	1.55596	21	no
LBT-2mm/s	13_60	488	7.3	22.1	1.96096e+17	6.22361	1.53126e+13	0.354859	418932	0.345939	488.139	17.0877	-36.9108	1.54841	22	no
LBT-2mm/s	13_61	488	7.3	24.9	2.2094e+17	6.26084	1.58138e+13	0.348988	429435	0.345939	487.907	17.0172	-36.9077	1.53976	24	no
LBT-2mm/s	13_62	487	7.2	27.7	2.57952e+17	6.30951	1.64892e+13	0.341535	443460	0.338748	487.656	16.9602	-36.904	1.52957	24	no
LBT-2mm/s	13_63	487	6.2	21.3	1.98353e+17	6.22715	1.536e+13	0.35429	419929	0.263565	487.446	16.935	-36.9006	1.52041	23	no
LBT-2mm/s	13_64	487	5.2	14.8	1.37823e+17	6.11465	1.39219e+13	0.372908	389340	0.182834	487.245	16.9277	-36.8969	1.51013	21	no
LBT-2mm/s	13_65	487	4.9	16.1	1.49929e+17	6.14029	1.4242e+13	0.368502	396210	0.157697	487.08	16.9154	-36.893	1.49934	22	no
LBT-2mm/s	13_66	486	4.6	17.3	1.69101e+17	6.17707	1.47124e+13	0.362311	406235	0.132236	486.991	16.9284	-36.8891	1.4886	24	no
LBT-2mm/s	13_67	486	4.1	10.2	9.9701e+16	6.01499	1.27565e+13	0.390441	363967	0.0893621	486.953	16.9493	-36.8857	1.47935	26	no
LBT-2mm/s	13_68	493	4	8.9	6.21392e+16	5.8741	1.12277e+13	0.417821	329829	0.0807714	486.951	16.9899	-36.8851	1.47778	28	no
LBT-2mm/s	13_69	486	3.8	7.6	7.4287e+16	5.9258	1.17823e+13	0.407223	342321	0.063642	486.944	17.0936	-36.8839	1.47439	31	no
LBT-2mm/s	13_70	486	3.8	7	6.84223e+16	5.90149	1.15235e+13	0.412064	336505	0.063642	486.928	17.1918	-36.8823	1.47009	33	no
LBT-2mm/s	13_71	486	3.8	6.4	6.25575e+16	5.8751	1.12481e+13	0.417417	330278	0.063642	486.883	17.2178	-36.88	1.46359	35	no
LBT-2mm/s	13_72	486	4	8.4	8.21067e+16	5.95651	1.2105e+13	0.401421	349545	0.0807714	486.838	17.2016	-36.8783	1.45894	37	no
LBT-2mm/s	13_73	486	4.2	10.3	1.00678e+17	6.01822	1.27902e+13	0.389899	364711	0.097957	486.786	17.2106	-36.8769	1.45497	33	no
LBT-2mm/s	13_74	486	4.5	12.6	1.2316e+17	6.07979	1.35055e+13	0.378891	380334	0.123693	486.751	17.2047	-36.876	1.45257	30	no
LBT-2mm/s	13_75	486	4.7	14.9	1.45642e+17	6.13123	1.41309e+13	0.370013	393826	0.140754	486.728	17.1975	-36.8754	1.45109	28	no
LBT-2mm/s	13_76	486	5.4	17.1	1.67146e+17	6.17397	1.46662e+13	0.362904	405262	0.199379	486.631	17.1586	-36.8735	1.44564	26	no
LBT-2mm/s	13_77	486	6.1	19.3	1.8865e+17	6.21154	1.51534e+13	0.356789	415579	0.255729	486.441	16.9767	-36.8703	1.43682	23	no
LBT-2mm/s	13_78	486	7.4	19	1.85718e+17	6.20671	1.50894e+13	0.357574	414229	0.353071	486.386	16.9516	-36.867	1.42783	21	no
LBT-2mm/s	13_79	486	8.6	18.7	1.82785e+17	6.20177	1.50247e+13	0.358373	412863	0.433943	486.407	16.9454	-36.8646	1.42139	19	no
LBT-2mm/s	13_80	486	17.7	38.8	3.79255e+17	6.43229	1.82976e+13	0.323788	480357	0.809762	486.418	16.9437	-36.8626	1.41566	16	no
LBT-2mm/s	13_81	486	26.8	58.9	5.75724e+17	6.56795	2.04805e+13	0.305781	523748	0.941085	486.429	16.9431	-36.8606	1.41027	14	no
LBT-2mm/s	13_82	486	42.5	97.1	9.49115e+17	6.73418	2.34401e+13	0.285748	580857	0.993032	486.438	16.9421	-36.8591	1.40606	13	no
LBT-2mm/s	14_15	486	36.4	91.1	8.90467e+17	6.71274	2.30399e+13	0.288216	573239	0.98381	486.454	16.9405	-36.7873	1.20868	11	no
LBT-2mm/s	14_16	486	27.8	82.6	8.07383e+17	6.67995	2.24385e+13	0.292055	561734	0.948383	486.437	16.9417	-36.7914	1.21986	12	no
LBT-2mm/s	14_17	486	19.1	74.1	7.24299e+17	6.64377	2.17902e+13	0.296382	549247	0.840489	486.432	16.9422	-36.7954	1.23101	13	no
LBT-2mm/s	14_18	486	16.2	72.9	7.12569e+17	6.63835	2.16943e+13	0.297039	547394	0.77071	486.399	16.9475	-36.7998	1.24291	14	no
LBT-2mm/s	14_19	486	13.2	71.7	7.0084e+17	6.63285	2.15973e+13	0.297709	545516	0.669289	486.413	16.9491	-36.8051	1.25752	25	no
LBT-2mm/s	14_20	486	9.3	51.6	5.0437e+17	6.52464	1.97617e+13	0.311359	509589	0.477152	486.571	17.1679	-36.8111	1.27398	28	no
LBT-2mm/s	14_21	486	5.4	31.4	3.06923e+17	6.36446	1.72815e+13	0.333393	459738	0.199379	486.682	17.2974	-36.8135	1.28069	31	no
LBT-2mm/s	14_22	486	5	22.3	2.17974e+17	6.25633	1.57562e+13	0.349647	428228	0.166115	486.716	17.3238	-36.8145	1.28329	32	no
LBT-2mm/s	14_23	486	4.5	13.1	1.28047e+17	6.09163	1.36481e+13	0.376809	383424	0.123693	486.78	17.3998	-36.8166	1.28923	34	no
LBT-2mm/s	14_24	487	4.2	10	9.31236e+16	5.99479	1.25236e+13	0.39426	358838	0.097957	486.847	17.5342	-36.8195	1.29707	35	no
LBT-2mm/s	14_25	487	3.8	6.8	6.33241e+16	5.87868	1.12851e+13	0.416685	331118	0.063642	486.927	17.6601	-36.8236	1.30854	35	no
LBT-2mm/s	14_26	487	3.9	7.7	7.17052e+16	5.91587	1.16703e+13	0.409297	339815	0.0721943	486.969	17.6685	-36.8265	1.31655	37	no
LBT-2mm/s	14_27	487	3.9	8.5	7.91551e+16	5.94518	1.19859e+13	0.403532	346884	0.0721943	486.996	17.6258	-36.8297	1.32521	37	no
LBT-2mm/s	14_28	493	4	10	6.98193e+16	5.90843	1.15866e+13	0.410868	337939	0.0807714	487.003	17.5648	-36.8316	1.33049	40	no
LBT-2mm/s	14_29	487	4.1	11.5	1.07092e+17	6.03653	1.30052e+13	0.386486	369423	0.0893621	487.004	17.5053	-36.8327	1.33357	40	no
LBT-2mm/s	14_30	487	6.5	63.3	5.89472e+17	6.57569	2.06114e+13	0.304799	526314	0.286734	486.973	16.946	-36.8398	1.35295	39	no
LBT-2mm/s	14_31	487	6.9	55.3	5.14974e+17	6.53142	1.98731e+13	0.310474	511790	0.316812	487.038	16.8991	-36.8471	1.37308	37	no
LBT-2mm/s	14_32	487	7.3	47.3	4.40475e+17	6.48059	1.9052e+13	0.317193	495487	0.345939	487.164	16.9025	-36.8541	1.39249	36	no
LBT-2mm/s	14_33	487	9.4	59.7	5.55948e+17	6.55648	2.02881e+13	0.307243	519970	0.483092	487.336	16.9096	-36.8612	1.41184	34	no
LBT-2mm/s	14_34	487	11.4	72.1	6.71421e+17	6.61864	2.13487e+13	0.299448	540694	0.590231	487.559	16.9188	-36.8683	1.43144	33	no
LBT-2mm/s	14_35	488	12.1	71.1	6.30878e+17	6.59806	2.09927e+13	0.301994	533765	0.622799	487.789	16.9323	-36.8752	1.45041	31	no
LBT-2mm/s	14_36	488	12.8	70.1	6.22004e+17	6.59339	2.09126e+13	0.302577	532202	0.653021	488.035	16.979	-36.8819	1.46873	30	no
LBT-2mm/s	14_37	488	12.6	60.3	5.35048e+17	6.54393	2.00793e+13	0.308855	515860	0.644618	488.275	17.0617	-36.8884	1.48677	28	no
LBT-2mm/s	14_38	488	12.3	50.4	4.47204e+17	6.48551	1.91302e+13	0.316533	497046	0.631668	488.483	17.127	-36.8946	1.50381	27	no
LBT-2mm/s	14_39	488	13.1	52.3	4.64063e+17	6.49752	1.93223e+13	0.314931	500872	0.665288	488.666	17.2636	-36.9003	1.51948	25	no
LBT-2mm/s	14_40	488	13.9	54.1	4.80035e+17	6.50852	1.94996e+13	0.313474	504395	0.696093	488.809	17.3837	-36.9054	1.53349	21	no
LBT-2mm/s	14_41	488	14.8	54.2	4.80922e+17	6.50913	1.95094e+13	0.313394	504588	0.727624	488.883	17.4392	-36.9084	1.54187	18	no
LBT-2mm/s	14_42	488	15.6	54.2	4.80922e+17	6.50913	1.95094e+13	0.313394	504588	0.753085	488.931	17.4896	-36.9107	1.548	14	no
LBT-2mm/s	14_43	488	16.9	53.2	4.72049e+17	6.50307	1.94115e+13	0.314195	502645	0.789786	488.967	17.5495	-36.9126	1.55332	13	no
LBT-2mm/s	14_44	488	18.2	52.1	4.62289e+17	6.49628	1.93023e+13	0.315096	500474	0.821326	488.985	17.5806	-36.9138	1.55657	13	no
LBT-2mm/s	14_45	489	20.5	55.9	4.7267e+17	6.5035	1.94184e+13	0.314138	502782	0.866476	488.992	17.596	-36.9146	1.55893	13	no
LBT-2mm/s	14_46	489	22.7	59.7	5.04801e+17	6.52492	1.97663e+13	0.311322	509679	0.899344	488.999	17.6057	-36.9153	1.56068	13	no
LBT-2mm/s	14_47	489	24.7	69.4	5.86821e+17	6.57422	2.05864e+13	0.304987	525823	0.922381	489.005	17.6138	-36.9159	1.56228	13	no
LBT-2mm/s	14_48	489	26.6	79.1	6.68841e+17	6.61736	2.13265e+13	0.299604	540263	0.93951	489.011	17.62	-36.9163	1.56357	13	no
LBT-2mm/s	14_49	489	24.7	69.4	5.86821e+17	6.57422	2.05864e+13	0.304987	525823	0.922381	489.015	17.6264	-36.9168	1.56491	13	no
LBT-2mm/s	14_50	489	22.7	59.7	5.04801e+17	6.52492	1.97663e+13	0.311322	509679	0.899344	489.014	17.6344	-36.9173	1.56625	13	no
LBT-2mm/s	14_51	489	20.5	55.9	4.7267e+17	6.5035	1.94184e+13	0.314138	502782	0.866476	489.01	17.6435	-36.9178	1.56753	13	no
LBT-2mm/s	14_52	488	18.2	52.1	4.62289e+17	6.49628	1.93023e+13	0.315096	500474	0.821326	489.006	17.6508	-36.9181	1.56854	13	no
LBT-2mm/s	14_53	488	16.9	53.2	4.72049e+17	6.50307	1.94115e+13	0.314195	502645	0.789786	488.992	17.648	-36.9187	1.57004	13	no
LBT-2mm/s	14_54	488	15.6	54.2	4.80922e+17	6.50913	1.95094e+13	0.313394	504588	0.753085	488.966	17.6313	-36.919	1.57098	15	no
LBT-2mm/s	14_55	488	14.8	54.2	4.80922e+17	6.50913	1.95094e+13	0.313394	504588	0.727624	488.922	17.6066	-36.9191	1.57133	16	no
LBT-2mm/s	14_56	488	13.9	54.1	4.80035e+17	6.50852	1.94996e+13	0.313474	504395	0.696093	488.85	17.5303	-36.9189	1.5707	18	no
LBT-2mm/s	14_57	488	13.1	52.3	4.64063e+17	6.49752	1.93223e+13	0.314931	500872	0.665288	488.727	17.4203	-36.9178	1.56763	19	no
LBT-2mm/s	14_58	488	12.3	50.4	4.47204e+17	6.48551	1.91302e+13	0.316533	497046	0.631668	488.568	17.3031	-36.916	1.56266	21	no
LBT-2mm/s	14_59	488	12.6	60.3	5.35048e+17	6.54393	2.00793e+13	0.308855	515860	0.644618	488.369	17.1781	-36.9136	1.55615	22	no
LBT-2mm/s	14_60	488	12.8	70.1	6.22004e+17	6.59339	2.09126e+13	0.302577	532202	0.653021	488.16	17.0895	-36.9109	1.54856	24	no
LBT-2mm/s	14_61	488	12.1	71.1	6.30878e+17	6.59806	2.09927e+13	0.301994	533765	0.622799	487.925	17.0177	-36.9077	1.53987	25	no
LBT-2mm/s	14_62	487	11.4	72.1	6.71421e+17	6.61864	2.13487e+13	0.299448	540694	0.590231	487.672	16.9613	-36.904	1.52966	25	no
LBT-2mm/s	14_63	487	9.4	59.7	5.55948e+17	6.55648	2.02881e+13	0.307243	519970	0.483092	487.462	16.9333	-36.9007	1.5205	24	no
LBT-2mm/s	14_64	487	7.3	47.3	4.40475e+17	6.48059	1.9052e+13	0.317193	495487	0.345939	487.26	16.9272	-36.8969	1.51023	22	no
LBT-2mm/s	14_65	487	6.9	55.3	5.14974e+17	6.53142	1.98731e+13	0.310474	511790	0.316812	487.1	16.9111	-36.893	1.49944	23	no
LBT-2mm/s	14_66	487	6.5	63.3	5.89472e+17	6.57569	2.06114e+13	0.304799	526314	0.286734	487.021	16.9207	-36.8891	1.48875	25	no
LBT-2mm/s	14_67	487	4.1	11.5	1.07092e+17	6.03653	1.30052e+13	0.386486	369423	0.0893621	487.002	16.9837	-36.8858	1.47955	28	no
LBT-2mm/s	14_68	493	4	10	6.98193e+16	5.90843	1.15866e+13	0.410868	337939	0.0807714	487.007	17.0501	-36.8852	1.47794	30	no
LBT-2mm/s	14_69	487	3.9	8.5	7.91551e+16	5.94518	1.19859e+13	0.403532	346884	0.0721943	487.014	17.1901	-36.8839	1.47426	32	no
LBT-2mm/s	14_70	487	3.9	7.7	7.17052e+16	5.91587	1.16703e+13	0.409297	339815	0.0721943	487.011	17.3075	-36.8821	1.4695	34	no
LBT-2mm/s	14_71	487	3.8	6.8	6.33241e+16	5.87868	1.12851e+13	0.416685	331118	0.063642	486.97	17.3562	-36.8798	1.46301	37	no
LBT-2mm/s	14_72	487	4.2	10	9.31236e+16	5.99479	1.25236e+13	0.39426	358838	0.097957	486.927	17.3337	-36.8781	1.4583	39	no
LBT-2mm/s	14_73	486	4.5	13.1	1.28047e+17	6.09163	1.36481e+13	0.376809	383424	0.123693	486.875	17.3141	-36.8766	1.45435	35	no
LBT-2mm/s	14_74	486	5	22.3	2.17974e+17	6.25633	1.57562e+13	0.349647	428228	0.166115	486.84	17.2942	-36.8758	1.45196	33	no
LBT-2mm/s	14_75	486	5.4	31.4	3.06923e+17	6.36446	1.72815e+13	0.333393	459738	0.199379	486.817	17.2802	-36.8752	1.45046	30	no
LBT-2mm/s	14_76	486	9.3	51.6	5.0437e+17	6.52464	1.97617e+13	0.311359	509589	0.477152	486.707	17.2471	-36.8732	1.44493	28	no
LBT-2mm/s	14_77	486	13.2	71.7	7.0084e+17	6.63285	2.15973e+13	0.297709	545516	0.669289	486.466	16.9879	-36.8702	1.43678	25	no
LBT-2mm/s	14_78	486	16.2	72.9	7.12569e+17	6.63835	2.16943e+13	0.297039	547394	0.77071	486.398	16.951	-36.867	1.42779	23	no
LBT-2mm/s	14_79	486	19.1	74.1	7.24299e+17	6.64377	2.17902e+13	0.296382	549247	0.840489	486.416	16.9445	-36.8646	1.42136	20	no
LBT-2mm/s	14_80	486	27.8	82.6	8.07383e+17	6.67995	2.24385e+13	0.292055	561734	0.948383	486.424	16.9431	-36.8625	1.41561	18	no
LBT-2mm/s	14_81	486	36.4	91.1	8.90467e+17	6.71274	2.30399e+13	0.288216	573239	0.98381	486.43	16.9428	-36.8606	1.4102	15	no
LBT-2mm/s	15_15	486	40.1	104.5	1.02145e+18	6.75896	2.39095e+13	0.282937	589753	0.990274	486.456	16.9402	-36.7873	1.20871	11	no
LBT-2mm/s	15_16	486	34.8	116.9	1.14265e+18	6.79696	2.46445e+13	0.278708	603598	0.979857	486.439	16.9412	-36.7914	1.21981	12	no
LBT-2mm/s	15_17	486	29.4	129.2	1.26288e+18	6.83104	2.53192e+13	0.274997	616223	0.958277	486.433	16.9414	-36.7954	1.23094	13	no
LBT-2mm/s	15_18	486	24.5	124.3	1.21498e+18	6.81785	2.50563e+13	0.276424	611313	0.920328	486.404	16.9456	-36.7998	1.24285	14	no
LBT-2mm/s	15_19	486	19.6	119.4	1.16709e+18	6.80415	2.47857e+13	0.277918	606246	0.850277	486.418	16.9467	-36.8051	1.25744	14	no
LBT-2mm/s	15_20	486	13.5	107.6	1.05175e+18	6.76884	2.4099e+13	0.281827	593332	0.68103	486.592	17.2699	-36.8109	1.27342	22	no
LBT-2mm/s	15_21	486	7.3	95.8	9.36408e+17	6.72964	2.33549e+13	0.286267	579239	0.345939	486.733	17.4678	-36.8131	1.27965	27	no
LBT-2mm/s	15_22	487	6	55.3	5.14974e+17	6.53139	1.98731e+13	0.310474	511789	0.247838	486.776	17.4775	-36.8141	1.28236	34	no
LBT-2mm/s	15_23	487	4.7	14.7	1.36892e+17	6.11226	1.38965e+13	0.373265	388788	0.140754	486.851	17.5487	-36.8163	1.28851	33	no
LBT-2mm/s	15_24	487	4.3	10.9	1.01505e+17	6.02093	1.28184e+13	0.389445	365335	0.106548	486.92	17.7035	-36.8192	1.2964	30	no
LBT-2mm/s	15_25	487	3.8	7.1	6.61178e+16	5.89139	1.14174e+13	0.414101	334111	0.063642	486.999	17.855	-36.8233	1.30768	29	no
LBT-2mm/s	15_26	487	3.9	8.4	7.82238e+16	5.94166	1.19477e+13	0.404217	346031	0.0721943	487.04	17.8615	-36.8262	1.31553	35	no
LBT-2mm/s	15_27	487	3.9	9.7	9.03299e+16	5.98456	1.2421e+13	0.395978	356555	0.0721943	487.065	17.819	-36.8294	1.3244	40	no
LBT-2mm/s	15_28	493	4.1	12.2	8.51796e+16	5.96783	1.22257e+13	0.399315	352235	0.0893621	487.068	17.7753	-36.8315	1.33006	40	no
LBT-2mm/s	15_29	487	4.2	14.6	1.3596e+17	6.10931	1.38709e+13	0.373626	388224	0.097957	487.065	17.7311	-36.8327	1.33347	36	no
LBT-2mm/s	15_30	487	8.1	103.4	9.62898e+17	6.73904	2.35315e+13	0.285193	582593	0.4013	486.992	16.9946	-36.8399	1.35337	29	no
LBT-2mm/s	15_31	487	9	95.8	8.92124e+17	6.71336	2.30514e+13	0.288144	573460	0.458986	487.045	16.8934	-36.8472	1.37337	24	no
LBT-2mm/s	15_32	487	9.8	88.1	8.20419e+17	6.6853	2.25358e+13	0.291423	563600	0.506277	487.17	16.9014	-36.8542	1.39268	20	no
LBT-2mm/s	15_33	487	12.2	96.5	8.98643e+17	6.71581	2.30968e+13	0.287861	574325	0.627257	487.341	16.9097	-36.8612	1.41196	14	no
LBT-2mm/s	15_34	487	14.5	104.9	9.76867e+17	6.74389	2.36232e+13	0.284641	584332	0.717466	487.567	16.9198	-36.8683	1.43151	12	no
LBT-2mm/s	15_35	488	15.4	102.1	9.05944e+17	6.71853	2.31473e+13	0.287547	575287	0.746936	487.801	16.9322	-36.8752	1.45045	12	no
LBT-2mm/s	15_36	488	16.2	99.2	8.80212e+17	6.70885	2.29679e+13	0.288667	571866	0.77071	488.045	16.977	-36.8819	1.46883	12	no
LBT-2mm/s	15_37	488	17.3	96.2	8.53592e+17	6.69856	2.27783e+13	0.289866	568243	0.800008	488.285	17.0656	-36.8884	1.48687	12	no
LBT-2mm/s	15_38	488	18.4	93.1	8.26086e+17	6.6876	2.25777e+13	0.291152	564403	0.825764	488.493	17.1307	-36.8947	1.50396	12	no
LBT-2mm/s	15_39	488	19.7	96.3	8.5448e+17	6.69891	2.27847e+13	0.289826	568365	0.852165	488.678	17.2697	-36.9004	1.51974	12	no
LBT-2mm/s	15_40	488	20.9	99.5	8.82874e+17	6.70987	2.29866e+13	0.288549	572224	0.873128	488.821	17.3774	-36.9055	1.53385	13	no
LBT-2mm/s	15_41	488	22	99.9	8.86423e+17	6.71121	2.30116e+13	0.288393	572699	0.889832	488.897	17.4362	-36.9086	1.54228	13	no
LBT-2mm/s	15_42	488	23.1	100.3	8.89972e+17	6.71255	2.30364e+13	0.288238	573173	0.904421	488.944	17.4877	-36.9108	1.54845	13	no
LBT-2mm/s	15_43	489	23.9	97.8	8.26961e+17	6.68795	2.25842e+13	0.29111	564527	0.913849	488.979	17.5433	-36.9128	1.55381	13	no
LBT-2mm/s	15_44	489	24.6	95.2	8.04977e+17	6.67895	2.24205e+13	0.292173	561387	0.921361	488.996	17.5713	-36.914	1.55712	13	no
LBT-2mm/s	15_45	489	26.4	99.7	8.43027e+17	6.69439	2.27018e+13	0.290354	566780	0.937895	489.005	17.5863	-36.9148	1.55949	13	no
LBT-2mm/s	15_46	489	28.2	104.1	8.80232e+17	6.70886	2.29681e+13	0.288666	571869	0.951051	489.012	17.5963	-36.9155	1.56124	13	no
LBT-2mm/s	15_47	489	29.8	111.3	9.41112e+17	6.73133	2.33865e+13	0.286074	579840	0.960447	489.018	17.605	-36.9161	1.56282	13	no
LBT-2mm/s	15_48	489	31.3	118.4	1.00115e+18	6.75218	2.37803e+13	0.283702	587308	0.967653	489.023	17.6118	-36.9165	1.56411	13	no
LBT-2mm/s	15_49	489	29.8	111.3	9.41112e+17	6.73133	2.33865e+13	0.286074	579840	0.960447	489.027	17.619	-36.917	1.56545	13	no
LBT-2mm/s	15_50	489	28.2	104.1	8.80232e+17	6.70886	2.29681e+13	0.288666	571869	0.951051	489.025	17.627	-36.9175	1.5668	13	no
LBT-2mm/s	15_51	489	26.4	99.7	8.43027e+17	6.69439	2.27018e+13	0.290354	566780	0.937895	489.021	17.6354	-36.918	1.56812	13	no
LBT-2mm/s	15_52	489	24.6	95.2	8.04977e+17	6.67895	2.24205e+13	0.292173	561387	0.921361	489.017	17.6407	-36.9184	1.56917	13	no
LBT-2mm/s	15_53	489	23.9	97.8	8.26961e+17	6.68795	2.25842e+13	0.29111	564527	0.913849	489.002	17.6355	-36.9189	1.57071	13	no
LBT-2mm/s	15_54	488	23.1	100.3	8.89972e+17	6.71255	2.30364e+13	0.288238	573173	0.904421	488.977	17.6225	-36.9193	1.57164	13	no
LBT-2mm/s	15_55	488	22	99.9	8.86423e+17	6.71121	2.30116e+13	0.288393	572699	0.889832	488.934	17.6051	-36.9193	1.57186	13	no
LBT-2mm/s	15_56	488	20.9	99.5	8.82874e+17	6.70987	2.29866e+13	0.288549	572224	0.873128	488.863	17.5253	-36.9191	1.57117	13	no
LBT-2mm/s	15_57	488	19.7	96.3	8.5448e+17	6.69891	2.27847e+13	0.289826	568365	0.852165	488.739	17.4181	-36.9179	1.56801	13	no
LBT-2mm/s	15_58	488	18.4	93.1	8.26086e+17	6.6876	2.25777e+13	0.291152	564403	0.825764	488.58	17.3029	-36.9161	1.56294	13	no
LBT-2mm/s	15_59	488	17.3	96.2	8.53592e+17	6.69856	2.27783e+13	0.289866	568243	0.800008	488.381	17.1794	-36.9137	1.55628	13	no
LBT-2mm/s	15_60	488	16.2	99.2	8.80212e+17	6.70885	2.29679e+13	0.288667	571866	0.77071	488.169	17.0899	-36.9109	1.54868	13	no
LBT-2mm/s	15_61	488	15.4	102.1	9.05944e+17	6.71853	2.31473e+13	0.287547	575287	0.746936	487.934	17.0174	-36.9077	1.53996	15	no
LBT-2mm/s	15_62	487	14.5	104.9	9.76867e+17	6.74389	2.36232e+13	0.284641	584332	0.717466	487.68	16.962	-36.904	1.52972	19	no
LBT-2mm/s	15_63	487	12.2	96.5	8.98643e+17	6.71581	2.30968e+13	0.287861	574325	0.627257	487.469	16.9319	-36.9007	1.52056	23	no
LBT-2mm/s	15_64	487	9.8	88.1	8.20419e+17	6.6853	2.25358e+13	0.291423	563600	0.506277	487.266	16.9276	-36.897	1.5103	25	no
LBT-2mm/s	15_65	487	9	95.8	8.92124e+17	6.71336	2.30514e+13	0.288144	573460	0.458986	487.109	16.9088	-36.8931	1.49955	27	no
LBT-2mm/s	15_66	487	8.1	103.4	9.62898e+17	6.73904	2.35315e+13	0.285193	582593	0.4013	487.033	16.9137	-36.8892	1.48894	29	no
LBT-2mm/s	15_67	487	4.2	14.6	1.3596e+17	6.10931	1.38709e+13	0.373626	388224	0.097957	487.032	17.0459	-36.8859	1.47995	31	no
LBT-2mm/s	15_68	493	4.1	12.2	8.51796e+16	5.96783	1.22257e+13	0.399315	352235	0.0893621	487.044	17.1391	-36.8853	1.47829	33	no
LBT-2mm/s	15_69	487	3.9	9.7	9.03299e+16	5.98456	1.2421e+13	0.395978	356555	0.0721943	487.066	17.3029	-36.8838	1.47411	36	no
LBT-2mm/s	15_70	487	3.9	8.4	7.82238e+16	5.94166	1.19477e+13	0.404217	346031	0.0721943	487.076	17.4218	-36.8819	1.46876	38	no
LBT-2mm/s	15_71	487	3.8	7.1	6.61178e+16	5.89139	1.14174e+13	0.414101	334111	0.063642	487.04	17.4718	-36.8795	1.46226	37	no
LBT-2mm/s	15_72	487	4.3	10.9	1.01505e+17	6.02093	1.28184e+13	0.389445	365335	0.106548	486.997	17.4419	-36.8778	1.45755	35	no
LBT-2mm/s	15_73	487	4.7	14.7	1.36892e+17	6.11226	1.38965e+13	0.373265	388788	0.140754	486.946	17.4031	-36.8764	1.45363	35	no
LBT-2mm/s	15_74	487	6	55.3	5.14974e+17	6.53139	1.98731e+13	0.310474	511789	0.247838	486.911	17.3734	-36.8755	1.45127	35	no
LBT-2mm/s	15_75	486	7.3	95.8	9.36408e+17	6.72964	2.33549e+13	0.286267	579239	0.345939	486.888	17.355	-36.875	1.4498	35	no
LBT-2mm/s	15_76	486	13.5	107.6	1.05175e+18	6.76884	2.4099e+13	0.281827	593332	0.68103	486.765	17.3481	-36.8729	1.44421	28	no
LBT-2mm/s	15_77	486	19.6	119.4	1.16709e+18	6.80415	2.47857e+13	0.277918	606246	0.850277	486.474	17.0032	-36.8702	1.43673	20	no
LBT-2mm/s	15_78	486	24.5	124.3	1.21498e+18	6.81785	2.50563e+13	0.276424	611313	0.920328	486.403	16.9494	-36.867	1.42777	20	no
LBT-2mm/s	15_79	486	29.4	129.2	1.26288e+18	6.83104	2.53192e+13	0.274997	616223	0.958277	486.419	16.9439	-36.8646	1.42133	16	no
LBT-2mm/s	15_80	486	34.8	116.9	1.14265e+18	6.79696	2.46445e+13	0.278708	603598	0.979857	486.428	16.9426	-36.8625	1.41557	13	no
LBT-2mm/s	15_81	486	40.1	104.5	1.02145e+18	6.75896	2.39095e+13	0.282937	589753	0.990274	486.435	16.9424	-36.8606	1.41019	12	no
LBT-2mm/s	16_16	486	38.6	134.8	1.31762e+18	6.84555	2.5611e+13	0.273441	621656	0.988033	486.444	16.9408	-36.7914	1.21979	12	no
LBT-2mm/s	16_17	486	38.6	177.3	1.73304e+18	6.94	2.75779e+13	0.263637	657920	0.988033	486.435	16.941	-36.7954	1.2309	13	no
LBT-2mm/s	16_18	486	31.9	168.6	1.648e+18	6.92256	2.72058e+13	0.265406	651108	0.970163	486.41	16.9445	-36.7997	1.24282	14	no
LBT-2mm/s	16_19	486	25.1	159.8	1.56198e+18	6.90403	2.68149e+13	0.267305	643927	0.926336	486.426	16.9487	-36.805	1.25737	14	no
LBT-2mm/s	16_20	486	17	231.2	2.25989e+18	7.03272	2.96269e+13	0.254534	695055	0.792386	486.608	17.3824	-36.8106	1.27283	22	no
LBT-2mm/s	16_21	486	8.9	146.1	1.42807e+18	6.87316	2.61737e+13	0.270517	632096	0.452813	486.777	17.6677	-36.8127	1.27845	27	no
LBT-2mm/s	16_22	487	6.8	80.1	7.4592e+17	6.65354	2.19639e+13	0.295203	552602	0.309381	486.831	17.6516	-36.8137	1.28132	34	no
LBT-2mm/s	16_23	487	4.6	14.1	1.31304e+17	6.09943	1.3741e+13	0.375471	385433	0.132236	486.915	17.7041	-36.8161	1.28775	33	no
LBT-2mm/s	16_24	487	4.2	10.7	9.96423e+16	6.01511	1.27545e+13	0.390474	363926	0.097957	486.984	17.8569	-36.819	1.29571	30	no
LBT-2mm/s	16_25	487	3.8	7.3	6.79802e+16	5.89957	1.15034e+13	0.412449	336051	0.063642	487.062	18.0212	-36.823	1.30674	29	no
LBT-2mm/s	16_26	487	4	9.3	8.6605e+16	5.97242	1.22806e+13	0.398369	353449	0.0807714	487.102	18.0256	-36.8257	1.31434	35	no
LBT-2mm/s	16_27	487	4.1	11.2	1.04298e+17	6.02856	1.29127e+13	0.387943	367397	0.0893621	487.125	17.9879	-36.829	1.32333	40	no
LBT-2mm/s	16_28	493	4.4	21.2	1.48017e+17	6.13577	1.41928e+13	0.36917	395146	0.115129	487.125	17.9678	-36.8312	1.32933	40	no
LBT-2mm/s	16_29	487	4.7	31.1	2.89614e+17	6.34562	1.70127e+13	0.336086	454231	0.140754	487.119	17.9469	-36.8325	1.33306	36	no
LBT-2mm/s	16_30	487	9.9	164.1	1.52816e+18	6.89648	2.66568e+13	0.268086	641017	0.511932	487.007	17.0572	-36.84	1.35357	29	no
LBT-2mm/s	16_31	487	11.1	144.9	1.34936e+18	6.8537	2.57761e+13	0.272573	624726	0.575522	487.051	16.8927	-36.8472	1.37345	24	no
LBT-2mm/s	16_32	487	12.2	125.7	1.17056e+18	6.80517	2.48056e+13	0.277807	606619	0.627257	487.176	16.9006	-36.8542	1.39273	20	no
LBT-2mm/s	16_33	487	14.6	128.1	1.19291e+18	6.8116	2.49326e+13	0.277104	608998	0.72089	487.346	16.9095	-36.8612	1.41198	14	no
LBT-2mm/s	16_34	487	16.9	130.4	1.21433e+18	6.81767	2.50527e+13	0.276444	611245	0.789786	487.573	16.9205	-36.8683	1.43152	12	no
LBT-2mm/s	16_35	488	18.2	129.3	1.14729e+18	6.79834	2.46715e+13	0.278556	604104	0.821326	487.812	16.9319	-36.8752	1.45044	12	no
LBT-2mm/s	16_36	488	19.5	128.1	1.13664e+18	6.79517	2.46094e+13	0.278905	602940	0.848366	488.052	16.9753	-36.8819	1.46887	12	no
LBT-2mm/s	16_37	488	21.6	129.3	1.14729e+18	6.79834	2.46715e+13	0.278556	604104	0.884016	488.291	17.0688	-36.8885	1.48694	12	no
LBT-2mm/s	16_38	488	23.7	130.5	1.15794e+18	6.80148	2.47331e+13	0.278211	605260	0.91158	488.501	17.1337	-36.8947	1.50408	12	no
LBT-2mm/s	16_39	488	24.6	129.4	1.14818e+18	6.7986	2.46766e+13	0.278527	604201	0.921361	488.687	17.2745	-36.9005	1.51995	12	no
LBT-2mm/s	16_40	488	25.5	128.2	1.13753e+18	6.79543	2.46146e+13	0.278875	603037	0.930097	488.829	17.3716	-36.9056	1.53415	13	no
LBT-2mm/s	16_41	488	27	130.2	1.15528e+18	6.80069	2.47177e+13	0.278297	604972	0.94262	488.906	17.4327	-36.9087	1.54262	13	no
LBT-2mm/s	16_42	488	28.4	132.1	1.17214e+18	6.80562	2.48146e+13	0.277757	606788	0.952334	488.954	17.4851	-36.911	1.5488	13	no
LBT-2mm/s	16_43	489	29	130.9	1.10684e+18	6.78615	2.44335e+13	0.279901	599634	0.955991	488.988	17.5374	-36.9129	1.5542	13	no
LBT-2mm/s	16_44	489	29.6	129.7	1.0967e+18	6.78302	2.43728e+13	0.280247	598492	0.959376	489.005	17.563	-36.9141	1.55754	13	no
LBT-2mm/s	16_45	489	31.4	137	1.15842e+18	6.80162	2.47359e+13	0.278196	605312	0.968085	489.014	17.5776	-36.915	1.55994	13	no
LBT-2mm/s	16_46	489	33.1	144.3	1.22015e+18	6.8193	2.5085e+13	0.276267	611849	0.974627	489.021	17.588	-36.9156	1.56167	13	no
LBT-2mm/s	16_47	489	34.5	151	1.2768e+18	6.83479	2.53943e+13	0.274594	617622	0.979017	489.027	17.5973	-36.9162	1.56324	13	no
LBT-2mm/s	16_48	489	35.9	157.6	1.33261e+18	6.84942	2.56893e+13	0.273028	623113	0.982664	489.032	17.6046	-36.9167	1.56453	13	no
LBT-2mm/s	16_49	489	34.5	151	1.2768e+18	6.83479	2.53943e+13	0.274594	617622	0.979017	489.034	17.6122	-36.9172	1.56587	13	no
LBT-2mm/s	16_50	489	33.1	144.3	1.22015e+18	6.8193	2.5085e+13	0.276267	611849	0.974627	489.033	17.62	-36.9177	1.56724	13	no
LBT-2mm/s	16_51	489	31.4	137	1.15842e+18	6.80162	2.47359e+13	0.278196	605312	0.968085	489.028	17.6274	-36.9182	1.56859	13	no
LBT-2mm/s	16_52	489	29.6	129.7	1.0967e+18	6.78302	2.43728e+13	0.280247	598492	0.959376	489.023	17.631	-36.9185	1.56967	13	no
LBT-2mm/s	16_53	489	29	130.9	1.10684e+18	6.78615	2.44335e+13	0.279901	599634	0.955991	489.009	17.6239	-36.9191	1.57125	13	no
LBT-2mm/s	16_54	488	28.4	132.1	1.17214e+18	6.80562	2.48146e+13	0.277757	606788	0.952334	488.984	17.6139	-36.9195	1.57217	13	no
LBT-2mm/s	16_55	488	27	130.2	1.15528e+18	6.80069	2.47177e+13	0.278297	604972	0.94262	488.942	17.6031	-36.9195	1.5723	13	no
LBT-2mm/s	16_56	488	25.5	128.2	1.13753e+18	6.79543	2.46146e+13	0.278875	603037	0.930097	488.871	17.5205	-36.9192	1.57156	13	no
LBT-2mm/s	16_57	488	24.6	129.4	1.14818e+18	6.7986	2.46766e+13	0.278527	604201	0.921361	488.746	17.4157	-36.918	1.5683	13	no
LBT-2mm/s	16_58	488	23.7	130.5	1.15794e+18	6.80148	2.47331e+13	0.278211	605260	0.91158	488.589	17.3025	-36.9162	1.56316	13	no
LBT-2mm/s	16_59	488	21.6	129.3	1.14729e+18	6.79834	2.46715e+13	0.278556	604104	0.884016	488.39	17.1805	-36.9137	1.55637	13	no
LBT-2mm/s	16_60	488	19.5	128.1	1.13664e+18	6.79517	2.46094e+13	0.278905	602940	0.848366	488.176	17.0898	-36.9109	1.54876	13	no
LBT-2mm/s	16_61	488	18.2	129.3	1.14729e+18	6.79834	2.46715e+13	0.278556	604104	0.821326	487.94	17.0169	-36.9078	1.54001	15	no
LBT-2mm/s	16_62	487	16.9	130.4	1.21433e+18	6.81767	2.50527e+13	0.276444	611245	0.789786	487.685	16.9625	-36.904	1.52975	19	no
LBT-2mm/s	16_63	487	14.6	128.1	1.19291e+18	6.8116	2.49326e+13	0.277104	608998	0.72089	487.475	16.9307	-36.9007	1.52058	23	no
LBT-2mm/s	16_64	487	12.2	125.7	1.17056e+18	6.80517	2.48056e+13	0.277807	606619	0.627257	487.27	16.9279	-36.897	1.51031	25	no
LBT-2mm/s	16_65	487	11.1	144.9	1.34936e+18	6.8537	2.57761e+13	0.272573	624726	0.575522	487.116	16.9073	-36.8931	1.49958	27	no
LBT-2mm/s	16_66	487	9.9	164.1	1.52816e+18	6.89648	2.66568e+13	0.268086	641017	0.511932	487.04	16.9112	-36.8892	1.48902	29	no
LBT-2mm/s	16_67	487	4.7	31.1	2.89614e+17	6.34562	1.70127e+13	0.336086	454231	0.140754	487.057	17.1215	-36.886	1.48022	31	no
LBT-2mm/s	16_68	493	4.4	21.2	1.48017e+17	6.13577	1.41928e+13	0.36917	395146	0.115129	487.076	17.2421	-36.8854	1.47853	33	no
LBT-2mm/s	16_69	487	4.1	11.2	1.04298e+17	6.02856	1.29127e+13	0.387943	367397	0.0893621	487.112	17.4275	-36.8837	1.47384	36	no
LBT-2mm/s	16_70	487	4	9.3	8.6605e+16	5.97242	1.22806e+13	0.398369	353449	0.0807714	487.133	17.5341	-36.8815	1.46789	38	no
LBT-2mm/s	16_71	487	3.8	7.3	6.79802e+16	5.89957	1.15034e+13	0.412449	336051	0.063642	487.101	17.5689	-36.8792	1.4613	37	no
LBT-2mm/s	16_72	487	4.2	10.7	9.96423e+16	6.01511	1.27545e+13	0.390474	363926	0.097957	487.059	17.5325	-36.8775	1.45671	35	no
LBT-2mm/s	16_73	487	4.6	14.1	1.31304e+17	6.09943	1.3741e+13	0.375471	385433	0.132236	487.009	17.4805	-36.8761	1.45286	35	no
LBT-2mm/s	16_74	487	6.8	80.1	7.4592e+17	6.65354	2.19639e+13	0.295203	552602	0.309381	486.974	17.4444	-36.8753	1.45056	35	no
LBT-2mm/s	16_75	486	8.9	146.1	1.42807e+18	6.87316	2.61737e+13	0.270517	632096	0.452813	486.951	17.4241	-36.8747	1.44914	35	no
LBT-2mm/s	16_76	486	17	216.7	2.11816e+18	7.00998	2.91133e+13	0.256721	685805	0.792386	486.816	17.4559	-36.8727	1.44349	28	no
LBT-2mm/s	16_77	486	25.1	159.8	1.56198e+18	6.90403	2.68149e+13	0.267305	643927	0.926336	486.478	17.0206	-36.8702	1.43666	20	no
LBT-2mm/s	16_78	486	31.9	168.6	1.648e+18	6.92256	2.72058e+13	0.265406	651108	0.970163	486.408	16.948	-36.867	1.42775	20	no
LBT-2mm/s	16_79	486	38.6	177.3	1.73304e+18	6.94	2.75779e+13	0.263637	657920	0.988033	486.424	16.9434	-36.8646	1.42131	14	no
LBT-2mm/s	16_80	486	38.6	134.8	1.31762e+18	6.84555	2.5611e+13	0.273441	621656	0.988033	486.435	16.942	-36.8625	1.41554	12	no
LBT-2mm/s	17_21	487	21.3	116.6	1.08582e+18	6.77964	2.43074e+13	0.280622	597259	0.879464	487.449	18.285	-36.8123	1.27731	23	no
LBT-2mm/s	17_22	487	13.5	65.7	6.11822e+17	6.58795	2.08196e+13	0.303258	530386	0.68103	487.494	18.3444	-36.813	1.27934	24	no
LBT-2mm/s	17_23	487	5.6	14.7	1.36892e+17	6.11268	1.38965e+13	0.373265	388793	0.215736	487.518	18.3575	-36.8145	1.28345	30	no
LBT-2mm/s	17_24	487	4.6	12.8	1.19198e+17	6.07	1.33868e+13	0.380652	377759	0.132236	487.533	18.4172	-36.8162	1.28808	32	no
LBT-2mm/s	17_25	487	4.1	10.9	1.01505e+17	6.02038	1.28184e+13	0.389445	365327	0.0893621	487.584	18.62	-36.8177	1.29234	35	no
LBT-2mm/s	17_26	488	4.2	13.5	1.19787e+17	6.07074	1.34046e+13	0.380386	378135	0.097957	487.622	18.6985	-36.8188	1.29515	36	no
LBT-2mm/s	17_27	488	4.3	16.1	1.42857e+17	6.12469	1.40574e+13	0.371023	392241	0.106548	487.653	18.7018	-36.8206	1.30018	32	no
LBT-2mm/s	17_28	493	4.4	112.2	7.83373e+17	6.66886	2.22564e+13	0.29325	558219	0.115129	487.662	18.7943	-36.8217	1.30334	25	no
LBT-2mm/s	17_29	487	10.1	208.3	1.93976e+18	6.97921	2.84299e+13	0.259726	673437	0.523074	487.663	18.8934	-36.8225	1.30534	23	no
LBT-2mm/s	17_67	487	10.1	208.3	1.93976e+18	6.97921	2.84299e+13	0.259726	673437	0.523074	487.535	17.71	-36.8806	1.46521	23	no
LBT-2mm/s	17_68	493	4.4	112.2	7.83373e+17	6.66886	2.22564e+13	0.29325	558219	0.115129	487.564	17.8811	-36.8796	1.46252	25	no
LBT-2mm/s	17_69	488	4.3	16.1	1.42857e+17	6.12469	1.40574e+13	0.371023	392241	0.106548	487.617	18.0911	-36.8776	1.45714	32	no
LBT-2mm/s	17_70	488	4.2	13.5	1.19787e+17	6.07074	1.34046e+13	0.380386	378135	0.097957	487.646	17.9766	-36.8761	1.45294	36	no
LBT-2mm/s	17_71	487	4.1	10.9	1.01505e+17	6.02038	1.28184e+13	0.389445	365327	0.0893621	487.615	17.8867	-36.8749	1.44956	35	no
LBT-2mm/s	17_72	487	4.6	12.8	1.19198e+17	6.07	1.33868e+13	0.380652	377759	0.132236	487.575	17.8382	-36.8743	1.44791	32	no
LBT-2mm/s	17_73	487	5.6	14.7	1.36892e+17	6.11268	1.38965e+13	0.373265	388793	0.215736	487.54	17.7542	-36.8737	1.4462	30	no
LBT-2mm/s	17_74	487	13.5	65.7	6.11822e+17	6.58795	2.08196e+13	0.303258	530386	0.68103	487.524	17.6835	-36.8732	1.44504	24	no
LBT-2mm/s	17_75	487	21.3	116.6	1.08582e+18	6.77964	2.43074e+13	0.280622	597259	0.879464	487.518	17.644	-36.873	1.44428	23	no
LBT-2mm/s	18_21	488	24.1	115.6	1.02573e+18	6.76037	2.39366e+13	0.282778	590264	0.916063	488.259	17.4684	-36.8132	1.2798	19	no
LBT-2mm/s	18_22	488	14.5	65.9	5.84737e+17	6.57305	2.05666e+13	0.305134	525436	0.717466	488.278	17.4493	-36.8135	1.28063	20	no
LBT-2mm/s	18_23	488	4.8	16.1	1.42857e+17	6.1254	1.40574e+13	0.371023	392251	0.149242	488.285	17.3693	-36.8138	1.28151	31	no
LBT-2mm/s	18_24	488	4.5	14.3	1.26885e+17	6.08886	1.36146e+13	0.377295	382698	0.123693	488.275	17.3691	-36.8138	1.28163	31	no
LBT-2mm/s	18_25	488	4.2	12.5	1.10914e+17	6.04743	1.31289e+13	0.384565	372131	0.097957	488.302	17.537	-36.8138	1.28163	32	no
LBT-2mm/s	18_26	488	4.4	14.7	1.30435e+17	6.0971	1.37164e+13	0.375825	384896	0.115129	488.357	17.5818	-36.8141	1.28241	32	no
LBT-2mm/s	18_27	488	4.5	16.8	1.49068e+17	6.13811	1.42199e+13	0.368801	395730	0.123693	488.398	17.521	-36.8139	1.28187	33	no
LBT-2mm/s	18_28	493	7.4	70.6	4.92925e+17	6.51715	1.96396e+13	0.312338	507172	0.353071	488.415	17.4727	-36.8136	1.2809	21	no
LBT-2mm/s	18_29	488	10.2	124.3	1.10293e+18	6.78494	2.44102e+13	0.280034	599194	0.528562	488.422	17.4513	-36.8134	1.28048	19	no
LBT-2mm/s	18_67	488	10.2	124.3	1.10293e+18	6.78494	2.44102e+13	0.280034	599194	0.528562	488.384	17.011	-36.8735	1.44568	19	no
LBT-2mm/s	18_68	493	7.4	70.6	4.92925e+17	6.51715	1.96396e+13	0.312338	507172	0.353071	488.405	17.0287	-36.8728	1.44372	21	no
LBT-2mm/s	18_69	488	4.5	16.8	1.49068e+17	6.13811	1.42199e+13	0.368801	395730	0.123693	488.428	17.0735	-36.8719	1.4413	31	no
LBT-2mm/s	18_70	488	4.4	14.7	1.30435e+17	6.0971	1.37164e+13	0.375825	384896	0.115129	488.413	17.1359	-36.8719	1.4413	33	no
LBT-2mm/s	18_71	488	4.2	12.5	1.10914e+17	6.04743	1.31289e+13	0.384565	372131	0.097957	488.351	17.1868	-36.872	1.44163	32	no
LBT-2mm/s	18_72	488	4.5	14.3	1.26885e+17	6.08886	1.36146e+13	0.377295	382698	0.123693	488.315	17.1686	-36.872	1.44162	32	no
LBT-2mm/s	18_73	488	4.8	16.1	1.42857e+17	6.1254	1.40574e+13	0.371023	392251	0.149242	488.292	17.1141	-36.872	1.44153	31	no
LBT-2mm/s	18_74	488	14.5	65.9	5.84737e+17	6.57305	2.05666e+13	0.305134	525436	0.717466	488.284	17.0909	-36.8719	1.44145	21	no
LBT-2mm/s	18_75	488	24.1	115.6	1.02573e+18	6.76037	2.39366e+13	0.282778	590264	0.916063	488.283	17.0866	-36.8719	1.44141	19	no
LBT-2mm/s	19_21	489	27.5	108.5	9.17436e+17	6.72276	2.32262e+13	0.287058	576790	0.946291	489.038	17.1407	-36.8137	1.28133	15	no
LBT-2mm/s	19_22	489	16.6	62.3	5.26786e+17	6.53884	1.99951e+13	0.309513	514200	0.7818	489.049	17.1152	-36.8139	1.28176	16	no
LBT-2mm/s	19_23	489	5.6	16.1	1.36136e+17	6.11099	1.38757e+13	0.373557	388346	0.215736	489.049	17.0405	-36.8139	1.2818	28	no
LBT-2mm/s	19_24	489	5	14.7	1.24298e+17	6.08306	1.3539e+13	0.378398	381068	0.166115	489.043	16.9605	-36.8137	1.28125	28	no
LBT-2mm/s	19_25	489	4.3	13.2	1.11614e+17	6.04958	1.31513e+13	0.384221	372622	0.106548	489.085	16.9281	-36.8137	1.28116	28	no
LBT-2mm/s	19_26	489	4.4	14.9	1.25989e+17	6.08653	1.35885e+13	0.377674	382132	0.115129	489.127	16.9123	-36.8137	1.28124	28	no
LBT-2mm/s	19_27	489	4.5	16.5	1.39518e+17	6.11782	1.3968e+13	0.372264	390323	0.123693	489.163	16.8756	-36.8136	1.28089	28	no
LBT-2mm/s	19_28	493	7.6	60.5	4.22407e+17	6.46704	1.88378e+13	0.319022	491206	0.367153	489.18	16.8543	-36.8134	1.28048	16	no
LBT-2mm/s	19_29	489	10.7	104.4	8.82768e+17	6.70983	2.29859e+13	0.288554	572210	0.555184	489.187	16.8449	-36.8134	1.28031	14	no
LBT-2mm/s	19_67	489	10.7	104.4	8.82768e+17	6.70983	2.29859e+13	0.288554	572210	0.555184	489.188	16.768	-36.8724	1.44265	14	no
LBT-2mm/s	19_68	493	7.6	60.5	4.22407e+17	6.46704	1.88378e+13	0.319022	491206	0.367153	489.203	16.7744	-36.872	1.44163	16	no
LBT-2mm/s	19_69	489	4.5	16.5	1.39518e+17	6.11782	1.3968e+13	0.372264	390323	0.123693	489.211	16.7882	-36.8716	1.44047	28	no
LBT-2mm/s	19_70	489	4.4	14.9	1.25989e+17	6.08653	1.35885e+13	0.377674	382132	0.115129	489.18	16.8038	-36.8716	1.44058	28	no
LBT-2mm/s	19_71	489	4.3	13.2	1.11614e+17	6.04958	1.31513e+13	0.384221	372622	0.106548	489.144	16.8439	-36.8717	1.44068	28	no
LBT-2mm/s	19_72	489	5	14.7	1.24298e+17	6.08306	1.3539e+13	0.378398	381068	0.166115	489.107	16.852	-36.8716	1.44059	28	no
LBT-2mm/s	19_73	489	5.6	16.1	1.36136e+17	6.11099	1.38757e+13	0.373557	388346	0.215736	489.068	16.8563	-36.8716	1.44059	28	no
LBT-2mm/s	19_74	489	16.6	62.3	5.26786e+17	6.53884	1.99951e+13	0.309513	514200	0.7818	489.052	16.869	-36.8716	1.44065	16	no
LBT-2mm/s	19_75	489	27.5	108.5	9.17436e+17	6.72276	2.32262e+13	0.287058	576790	0.946291	489.05	16.8822	-36.8717	1.44074	15	no
LBT-2mm/s	20_21	490	27.3	110.6	8.91306e+17	6.71306	2.30457e+13	0.288179	573351	0.944851	489.815	16.8588	-36.8143	1.28285	12	no
LBT-2mm/s	20_22	490	16.4	63.5	5.11736e+17	6.52937	1.98393e+13	0.310742	511122	0.776319	489.827	16.8492	-36.8144	1.28323	12	no
LBT-2mm/s	20_23	490	5.5	16.3	1.31359e+17	6.10007	1.37425e+13	0.375449	385473	0.207582	489.837	16.8263	-36.8145	1.28339	23	no
LBT-2mm/s	20_24	490	4.9	14.9	1.20077e+17	6.0725	1.34133e+13	0.380256	378340	0.157697	489.841	16.8023	-36.8144	1.28312	26	no
LBT-2mm/s	20_25	490	4.3	13.4	1.07988e+17	6.03959	1.30345e+13	0.386029	370071	0.106548	489.863	16.7759	-36.8143	1.283	25	no
LBT-2mm/s	20_26	490	4.5	14.9	1.20077e+17	6.07209	1.34133e+13	0.380256	378334	0.123693	489.89	16.7646	-36.8144	1.28308	25	no
LBT-2mm/s	20_27	490	4.7	16.3	1.31359e+17	6.09966	1.37425e+13	0.375449	385468	0.140754	489.918	16.7533	-36.8143	1.283	24	no
LBT-2mm/s	20_28	493	8.8	63.2	4.41258e+17	6.48117	1.90612e+13	0.317115	495670	0.446582	489.933	16.7435	-36.8143	1.28277	13	no
LBT-2mm/s	20_29	490	12.8	110.1	8.87277e+17	6.71154	2.30175e+13	0.288356	572814	0.653021	489.94	16.7364	-36.8142	1.28265	11	no
LBT-2mm/s	20_67	490	12.8	110.1	8.87277e+17	6.71154	2.30175e+13	0.288356	572814	0.653021	489.935	16.7112	-36.8723	1.44255	11	no
LBT-2mm/s	20_68	493	8.8	63.2	4.41258e+17	6.48117	1.90612e+13	0.317115	495670	0.446582	489.945	16.7166	-36.8721	1.44188	13	no
LBT-2mm/s	20_69	490	4.7	16.3	1.31359e+17	6.09966	1.37425e+13	0.375449	385468	0.140754	489.955	16.7275	-36.8718	1.44104	24	no
LBT-2mm/s	20_70	490	4.5	14.9	1.20077e+17	6.07209	1.34133e+13	0.380256	378334	0.123693	489.946	16.7386	-36.8718	1.44097	25	no
LBT-2mm/s	20_71	490	4.3	13.4	1.07988e+17	6.03959	1.30345e+13	0.386029	370071	0.106548	489.908	16.7484	-36.8718	1.44121	25	no
LBT-2mm/s	20_72	490	4.9	14.9	1.20077e+17	6.0725	1.34133e+13	0.380256	378340	0.157697	489.875	16.7517	-36.8718	1.44113	26	no
LBT-2mm/s	20_73	490	5.5	16.3	1.31359e+17	6.10007	1.37425e+13	0.375449	385473	0.207582	489.857	16.7614	-36.8718	1.44105	24	no
LBT-2mm/s	20_74	490	16.4	63.5	5.11736e+17	6.52937	1.98393e+13	0.310742	511122	0.776319	489.854	16.7699	-36.8718	1.44106	13	no
LBT-2mm/s	20_75	490	27.3	110.6	8.91306e+17	6.71306	2.30457e+13	0.288179	573351	0.944851	489.854	16.7749	-36.8718	1.4411	12	no
LBT-2mm/s	21_21	490	28.8	115.4	9.29989e+17	6.72733	2.33116e+13	0.286533	578415	0.954803	490.531	16.7377	-36.8151	1.28515	10	no
LBT-2mm/s	21_22	490	17.2	65.4	5.27047e+17	6.539	1.99978e+13	0.309492	514253	0.797497	490.541	16.7349	-36.8152	1.28547	15	no
LBT-2mm/s	21_23	490	5.5	15.3	1.233e+17	6.08079	1.35096e+13	0.37883	380433	0.207582	490.548	16.7319	-36.8153	1.28565	18	no
LBT-2mm/s	21_24	490	4.9	14.2	1.14435e+17	6.05791	1.32402e+13	0.382861	374573	0.157697	490.547	16.7256	-36.8152	1.28545	23	no
LBT-2mm/s	21_25	490	4.3	13.1	1.05571e+17	6.03276	1.29551e+13	0.387274	368332	0.106548	490.564	16.7085	-36.8152	1.28546	25	no
LBT-2mm/s	21_26	490	4.5	14.9	1.20077e+17	6.07209	1.34133e+13	0.380256	378334	0.123693	490.586	16.7033	-36.8153	1.28549	23	no
LBT-2mm/s	21_27	490	4.6	16.6	1.33777e+17	6.10512	1.38104e+13	0.374482	386930	0.132236	490.61	16.7007	-36.8152	1.28533	18	no
LBT-2mm/s	21_28	493	9.4	64.4	4.49637e+17	6.48727	1.91582e+13	0.316298	497605	0.483092	490.622	16.6976	-36.8151	1.28515	15	no
LBT-2mm/s	21_29	490	14.2	112.1	9.03395e+17	6.71758	2.31297e+13	0.287656	574952	0.706958	490.627	16.6949	-36.8151	1.2851	10	no
LBT-2mm/s	21_67	490	14.2	112.1	9.03395e+17	6.71758	2.31297e+13	0.287656	574952	0.706958	490.635	16.6666	-36.8725	1.44307	11	no
LBT-2mm/s	21_68	493	9.4	64.4	4.49637e+17	6.48727	1.91582e+13	0.316298	497605	0.483092	490.645	16.6695	-36.8723	1.44256	13	no
LBT-2mm/s	21_69	490	4.6	16.6	1.33777e+17	6.10512	1.38104e+13	0.374482	386930	0.132236	490.656	16.6764	-36.8721	1.44193	20	no
LBT-2mm/s	21_70	490	4.5	14.9	1.20077e+17	6.07209	1.34133e+13	0.380256	378334	0.123693	490.648	16.6848	-36.8721	1.44187	24	no
LBT-2mm/s	21_71	490	4.3	13.1	1.05571e+17	6.03276	1.29551e+13	0.387274	368332	0.106548	490.605	16.6948	-36.8721	1.44201	25	no
LBT-2mm/s	21_72	490	4.9	14.2	1.14435e+17	6.05791	1.32402e+13	0.382861	374573	0.157697	490.573	16.6989	-36.8721	1.44192	24	no
LBT-2mm/s	21_73	490	5.5	15.3	1.233e+17	6.08079	1.35096e+13	0.37883	380433	0.207582	490.559	16.7001	-36.8721	1.44184	20	no
LBT-2mm/s	21_74	490	17.2	65.4	5.27047e+17	6.539	1.99978e+13	0.309492	514253	0.797497	490.556	16.7004	-36.8721	1.44183	13	no
LBT-2mm/s	21_75	490	28.8	115.4	9.29989e+17	6.72733	2.33116e+13	0.286533	578415	0.954803	490.556	16.7011	-36.8721	1.44186	12	no
LBT-2mm/s	22_21	491	27.1	106.1	8.15019e+17	6.68309	2.24956e+13	0.291683	562830	0.943373	491.136	16.6687	-36.8161	1.2878	10	no
LBT-2mm/s	22_22	491	16.3	60.8	4.67042e+17	6.4996	1.93557e+13	0.314654	501536	0.773531	491.146	16.6674	-36.8162	1.28807	15	no
LBT-2mm/s	22_23	491	5.5	15.4	1.18297e+17	6.06821	1.33594e+13	0.381062	377170	0.207582	491.159	16.6655	-36.8162	1.28823	18	no
LBT-2mm/s	22_24	491	4.9	14.1	1.08311e+17	6.04127	1.3045e+13	0.385865	370312	0.157697	491.163	16.6634	-36.8162	1.28807	23	no
LBT-2mm/s	22_25	491	4.3	12.8	9.83246e+16	6.01135	1.27087e+13	0.391215	362923	0.106548	491.174	16.6586	-36.8162	1.2881	25	no
LBT-2mm/s	22_26	491	4.6	15.2	1.1676e+17	6.06373	1.33123e+13	0.381769	376139	0.132236	491.198	16.6552	-36.8162	1.28819	23	no
LBT-2mm/s	22_27	491	4.9	17.5	1.34428e+17	6.10688	1.38285e+13	0.374225	387325	0.157697	491.224	16.6515	-36.8162	1.2881	18	no
LBT-2mm/s	22_28	493	9.6	65	4.53826e+17	6.49028	1.92063e+13	0.315895	498562	0.494798	491.234	16.6493	-36.8161	1.28795	15	no
LBT-2mm/s	22_29	491	14.3	112.5	8.64181e+17	6.70269	2.28542e+13	0.289384	569695	0.7105	491.236	16.6477	-36.8161	1.2879	10	no
LBT-2mm/s	22_67	491	14.3	112.5	8.64181e+17	6.70269	2.28542e+13	0.289384	569695	0.7105	491.263	16.6331	-36.8728	1.44385	10	no
LBT-2mm/s	22_68	493	9.6	65	4.53826e+17	6.49028	1.92063e+13	0.315895	498562	0.494798	491.271	16.635	-36.8727	1.44344	15	no
LBT-2mm/s	22_69	491	4.9	17.5	1.34428e+17	6.10688	1.38285e+13	0.374225	387325	0.157697	491.277	16.6388	-36.8725	1.44293	18	no
LBT-2mm/s	22_70	491	4.6	15.2	1.1676e+17	6.06373	1.33123e+13	0.381769	376139	0.132236	491.267	16.6424	-36.8725	1.44287	23	no
LBT-2mm/s	22_71	491	4.3	12.8	9.83246e+16	6.01135	1.27087e+13	0.391215	362923	0.106548	491.225	16.6464	-36.8725	1.44297	25	no
LBT-2mm/s	22_72	491	4.9	14.1	1.08311e+17	6.04127	1.3045e+13	0.385865	370312	0.157697	491.197	16.648	-36.8725	1.44288	23	no
LBT-2mm/s	22_73	491	5.5	15.4	1.18297e+17	6.06821	1.33594e+13	0.381062	377170	0.207582	491.186	16.6498	-36.8724	1.4428	18	no
LBT-2mm/s	22_74	491	16.3	60.8	4.67042e+17	6.4996	1.93557e+13	0.314654	501536	0.773531	491.184	16.6503	-36.8724	1.4428	15	no
LBT-2mm/s	22_75	491	27.1	106.1	8.15019e+17	6.68309	2.24956e+13	0.291683	562830	0.943373	491.183	16.6502	-36.8724	1.44282	10	no
LBT-2mm/s	23_21	491	26.6	113.3	8.70326e+17	6.70507	2.2898e+13	0.289107	570531	0.93951	491.681	16.6206	-36.8171	1.29072	10	no
LBT-2mm/s	23_22	491	16	64.3	4.93927e+17	6.51782	1.96504e+13	0.312251	507385	0.76497	491.694	16.6196	-36.8172	1.29094	15	no
LBT-2mm/s	23_23	491	5.4	15.2	1.1676e+17	6.06422	1.33123e+13	0.381769	376146	0.199379	491.714	16.6177	-36.8173	1.29107	18	no
LBT-2mm/s	23_24	491	4.9	14.2	1.09079e+17	6.04341	1.30699e+13	0.385478	370856	0.157697	491.726	16.6168	-36.8172	1.29095	23	no
LBT-2mm/s	23_25	491	4.3	13.1	1.00629e+17	6.01832	1.27885e+13	0.389926	364677	0.106548	491.731	16.618	-36.8172	1.29099	25	no
LBT-2mm/s	23_26	491	4.5	14.3	1.09847e+17	6.04512	1.30947e+13	0.385093	371393	0.123693	491.75	16.616	-36.8173	1.29108	23	no
LBT-2mm/s	23_27	491	4.7	15.4	1.18297e+17	6.06781	1.33594e+13	0.381062	377164	0.140754	491.777	16.6123	-36.8173	1.29104	18	no
LBT-2mm/s	23_28	493	9.9	66.4	4.636e+17	6.4972	1.93171e+13	0.314974	500768	0.511932	491.788	16.6103	-36.8172	1.29091	15	no
LBT-2mm/s	23_29	491	15.1	117.4	9.01821e+17	6.71699	2.31188e+13	0.287724	574744	0.737445	491.793	16.6091	-36.8172	1.29087	10	no
LBT-2mm/s	23_67	491	15.1	117.4	9.01821e+17	6.71699	2.31188e+13	0.287724	574744	0.737445	491.814	16.5962	-36.8732	1.44484	10	no
LBT-2mm/s	23_68	493	9.9	66.4	4.636e+17	6.4972	1.93171e+13	0.314974	500768	0.511932	491.821	16.597	-36.8731	1.44451	15	no
LBT-2mm/s	23_69	491	4.7	15.4	1.18297e+17	6.06781	1.33594e+13	0.381062	377164	0.140754	491.827	16.599	-36.8729	1.44409	18	no
LBT-2mm/s	23_70	491	4.5	14.3	1.09847e+17	6.04512	1.30947e+13	0.385093	371393	0.123693	491.82	16.6018	-36.8729	1.44403	23	no
LBT-2mm/s	23_71	491	4.3	13.1	1.00629e+17	6.01832	1.27885e+13	0.389926	364677	0.106548	491.782	16.6075	-36.8729	1.44407	25	no
LBT-2mm/s	23_72	491	4.9	14.2	1.09079e+17	6.04341	1.30699e+13	0.385478	370856	0.157697	491.754	16.6103	-36.8729	1.44399	23	no
LBT-2mm/s	23_73	491	5.4	15.2	1.1676e+17	6.06422	1.33123e+13	0.381769	376146	0.199379	491.743	16.6088	-36.8728	1.44391	18	no
LBT-2mm/s	23_74	491	16	64.3	4.93927e+17	6.51782	1.96504e+13	0.312251	507385	0.76497	491.742	16.6076	-36.8728	1.4439	15	no
LBT-2mm/s	23_75	491	26.6	113.3	8.70326e+17	6.70507	2.2898e+13	0.289107	570531	0.93951	491.741	16.6071	-36.8728	1.44391	10	no
LBT-2mm/s	24_21	492	25.4	114.3	8.37015e+17	6.69199	2.2658e+13	0.290635	565941	0.929175	492.153	16.5901	-36.8182	1.29366	10	no
LBT-2mm/s	24_22	492	15.5	65.2	4.77457e+17	6.50677	1.94713e+13	0.313705	503833	0.750028	492.162	16.5895	-36.8183	1.29384	15	no
LBT-2mm/s	24_23	492	5.6	16.1	1.179e+17	6.0672	1.33472e+13	0.381244	376907	0.215736	492.174	16.588	-36.8183	1.29394	18	no
LBT-2mm/s	24_24	492	5	14.3	1.04718e+17	6.03115	1.29267e+13	0.387721	367723	0.166115	492.181	16.5869	-36.8183	1.29386	23	no
LBT-2mm/s	24_25	492	4.4	12.4	9.08047e+16	5.98768	1.24386e+13	0.395682	356966	0.115129	492.195	16.5863	-36.8183	1.29392	25	no
LBT-2mm/s	24_26	492	4.9	17	1.2449e+17	6.08347	1.35447e+13	0.378315	381190	0.157697	492.223	16.5851	-36.8183	1.294	23	no
LBT-2mm/s	24_27	492	5.4	21.6	1.58176e+17	6.15697	1.44494e+13	0.365732	400645	0.199379	492.253	16.5826	-36.8183	1.29396	18	no
LBT-2mm/s	24_28	493	11.8	74.2	5.1806e+17	6.53338	1.99052e+13	0.31022	512424	0.609136	492.264	16.5811	-36.8183	1.29387	15	no
LBT-2mm/s	24_29	492	18.1	126.7	9.27819e+17	6.72655	2.32969e+13	0.286623	578135	0.819068	492.268	16.5802	-36.8183	1.29384	10	no
LBT-2mm/s	24_67	492	18.1	126.7	9.27819e+17	6.72655	2.32969e+13	0.286623	578135	0.819068	492.286	16.5656	-36.8736	1.44593	10	no
LBT-2mm/s	24_68	493	11.8	74.2	5.1806e+17	6.53338	1.99052e+13	0.31022	512424	0.609136	492.292	16.566	-36.8735	1.44565	15	no
LBT-2mm/s	24_69	492	5.4	21.6	1.58176e+17	6.15697	1.44494e+13	0.365732	400645	0.199379	492.296	16.5679	-36.8733	1.44529	18	no
LBT-2mm/s	24_70	492	4.9	17	1.2449e+17	6.08347	1.35447e+13	0.378315	381190	0.157697	492.288	16.5721	-36.8733	1.44522	23	no
LBT-2mm/s	24_71	492	4.4	12.4	9.08047e+16	5.98768	1.24386e+13	0.395682	356966	0.115129	492.248	16.5785	-36.8733	1.44523	25	no
LBT-2mm/s	24_72	492	5	14.3	1.04718e+17	6.03115	1.29267e+13	0.387721	367723	0.166115	492.22	16.58	-36.8733	1.44514	23	no
LBT-2mm/s	24_73	492	5.6	16.1	1.179e+17	6.0672	1.33472e+13	0.381244	376907	0.215736	492.209	16.5782	-36.8733	1.44506	18	no
LBT-2mm/s	24_74	492	15.5	65.2	4.77457e+17	6.50677	1.94713e+13	0.313705	503833	0.750028	492.207	16.5769	-36.8732	1.44504	15	no
LBT-2mm/s	24_75	492	25.4	114.3	8.37015e+17	6.69199	2.2658e+13	0.290635	565941	0.929175	492.206	16.5764	-36.8732	1.44505	10	no
LBT-2mm/s	25_21	492	26.8	133.5	9.77616e+17	6.74415	2.36281e+13	0.284611	584424	0.941085	492.564	16.5634	-36.8193	1.29668	10	no
LBT-2mm/s	25_22	492	16.1	74.5	5.45561e+17	6.5503	2.01851e+13	0.308035	517943	0.767856	492.571	16.563	-36.8194	1.29684	15	no
LBT-2mm/s	25_23	492	5.4	15.5	1.13506e+17	6.05565	1.32111e+13	0.383305	373941	0.199379	492.577	16.5631	-36.8194	1.29695	18	no
LBT-2mm/s	25_24	492	4.9	14.1	1.03254e+17	6.02685	1.28777e+13	0.388499	366646	0.157697	492.577	16.5646	-36.8194	1.2969	23	no
LBT-2mm/s	25_25	492	4.3	12.6	9.22693e+16	5.99228	12492473939458	0.394779	358154	0.106548	492.588	16.5707	-36.8194	1.29695	25	no
LBT-2mm/s	25_26	492	4.6	14.5	1.06183e+17	6.03501	1.29753e+13	0.386955	368783	0.132236	492.613	16.5693	-36.8194	1.29702	23	no
LBT-2mm/s	25_27	492	4.8	16.4	1.20097e+17	6.07248	1.34139e+13	0.380247	378352	0.149242	492.642	16.5637	-36.8194	1.29699	18	no
LBT-2mm/s	25_28	493	11.3	65.3	4.5592e+17	6.49177	1.92302e+13	0.315696	499038	0.585379	492.653	16.5612	-36.8194	1.29692	15	no
LBT-2mm/s	25_29	492	17.8	114.1	8.3555e+17	6.69141	2.26473e+13	0.290704	565736	0.81213	492.657	16.5601	-36.8194	1.2969	10	no
LBT-2mm/s	25_67	492	17.8	114.1	8.3555e+17	6.69141	2.26473e+13	0.290704	565736	0.81213	492.683	16.546	-36.874	1.4471	10	no
LBT-2mm/s	25_68	493	11.3	65.3	4.5592e+17	6.49177	1.92302e+13	0.315696	499038	0.585379	492.687	16.5464	-36.8739	1.44686	15	no
LBT-2mm/s	25_69	492	4.8	16.4	1.20097e+17	6.07248	1.34139e+13	0.380247	378352	0.149242	492.689	16.5486	-36.8738	1.44655	18	no
LBT-2mm/s	25_70	492	4.6	14.5	1.06183e+17	6.03501	1.29753e+13	0.386955	368783	0.132236	492.678	16.5532	-36.8738	1.44648	23	no
LBT-2mm/s	25_71	492	4.3	12.6	9.22693e+16	5.99228	12492473939458	0.394779	358154	0.106548	492.638	16.5585	-36.8738	1.44647	25	no
LBT-2mm/s	25_72	492	4.9	14.1	1.03254e+17	6.02685	1.28777e+13	0.388499	366646	0.157697	492.612	16.5587	-36.8737	1.44638	23	no
LBT-2mm/s	25_73	492	5.4	15.5	1.13506e+17	6.05565	1.32111e+13	0.383305	373941	0.199379	492.604	16.556	-36.8737	1.4463	18	no
LBT-2mm/s	25_74	492	16.1	74.5	5.45561e+17	6.5503	2.01851e+13	0.308035	517943	0.767856	492.604	16.5542	-36.8737	1.44627	15	no
LBT-2mm/s	25_75	492	26.8	133.5	9.77616e+17	6.74415	2.36281e+13	0.284611	584424	0.941085	492.603	16.5535	-36.8737	1.44626	10	no
LBT-2mm/s	26_21	493	28.3	120.4	8.40625e+17	6.69343	2.26843e+13	0.290466	566445	0.951696	492.905	16.5502	-36.8205	1.29986	10	no
LBT-2mm/s	26_22	493	16.7	67.6	4.71979e+17	6.50302	1.94107e+13	0.314201	502630	0.784493	492.91	16.5504	-36.8205	1.3	15	no
LBT-2mm/s	26_23	493	5.1	14.7	1.02634e+17	6.02514	1.28568e+13	0.388832	366189	0.174495	492.916	16.5511	-36.8206	1.30011	18	no
LBT-2mm/s	26_24	493	4.7	13.7	9.56525e+16	6.00368	1.26145e+13	0.392755	360856	0.140754	492.916	16.5523	-36.8206	1.30009	23	no
LBT-2mm/s	26_25	493	4.3	12.6	8.79724e+16	5.97801	1.23327e+13	0.397477	354616	0.106548	492.927	16.5522	-36.8206	1.30015	25	no
LBT-2mm/s	26_26	493	4.5	14	9.77471e+16	6.00995	1.26885e+13	0.391544	362483	0.123693	492.953	16.5507	-36.8206	1.30023	23	no
LBT-2mm/s	26_27	493	4.7	15.4	1.07522e+17	6.0389	1.30193e+13	0.386266	369747	0.140754	492.982	16.5481	-36.8206	1.30023	18	no
LBT-2mm/s	26_28	493	10.6	61.4	4.28691e+17	6.47182	1.89131e+13	0.318376	492711	0.549968	492.993	16.5467	-36.8206	1.30016	15	no
LBT-2mm/s	26_29	493	16.4	107.4	7.4986e+17	6.6553	2.19952e+13	0.294992	553205	0.776319	492.997	16.546	-36.8206	1.30015	10	no
LBT-2mm/s	26_67	493	16.4	107.4	7.4986e+17	6.6553	2.19952e+13	0.294992	553205	0.776319	493.018	16.5324	-36.8745	1.4484	10	no
LBT-2mm/s	26_68	493	10.6	61.4	4.28691e+17	6.47182	1.89131e+13	0.318376	492711	0.549968	493.022	16.5327	-36.8744	1.44819	15	no
LBT-2mm/s	26_69	493	4.7	15.4	1.07522e+17	6.0389	1.30193e+13	0.386266	369747	0.140754	493.024	16.5342	-36.8743	1.44791	18	no
LBT-2mm/s	26_70	493	4.5	14	9.77471e+16	6.00995	1.26885e+13	0.391544	362483	0.123693	493.013	16.537	-36.8743	1.44784	23	no
LBT-2mm/s	26_71	493	4.3	12.6	8.79724e+16	5.97801	1.23327e+13	0.397477	354616	0.106548	492.975	16.54	-36.8743	1.44782	25	no
LBT-2mm/s	26_72	493	4.7	13.7	9.56525e+16	6.00368	1.26145e+13	0.392755	360856	0.140754	492.948	16.5401	-36.8742	1.44773	23	no
LBT-2mm/s	26_73	493	5.1	14.7	1.02634e+17	6.02514	1.28568e+13	0.388832	366189	0.174495	492.938	16.5398	-36.8742	1.44764	18	no
LBT-2mm/s	26_74	493	16.7	67.6	4.71979e+17	6.50302	1.94107e+13	0.314201	502630	0.784493	492.937	16.5391	-36.8742	1.44761	15	no
LBT-2mm/s	26_75	493	28.3	120.4	8.40625e+17	6.69343	2.26843e+13	0.290466	566445	0.951696	492.937	16.5384	-36.8742	1.44759	10	no
LBT-2mm/s	27_21	493	27.5	126.7	8.84611e+17	6.71053	2.29988e+13	0.288473	572457	0.946291	493.178	16.5407	-36.8217	1.3031	10	no
LBT-2mm/s	27_22	493	16.4	70.7	4.93623e+17	6.51761	1.96472e+13	0.312278	507320	0.776319	493.183	16.5409	-36.8217	1.30321	15	no
LBT-2mm/s	27_23	493	5.2	14.7	1.02634e+17	6.02518	1.28568e+13	0.388832	366190	0.182834	493.189	16.5412	-36.8217	1.30331	18	no
LBT-2mm/s	27_24	493	4.8	13.5	9.42561e+16	5.99936	1.25645e+13	0.39358	359755	0.149242	493.19	16.5418	-36.8217	1.30332	23	no
LBT-2mm/s	27_25	493	4.3	12.3	8.58778e+16	5.97081	1.22527e+13	0.398849	352841	0.106548	493.199	16.5425	-36.8218	1.3034	25	no
LBT-2mm/s	27_26	493	4.5	13.5	9.42561e+16	5.99903	1.25645e+13	0.39358	359750	0.123693	493.222	16.5415	-36.8218	1.30348	23	no
LBT-2mm/s	27_27	493	4.7	14.7	1.02634e+17	6.02487	1.28568e+13	0.388832	366186	0.140754	493.249	16.5397	-36.8218	1.30349	18	no
LBT-2mm/s	27_28	493	11	69.4	4.84546e+17	6.51157	1.9549e+13	0.313072	505374	0.570516	493.259	16.5389	-36.8218	1.30343	15	no
LBT-2mm/s	27_29	493	17.3	124.1	8.66458e+17	6.70357	2.28705e+13	0.289281	570005	0.800008	493.262	16.5384	-36.8218	1.30342	10	no
LBT-2mm/s	27_67	493	17.3	124.1	8.66458e+17	6.70357	2.28705e+13	0.289281	570005	0.800008	493.276	16.524	-36.875	1.44979	10	no
LBT-2mm/s	27_68	493	11	69.4	4.84546e+17	6.51157	1.9549e+13	0.313072	505374	0.570516	493.278	16.524	-36.8749	1.4496	15	no
LBT-2mm/s	27_69	493	4.7	14.7	1.02634e+17	6.02487	1.28568e+13	0.388832	366186	0.140754	493.279	16.5242	-36.8748	1.44935	18	no
LBT-2mm/s	27_70	493	4.5	13.5	9.42561e+16	5.99903	1.25645e+13	0.39358	359750	0.123693	493.275	16.5247	-36.8748	1.44928	23	no
LBT-2mm/s	27_71	493	4.3	12.3	8.58778e+16	5.97081	1.22527e+13	0.398849	352841	0.106548	493.249	16.5267	-36.8748	1.44922	25	no
LBT-2mm/s	27_72	493	4.8	13.5	9.42561e+16	5.99936	1.25645e+13	0.39358	359755	0.149242	493.224	16.528	-36.8747	1.44912	23	no
LBT-2mm/s	27_73	493	5.2	14.7	1.02634e+17	6.02518	1.28568e+13	0.388832	366190	0.182834	493.207	16.5278	-36.8747	1.44903	18	no
LBT-2mm/s	27_74	493	16.4	70.7	4.93623e+17	6.51761	1.96472e+13	0.312278	507320	0.776319	493.203	16.5274	-36.8747	1.44899	15	no
LBT-2mm/s	27_75	493	27.5	126.7	8.84611e+17	6.71053	2.29988e+13	0.288473	572457	0.946291	493.202	16.527	-36.8747	1.44897	10	no
LBT-2mm/s	28_21	493	24.3	112.2	7.83373e+17	6.66987	2.22564e+13	0.29325	558235	0.918222	493.383	16.534	-36.8229	1.30643	10	no
LBT-2mm/s	28_22	493	14.8	63.3	4.41956e+17	6.48168	1.90693e+13	0.317046	495832	0.727624	493.389	16.5342	-36.8229	1.30652	15	no
LBT-2mm/s	28_23	493	5.2	14.3	9.98417e+16	6.01688	1.27614e+13	0.390363	364094	0.182834	493.395	16.5355	-36.8229	1.30663	18	no
LBT-2mm/s	28_24	493	4.8	13.3	9.28597e+16	5.99489	1.2514e+13	0.394419	358639	0.149242	493.398	16.5373	-36.8229	1.30667	23	no
LBT-2mm/s	28_25	493	4.3	12.3	8.58778e+16	5.97081	1.22527e+13	0.398849	352841	0.106548	493.411	16.5383	-36.823	1.30677	25	no
LBT-2mm/s	28_26	493	4.6	13.6	9.49543e+16	6.00138	1.25896e+13	0.393166	360305	0.132236	493.436	16.5376	-36.823	1.30686	23	no
LBT-2mm/s	28_27	493	4.8	14.8	1.03333e+17	6.027	1.28803e+13	0.388457	366704	0.149242	493.467	16.5361	-36.823	1.30687	18	no
LBT-2mm/s	28_28	493	11.5	70	4.88735e+17	6.51437	1.95944e+13	0.312703	506276	0.595032	493.48	16.5351	-36.823	1.30682	15	no
LBT-2mm/s	28_29	493	18.1	125.2	8.74138e+17	6.70653	2.2925e+13	0.288937	571047	0.819068	493.485	16.5346	-36.823	1.30682	10	no
LBT-2mm/s	28_67	493	18.1	125.2	8.74138e+17	6.70653	2.2925e+13	0.288937	571047	0.819068	493.497	16.5174	-36.8755	1.4513	10	no
LBT-2mm/s	28_68	493	11.5	70	4.88735e+17	6.51437	1.95944e+13	0.312703	506276	0.595032	493.499	16.5175	-36.8755	1.45112	15	no
LBT-2mm/s	28_69	493	4.8	14.8	1.03333e+17	6.027	1.28803e+13	0.388457	366704	0.149242	493.498	16.5184	-36.8754	1.45089	18	no
LBT-2mm/s	28_70	493	4.6	13.6	9.49543e+16	6.00138	1.25896e+13	0.393166	360305	0.132236	493.489	16.5201	-36.8753	1.45081	23	no
LBT-2mm/s	28_71	493	4.3	12.3	8.58778e+16	5.97081	1.22527e+13	0.398849	352841	0.106548	493.454	16.5219	-36.8753	1.45074	25	no
LBT-2mm/s	28_72	493	4.8	13.3	9.28597e+16	5.99489	1.2514e+13	0.394419	358639	0.149242	493.43	16.5219	-36.8753	1.45063	23	no
LBT-2mm/s	28_73	493	5.2	14.3	9.98417e+16	6.01688	1.27614e+13	0.390363	364094	0.182834	493.422	16.5211	-36.8752	1.45053	18	no
LBT-2mm/s	28_74	493	14.8	63.3	4.41956e+17	6.48168	1.90693e+13	0.317046	495832	0.727624	493.421	16.5203	-36.8752	1.45048	15	no
LBT-2mm/s	28_75	493	24.3	112.2	7.83373e+17	6.66987	2.22564e+13	0.29325	558235	0.918222	493.42	16.5198	-36.8752	1.45045	10	no
LBT-2mm/s	29_21	493	24.9	112.3	7.84071e+17	6.67017	2.22617e+13	0.293215	558338	0.924384	493.535	16.5342	-36.8241	1.30997	10	no
LBT-2mm/s	29_22	493	15.1	63.6	4.44051e+17	6.48322	1.90937e+13	0.316841	496318	0.737445	493.541	16.5342	-36.8242	1.31006	15	no
LBT-2mm/s	29_23	493	5.2	14.8	1.03333e+17	6.02723	1.28803e+13	0.388457	366707	0.182834	493.55	16.5338	-36.8242	1.31016	18	no
LBT-2mm/s	29_24	493	4.7	13.5	9.42561e+16	5.99927	1.25645e+13	0.39358	359754	0.140754	493.557	16.5344	-36.8242	1.31021	23	no
LBT-2mm/s	29_25	493	4.2	12.2	8.51796e+16	5.96813	1.22257e+13	0.399315	352239	0.097957	493.571	16.5379	-36.8243	1.31032	25	no
LBT-2mm/s	29_26	493	4.7	15.2	1.06125e+17	6.03495	1.29734e+13	0.386985	368743	0.140754	493.597	16.5373	-36.8243	1.31042	23	no
LBT-2mm/s	29_27	493	5.2	18.2	1.27071e+17	6.08987	1.362e+13	0.377217	382822	0.182834	493.627	16.5345	-36.8243	1.31043	18	no
LBT-2mm/s	29_28	493	12.4	72.7	5.07587e+17	6.52671	1.97957e+13	0.311088	510261	0.636031	493.64	16.5326	-36.8243	1.3104	15	no
LBT-2mm/s	29_29	493	19.6	127.2	8.88102e+17	6.71185	2.30233e+13	0.288319	572924	0.850277	493.645	16.5314	-36.8243	1.3104	10	no
LBT-2mm/s	29_67	493	19.6	127.2	8.88102e+17	6.71185	2.30233e+13	0.288319	572924	0.850277	493.676	16.512	-36.8761	1.45295	10	no
LBT-2mm/s	29_68	493	12.4	72.7	5.07587e+17	6.52671	1.97957e+13	0.311088	510261	0.636031	493.678	16.5122	-36.8761	1.45278	15	no
LBT-2mm/s	29_69	493	5.2	18.2	1.27071e+17	6.08987	1.362e+13	0.377217	382822	0.182834	493.677	16.5133	-36.876	1.45255	18	no
LBT-2mm/s	29_70	493	4.7	15.2	1.06125e+17	6.03495	1.29734e+13	0.386985	368743	0.140754	493.666	16.5155	-36.8759	1.45247	23	no
LBT-2mm/s	29_71	493	4.2	12.2	8.51796e+16	5.96813	1.22257e+13	0.399315	352239	0.097957	493.629	16.5185	-36.8759	1.45238	25	no
LBT-2mm/s	29_72	493	4.7	13.5	9.42561e+16	5.99927	1.25645e+13	0.39358	359754	0.140754	493.603	16.5186	-36.8759	1.45226	23	no
LBT-2mm/s	29_73	493	5.2	14.8	1.03333e+17	6.02723	1.28803e+13	0.388457	366707	0.182834	493.593	16.5166	-36.8758	1.45216	18	no
LBT-2mm/s	29_74	493	15.1	63.6	4.44051e+17	6.48322	1.90937e+13	0.316841	496318	0.737445	493.591	16.5153	-36.8758	1.4521	15	no
LBT-2mm/s	29_75	493	24.9	112.3	7.84071e+17	6.67017	2.22617e+13	0.293215	558338	0.924384	493.589	16.5147	-36.8758	1.45206	10	no
LBT-2mm/s	30_21	493	24.9	115.7	8.0781e+17	6.68012	2.24417e+13	0.292034	561796	0.924384	493.652	16.5295	-36.8254	1.3135	10	no
LBT-2mm/s	30_22	493	15	65.2	4.55222e+17	6.49128	1.92222e+13	0.315762	498880	0.734208	493.658	16.5299	-36.8255	1.31358	15	no
LBT-2mm/s	30_23	493	5.1	14.6	1.01936e+17	6.02309	1.28331e+13	0.38921	365670	0.174495	493.665	16.5312	-36.8255	1.31369	18	no
LBT-2mm/s	30_24	493	4.7	13.5	9.42561e+16	5.99927	1.25645e+13	0.39358	359754	0.140754	493.669	16.5332	-36.8255	1.31376	23	no
LBT-2mm/s	30_25	493	4.3	12.4	8.6576e+16	5.97322	1.22795e+13	0.398388	353437	0.106548	493.682	16.5355	-36.8256	1.3139	25	no
LBT-2mm/s	30_26	493	4.6	14.1	9.84453e+16	6.01222	1.27129e+13	0.391147	363023	0.132236	493.706	16.5349	-36.8256	1.31401	23	no
LBT-2mm/s	30_27	493	4.8	15.7	1.09616e+17	6.04482	1.30873e+13	0.385208	371235	0.149242	493.733	16.5331	-36.8256	1.31405	18	no
LBT-2mm/s	30_28	493	10.9	65.8	4.59411e+17	6.49425	1.92698e+13	0.315366	499827	0.565458	493.744	16.5323	-36.8256	1.31403	15	no
LBT-2mm/s	30_29	493	16.9	115.9	8.09206e+17	6.6807	2.24522e+13	0.291966	561997	0.789786	493.748	16.5319	-36.8256	1.31403	10	no
LBT-2mm/s	30_67	493	16.9	115.9	8.09206e+17	6.6807	2.24522e+13	0.291966	561997	0.789786	493.795	16.5103	-36.8767	1.45466	10	no
LBT-2mm/s	30_68	493	10.9	65.8	4.59411e+17	6.49425	1.92698e+13	0.315366	499827	0.565458	493.797	16.5106	-36.8767	1.45449	15	no
LBT-2mm/s	30_69	493	4.8	15.7	1.09616e+17	6.04482	1.30873e+13	0.385208	371235	0.149242	493.796	16.5119	-36.8766	1.45427	18	no
LBT-2mm/s	30_70	493	4.6	14.1	9.84453e+16	6.01222	1.27129e+13	0.391147	363023	0.132236	493.786	16.5144	-36.8766	1.45417	23	no
LBT-2mm/s	30_71	493	4.3	12.4	8.6576e+16	5.97322	1.22795e+13	0.398388	353437	0.106548	493.749	16.5175	-36.8765	1.45407	25	no
LBT-2mm/s	30_72	493	4.7	13.5	9.42561e+16	5.99927	1.25645e+13	0.39358	359754	0.140754	493.722	16.5175	-36.8765	1.45395	23	no
LBT-2mm/s	30_73	493	5.1	14.6	1.01936e+17	6.02309	1.28331e+13	0.38921	365670	0.174495	493.714	16.515	-36.8764	1.45383	18	no
LBT-2mm/s	30_74	493	15	65.2	4.55222e+17	6.49128	1.92222e+13	0.315762	498880	0.734208	493.713	16.5134	-36.8764	1.45376	15	no
LBT-2mm/s	30_75	493	24.9	115.7	8.0781e+17	6.68012	2.24417e+13	0.292034	561796	0.924384	493.712	16.5127	-36.8764	1.45372	10	no
LBT-2mm/s	31_21	493	24.7	110.1	7.68711e+17	6.66357	2.21431e+13	0.294002	556056	0.922381	493.718	16.5253	-36.8268	1.31713	10	no
LBT-2mm/s	31_22	493	14.9	62.2	4.34276e+17	6.47601	1.89793e+13	0.31781	494034	0.730935	493.724	16.5257	-36.8268	1.31721	15	no
LBT-2mm/s	31_23	493	5.1	14.2	9.91435e+16	6.01473	1.27372e+13	0.390753	363562	0.174495	493.733	16.5269	-36.8268	1.31732	18	no
LBT-2mm/s	31_24	493	4.7	13.2	9.21615e+16	5.99253	1.24885e+13	0.394845	358075	0.140754	493.739	16.529	-36.8268	1.3174	23	no
LBT-2mm/s	31_25	493	4.2	12.1	8.44814e+16	5.96567	1.21986e+13	0.399786	351636	0.097957	493.75	16.5322	-36.8269	1.31756	25	no
LBT-2mm/s	31_26	493	5.7	22.3	1.55697e+17	6.15217	1.43879e+13	0.366546	399334	0.22384	493.775	16.5317	-36.8269	1.31767	23	no
LBT-2mm/s	31_27	493	7.1	32.4	2.26215e+17	6.26823	1.59149e+13	0.34784	431543	0.331496	493.805	16.53	-36.827	1.31771	18	no
LBT-2mm/s	31_28	493	11.7	66.3	4.62902e+17	6.49671	1.93092e+13	0.315039	500612	0.604484	493.815	16.5293	-36.827	1.31769	15	no
LBT-2mm/s	31_29	493	16.3	100.1	6.98892e+17	6.63192	2.15811e+13	0.297822	545201	0.773531	493.818	16.529	-36.827	1.3177	10	no
LBT-2mm/s	31_67	493	16.3	100.1	6.98892e+17	6.63192	2.15811e+13	0.297822	545201	0.773531	493.861	16.5083	-36.8774	1.45646	10	no
LBT-2mm/s	31_68	493	11.7	66.3	4.62902e+17	6.49671	1.93092e+13	0.315039	500612	0.604484	493.862	16.5086	-36.8773	1.45629	15	no
LBT-2mm/s	31_69	493	7.1	32.4	2.26215e+17	6.26823	1.59149e+13	0.34784	431543	0.331496	493.862	16.5095	-36.8772	1.45606	18	no
LBT-2mm/s	31_70	493	5.7	22.3	1.55697e+17	6.15217	1.43879e+13	0.366546	399334	0.22384	493.856	16.5106	-36.8772	1.45596	23	no
LBT-2mm/s	31_71	493	4.2	12.1	8.44814e+16	5.96567	1.21986e+13	0.399786	351636	0.097957	493.823	16.5119	-36.8772	1.45584	25	no
LBT-2mm/s	31_72	493	4.7	13.2	9.21615e+16	5.99253	1.24885e+13	0.394845	358075	0.140754	493.799	16.5114	-36.8771	1.45571	23	no
LBT-2mm/s	31_73	493	5.1	14.2	9.91435e+16	6.01473	1.27372e+13	0.390753	363562	0.174495	493.793	16.5097	-36.8771	1.45559	18	no
LBT-2mm/s	31_74	493	14.9	62.2	4.34276e+17	6.47601	1.89793e+13	0.31781	494034	0.730935	493.793	16.5082	-36.8771	1.45552	15	no
LBT-2mm/s	31_75	493	24.7	110.1	7.68711e+17	6.66357	2.21431e+13	0.294002	556056	0.922381	493.793	16.5073	-36.877	1.45547	10	no
LBT-2mm/s	32_21	493	26.1	109.7	7.65918e+17	6.66236	2.21214e+13	0.294147	555637	0.935394	493.75	16.5204	-36.8281	1.32094	10	no
LBT-2mm/s	32_22	493	15.6	62.3	4.34975e+17	6.47653	1.89875e+13	0.31774	494199	0.753085	493.756	16.5207	-36.8282	1.32102	15	no
LBT-2mm/s	32_23	493	5.1	14.8	1.03333e+17	6.02719	1.28803e+13	0.388457	366706	0.174495	493.763	16.5217	-36.8282	1.32113	18	no
LBT-2mm/s	32_24	493	4.7	13.6	9.49543e+16	6.00149	1.25896e+13	0.393166	360307	0.140754	493.768	16.5241	-36.8282	1.32121	23	no
LBT-2mm/s	32_25	493	4.3	12.3	8.58778e+16	5.97081	1.22527e+13	0.398849	352841	0.106548	493.778	16.5286	-36.8283	1.32136	25	no
LBT-2mm/s	32_26	493	5.1	18.7	1.30562e+17	6.09809	1.372e+13	0.375773	384984	0.174495	493.799	16.5286	-36.8283	1.32148	23	no
LBT-2mm/s	32_27	493	5.9	25.1	1.75247e+17	6.18868	1.48549e+13	0.360498	409267	0.239892	493.824	16.5268	-36.8283	1.32153	18	no
LBT-2mm/s	32_28	493	11.2	62.3	4.34975e+17	6.47653	1.89875e+13	0.31774	494199	0.580476	493.833	16.5257	-36.8283	1.32151	15	no
LBT-2mm/s	32_29	493	16.4	99.5	6.94703e+17	6.62993	2.15461e+13	0.298065	544523	0.776319	493.836	16.5252	-36.8283	1.32152	10	no
LBT-2mm/s	32_67	493	16.4	99.5	6.94703e+17	6.62993	2.15461e+13	0.298065	544523	0.776319	493.899	16.5038	-36.8781	1.45835	10	no
LBT-2mm/s	32_68	493	11.2	62.3	4.34975e+17	6.47653	1.89875e+13	0.31774	494199	0.580476	493.9	16.5041	-36.878	1.45817	15	no
LBT-2mm/s	32_69	493	5.9	25.1	1.75247e+17	6.18868	1.48549e+13	0.360498	409267	0.239892	493.899	16.5055	-36.8779	1.45793	18	no
LBT-2mm/s	32_70	493	5.1	18.7	1.30562e+17	6.09809	1.372e+13	0.375773	384984	0.174495	493.891	16.508	-36.8779	1.45783	23	no
LBT-2mm/s	32_71	493	4.3	12.3	8.58778e+16	5.97081	1.22527e+13	0.398849	352841	0.106548	493.858	16.5097	-36.8778	1.45771	25	no
LBT-2mm/s	32_72	493	4.7	13.6	9.49543e+16	6.00149	1.25896e+13	0.393166	360307	0.140754	493.834	16.508	-36.8778	1.45757	23	no
LBT-2mm/s	32_73	493	5.1	14.8	1.03333e+17	6.02719	1.28803e+13	0.388457	366706	0.174495	493.826	16.5051	-36.8777	1.45743	18	no
LBT-2mm/s	32_74	493	15.6	62.3	4.34975e+17	6.47653	1.89875e+13	0.31774	494199	0.753085	493.826	16.5033	-36.8777	1.45736	15	no
LBT-2mm/s	32_75	493	26.1	109.7	7.65918e+17	6.66236	2.21214e+13	0.294147	555637	0.935394	493.826	16.5024	-36.8777	1.45732	10	no
LBT-2mm/s	33_21	493	25.9	115.9	8.09206e+17	6.6807	2.24522e+13	0.291966	561997	0.933673	493.741	16.5151	-36.8295	1.32475	10	no
LBT-2mm/s	33_22	493	15.5	65.6	4.58015e+17	6.49326	1.9254e+13	0.315498	499512	0.750028	493.747	16.5152	-36.8296	1.32484	15	no
LBT-2mm/s	33_23	493	5.1	15.2	1.06125e+17	6.03523	1.29734e+13	0.386985	368746	0.174495	493.754	16.5156	-36.8296	1.32496	18	no
LBT-2mm/s	33_24	493	4.7	14	9.77471e+16	6.01019	1.26885e+13	0.391544	362487	0.140754	493.758	16.5175	-36.8296	1.32503	23	no
LBT-2mm/s	33_25	493	4.3	12.7	8.86706e+16	5.98037	1.2359e+13	0.397029	355200	0.106548	493.765	16.5225	-36.8297	1.32519	25	no
LBT-2mm/s	33_26	493	5.2	20	1.39639e+17	6.11866	1.39712e+13	0.372219	390401	0.182834	493.787	16.5232	-36.8297	1.32531	23	no
LBT-2mm/s	33_27	493	6.1	27.3	1.90607e+17	6.21475	1.51957e+13	0.356273	416470	0.255729	493.81	16.5212	-36.8297	1.32535	18	no
LBT-2mm/s	33_28	493	11.5	69.5	4.85244e+17	6.51204	1.95566e+13	0.31301	505525	0.595032	493.818	16.5194	-36.8297	1.32533	15	no
LBT-2mm/s	33_29	493	16.9	111.7	7.79882e+17	6.66838	2.22296e+13	0.293428	557719	0.789786	493.821	16.5183	-36.8297	1.32533	10	no
LBT-2mm/s	33_67	493	16.9	111.7	7.79882e+17	6.66838	2.22296e+13	0.293428	557719	0.789786	493.889	16.5009	-36.8788	1.46027	10	no
LBT-2mm/s	33_68	493	11.5	69.5	4.85244e+17	6.51204	1.95566e+13	0.31301	505525	0.595032	493.891	16.5012	-36.8787	1.46008	15	no
LBT-2mm/s	33_69	493	6.1	27.3	1.90607e+17	6.21475	1.51957e+13	0.356273	416470	0.255729	493.89	16.502	-36.8786	1.45981	18	no
LBT-2mm/s	33_70	493	5.2	20	1.39639e+17	6.11866	1.39712e+13	0.372219	390401	0.182834	493.882	16.503	-36.8786	1.45971	23	no
LBT-2mm/s	33_71	493	4.3	12.7	8.86706e+16	5.98037	1.2359e+13	0.397029	355200	0.106548	493.847	16.5071	-36.8785	1.4596	25	no
LBT-2mm/s	33_72	493	4.7	14	9.77471e+16	6.01019	1.26885e+13	0.391544	362487	0.140754	493.821	16.5078	-36.8785	1.45947	23	no
LBT-2mm/s	33_73	493	5.1	15.2	1.06125e+17	6.03523	1.29734e+13	0.386985	368746	0.174495	493.811	16.5039	-36.8784	1.45933	18	no
LBT-2mm/s	33_74	493	15.5	65.6	4.58015e+17	6.49326	1.9254e+13	0.315498	499512	0.750028	493.808	16.5015	-36.8784	1.45926	15	no
LBT-2mm/s	33_75	493	25.9	115.9	8.09206e+17	6.6807	2.24522e+13	0.291966	561997	0.933673	493.807	16.5006	-36.8784	1.45922	10	no
LBT-2mm/s	34_21	493	26.1	121.6	8.49003e+17	6.69675	2.27451e+13	0.290077	567609	0.935394	493.691	16.5101	-36.8309	1.32868	10	no
LBT-2mm/s	34_22	493	15.7	68.2	4.76168e+17	6.50589	1.94571e+13	0.313821	503551	0.756108	493.697	16.5101	-36.831	1.32878	15	no
LBT-2mm/s	34_23	493	5.2	14.7	1.02634e+17	6.02518	1.28568e+13	0.388832	366190	0.182834	493.705	16.5102	-36.831	1.32891	18	no
LBT-2mm/s	34_24	493	4.8	13.7	9.56525e+16	6.00377	1.26145e+13	0.392755	360858	0.149242	493.708	16.5121	-36.8311	1.32897	23	no
LBT-2mm/s	34_25	493	4.3	12.7	8.86706e+16	5.98037	1.2359e+13	0.397029	355200	0.106548	493.715	16.5187	-36.8311	1.32913	25	no
LBT-2mm/s	34_26	493	5.3	20.8	1.45224e+17	6.1307	1.412e+13	0.370163	393596	0.191129	493.738	16.5188	-36.8312	1.32925	23	no
LBT-2mm/s	34_27	493	6.3	28.8	2.0108e+17	6.2314	1.54167e+13	0.353614	421121	0.271345	493.763	16.5158	-36.8312	1.32929	18	no
LBT-2mm/s	34_28	493	11.1	72.9	5.08983e+17	6.52761	1.98104e+13	0.310971	510551	0.575522	493.771	16.5137	-36.8312	1.32926	15	no
LBT-2mm/s	34_29	493	15.9	116.9	8.16188e+17	6.68357	2.25043e+13	0.291627	562997	0.76205	493.774	16.5125	-36.8312	1.32926	10	no
LBT-2mm/s	34_67	493	15.9	116.9	8.16188e+17	6.68357	2.25043e+13	0.291627	562997	0.76205	493.833	16.4966	-36.8795	1.46227	10	no
LBT-2mm/s	34_68	493	11.1	72.9	5.08983e+17	6.52761	1.98104e+13	0.310971	510551	0.575522	493.834	16.4966	-36.8794	1.46205	15	no
LBT-2mm/s	34_69	493	6.3	28.8	2.0108e+17	6.2314	1.54167e+13	0.353614	421121	0.271345	493.833	16.4974	-36.8793	1.46176	18	no
LBT-2mm/s	34_70	493	5.3	20.8	1.45224e+17	6.1307	1.412e+13	0.370163	393596	0.191129	493.823	16.5	-36.8793	1.46166	23	no
LBT-2mm/s	34_71	493	4.3	12.7	8.86706e+16	5.98037	1.2359e+13	0.397029	355200	0.106548	493.787	16.5044	-36.8793	1.46157	25	no
LBT-2mm/s	34_72	493	4.8	13.7	9.56525e+16	6.00377	1.26145e+13	0.392755	360858	0.149242	493.762	16.5048	-36.8792	1.46143	23	no
LBT-2mm/s	34_73	493	5.2	14.7	1.02634e+17	6.02518	1.28568e+13	0.388832	366190	0.182834	493.752	16.5022	-36.8792	1.4613	18	no
LBT-2mm/s	34_74	493	15.7	68.2	4.76168e+17	6.50589	1.94571e+13	0.313821	503551	0.756108	493.75	16.5002	-36.8791	1.46124	15	no
LBT-2mm/s	34_75	493	26.1	121.6	8.49003e+17	6.69675	2.27451e+13	0.290077	567609	0.935394	493.749	16.4991	-36.8791	1.4612	10	no
LBT-2mm/s	35_21	493	26.7	115.6	8.07112e+17	6.67983	2.24365e+13	0.292068	561695	0.940303	493.599	16.5066	-36.8325	1.33282	10	no
LBT-2mm/s	35_22	493	16.3	67.2	4.69186e+17	6.50109	1.93797e+13	0.314457	502012	0.773531	493.605	16.5068	-36.8325	1.33294	15	no
LBT-2mm/s	35_23	493	5.9	18.8	1.3126e+17	6.09989	1.37398e+13	0.375489	385414	0.239892	493.612	16.5079	-36.8325	1.33306	18	no
LBT-2mm/s	35_24	493	5.1	15.7	1.09616e+17	6.045	1.30873e+13	0.385208	371237	0.174495	493.614	16.5099	-36.8326	1.33311	23	no
LBT-2mm/s	35_25	493	4.3	12.6	8.79724e+16	5.97801	1.23327e+13	0.397477	354616	0.106548	493.624	16.5117	-36.8326	1.33326	25	no
LBT-2mm/s	35_26	493	5.4	21.5	1.50112e+17	6.14088	1.42467e+13	0.368439	396313	0.199379	493.647	16.512	-36.8327	1.33339	23	no
LBT-2mm/s	35_27	493	6.5	30.3	2.11553e+17	6.24725	1.56295e+13	0.351111	425583	0.286734	493.675	16.5108	-36.8327	1.33344	18	no
LBT-2mm/s	35_28	493	12.2	76.2	5.32023e+17	6.54207	2.00486e+13	0.309094	515255	0.627257	493.685	16.5094	-36.8327	1.33339	15	no
LBT-2mm/s	35_29	493	17.9	122.1	8.52494e+17	6.69813	2.27703e+13	0.289917	568092	0.81447	493.689	16.5085	-36.8327	1.33339	10	no
LBT-2mm/s	35_67	493	17.9	122.1	8.52494e+17	6.69813	2.27703e+13	0.289917	568092	0.81447	493.726	16.4964	-36.8803	1.46444	10	no
LBT-2mm/s	35_68	493	12.2	76.2	5.32023e+17	6.54207	2.00486e+13	0.309094	515255	0.627257	493.728	16.4965	-36.8802	1.46419	15	no
LBT-2mm/s	35_69	493	6.5	30.3	2.11553e+17	6.24725	1.56295e+13	0.351111	425583	0.286734	493.728	16.4974	-36.8801	1.46387	18	no
LBT-2mm/s	35_70	493	5.4	21.5	1.50112e+17	6.14088	1.42467e+13	0.368439	396313	0.199379	493.719	16.4996	-36.88	1.46376	23	no
LBT-2mm/s	35_71	493	4.3	12.6	8.79724e+16	5.97801	1.23327e+13	0.397477	354616	0.106548	493.681	16.5039	-36.88	1.46367	25	no
LBT-2mm/s	35_72	493	5.1	15.7	1.09616e+17	6.045	1.30873e+13	0.385208	371237	0.174495	493.654	16.5039	-36.88	1.46353	23	no
LBT-2mm/s	35_73	493	5.9	18.8	1.3126e+17	6.09989	1.37398e+13	0.375489	385414	0.239892	493.645	16.4999	-36.8799	1.46341	18	no
LBT-2mm/s	35_74	493	16.3	67.2	4.69186e+17	6.50109	1.93797e+13	0.314457	502012	0.773531	493.644	16.4977	-36.8799	1.46335	15	no
LBT-2mm/s	35_75	493	26.7	115.6	8.07112e+17	6.67983	2.24365e+13	0.292068	561695	0.940303	493.643	16.4968	-36.8799	1.46333	10	no
LBT-2mm/s	36_21	493	24.7	120.3	8.39927e+17	6.69316	2.26792e+13	0.290499	566348	0.922381	493.454	16.5087	-36.834	1.33699	10	no
LBT-2mm/s	36_22	493	15	67.6	4.71979e+17	6.50302	1.94107e+13	0.314201	502630	0.734208	493.461	16.5088	-36.834	1.33713	15	no
LBT-2mm/s	36_23	493	5.2	14.8	1.03333e+17	6.02723	1.28803e+13	0.388457	366707	0.182834	493.468	16.5097	-36.8341	1.33726	18	no
LBT-2mm/s	36_24	493	4.8	13.7	9.56525e+16	6.00377	1.26145e+13	0.392755	360858	0.149242	493.47	16.5115	-36.8341	1.3373	23	no
LBT-2mm/s	36_25	493	4.3	12.6	8.79724e+16	5.97801	1.23327e+13	0.397477	354616	0.106548	493.478	16.5136	-36.8341	1.33744	25	no
LBT-2mm/s	36_26	493	5.1	18.7	1.30562e+17	6.09809	1.372e+13	0.375773	384984	0.174495	493.503	16.5137	-36.8342	1.33756	23	no
LBT-2mm/s	36_27	493	5.9	24.7	1.72454e+17	6.18371	1.47906e+13	0.361313	407904	0.239892	493.531	16.5124	-36.8342	1.33758	18	no
LBT-2mm/s	36_28	493	11.5	70.7	4.93623e+17	6.51761	1.96472e+13	0.312278	507320	0.595032	493.544	16.5112	-36.8342	1.33754	15	no
LBT-2mm/s	36_29	493	17.1	116.6	8.14094e+17	6.68271	2.24887e+13	0.291728	562698	0.794957	493.549	16.5104	-36.8342	1.33754	10	no
LBT-2mm/s	36_67	493	17.1	116.6	8.14094e+17	6.68271	2.24887e+13	0.291728	562698	0.794957	493.572	16.4996	-36.8811	1.46666	10	no
LBT-2mm/s	36_68	493	11.5	70.7	4.93623e+17	6.51761	1.96472e+13	0.312278	507320	0.595032	493.574	16.4995	-36.881	1.46638	15	no
LBT-2mm/s	36_69	493	5.9	24.7	1.72454e+17	6.18371	1.47906e+13	0.361313	407904	0.239892	493.576	16.5002	-36.8809	1.46602	18	no
LBT-2mm/s	36_70	493	5.1	18.7	1.30562e+17	6.09809	1.372e+13	0.375773	384984	0.174495	493.568	16.5024	-36.8808	1.46592	23	no
LBT-2mm/s	36_71	493	4.3	12.6	8.79724e+16	5.97801	1.23327e+13	0.397477	354616	0.106548	493.53	16.5078	-36.8808	1.46584	25	no
LBT-2mm/s	36_72	493	4.8	13.7	9.56525e+16	6.00377	1.26145e+13	0.392755	360858	0.149242	493.503	16.5083	-36.8808	1.4657	23	no
LBT-2mm/s	36_73	493	5.2	14.8	1.03333e+17	6.02723	1.28803e+13	0.388457	366707	0.182834	493.493	16.504	-36.8807	1.46558	18	no
LBT-2mm/s	36_74	493	15	67.6	4.71979e+17	6.50302	1.94107e+13	0.314201	502630	0.734208	493.491	16.5015	-36.8807	1.46553	15	no
LBT-2mm/s	36_75	493	24.7	120.3	8.39927e+17	6.69316	2.26792e+13	0.290499	566348	0.922381	493.491	16.5006	-36.8807	1.46551	10	no
LBT-2mm/s	37_21	493	24.9	117.9	8.2317e+17	6.68642	2.25562e+13	0.291291	563991	0.924384	493.249	16.5216	-36.8355	1.3413	10	no
LBT-2mm/s	37_22	493	15	66.6	4.64997e+17	6.49818	1.93328e+13	0.314844	501080	0.734208	493.256	16.5212	-36.8356	1.34146	15	no
LBT-2mm/s	37_23	493	5.1	15.2	1.06125e+17	6.03523	1.29734e+13	0.386985	368746	0.174495	493.264	16.5201	-36.8356	1.34159	18	no
LBT-2mm/s	37_24	493	4.8	13.8	9.63507e+16	6.00596	1.26393e+13	0.392348	361404	0.149242	493.266	16.5205	-36.8356	1.3416	23	no
LBT-2mm/s	37_25	493	4.4	12.4	8.6576e+16	5.97342	1.22795e+13	0.398388	353439	0.115129	493.275	16.5251	-36.8357	1.34173	25	no
LBT-2mm/s	37_26	493	5.3	19.4	1.3545e+17	6.10938	1.38568e+13	0.373824	387938	0.191129	493.3	16.5241	-36.8357	1.34186	23	no
LBT-2mm/s	37_27	493	6.1	26.3	1.83625e+17	6.20316	1.50433e+13	0.358142	413255	0.255729	493.329	16.5207	-36.8357	1.34186	18	no
LBT-2mm/s	37_28	493	11.3	66.1	4.61506e+17	6.49573	1.92935e+13	0.315169	500299	0.585379	493.34	16.5189	-36.8357	1.34181	15	no
LBT-2mm/s	37_29	493	16.4	105.9	7.39387e+17	6.65063	2.19118e+13	0.295555	551596	0.776319	493.344	16.518	-36.8357	1.3418	10	no
LBT-2mm/s	37_67	493	16.4	105.9	7.39387e+17	6.65063	2.19118e+13	0.295555	551596	0.776319	493.363	16.5087	-36.882	1.46901	10	no
LBT-2mm/s	37_68	493	11.3	66.1	4.61506e+17	6.49573	1.92935e+13	0.315169	500299	0.585379	493.365	16.5087	-36.8818	1.46869	15	no
LBT-2mm/s	37_69	493	6.1	26.3	1.83625e+17	6.20316	1.50433e+13	0.358142	413255	0.255729	493.367	16.5091	-36.8817	1.46827	18	no
LBT-2mm/s	37_70	493	5.3	19.4	1.3545e+17	6.10938	1.38568e+13	0.373824	387938	0.191129	493.361	16.5107	-36.8817	1.46817	23	no
LBT-2mm/s	37_71	493	4.4	12.4	8.6576e+16	5.97342	1.22795e+13	0.398388	353439	0.115129	493.328	16.5152	-36.8816	1.46811	25	no
LBT-2mm/s	37_72	493	4.8	13.8	9.63507e+16	6.00596	1.26393e+13	0.392348	361404	0.149242	493.302	16.516	-36.8816	1.46797	23	no
LBT-2mm/s	37_73	493	5.1	15.2	1.06125e+17	6.03523	1.29734e+13	0.386985	368746	0.174495	493.292	16.5127	-36.8815	1.46785	18	no
LBT-2mm/s	37_74	493	15	66.6	4.64997e+17	6.49818	1.93328e+13	0.314844	501080	0.734208	493.29	16.5104	-36.8815	1.46781	15	no
LBT-2mm/s	37_75	493	24.9	117.9	8.2317e+17	6.68642	2.25562e+13	0.291291	563991	0.924384	493.29	16.5093	-36.8815	1.4678	10	no
LBT-2mm/s	38_21	492	26.5	114.6	8.39212e+17	6.69287	2.2674e+13	0.290532	566248	0.938708	492.986	16.5353	-36.8372	1.34579	10	no
LBT-2mm/s	38_22	492	15.9	64.9	4.7526e+17	6.50527	1.94471e+13	0.313903	503352	0.76205	492.994	16.5349	-36.8372	1.34597	15	no
LBT-2mm/s	38_23	492	5.2	15.1	1.10577e+17	6.04768	1.31181e+13	0.384731	371912	0.182834	493.002	16.5341	-36.8373	1.34612	18	no
LBT-2mm/s	38_24	492	4.8	13.7	1.00325e+17	6.01811	1.2778e+13	0.390094	364457	0.149242	493.004	16.5348	-36.8373	1.34611	23	no
LBT-2mm/s	38_25	492	4.3	12.2	8.93402e+16	5.98262	1.23841e+13	0.396602	355757	0.106548	493.012	16.5383	-36.8373	1.34625	25	no
LBT-2mm/s	38_26	492	5	17.1	1.25223e+17	6.08532	1.35662e+13	0.378001	381656	0.166115	493.036	16.538	-36.8374	1.34638	23	no
LBT-2mm/s	38_27	492	5.7	21.9	1.60373e+17	6.16128	1.45033e+13	0.365022	401796	0.22384	493.066	16.5354	-36.8374	1.34639	18	no
LBT-2mm/s	38_28	492	11.3	67.2	4.92103e+17	6.51661	1.96308e+13	0.312409	506997	0.585379	493.078	16.5337	-36.8374	1.34631	15	no
LBT-2mm/s	38_29	492	16.8	112.4	8.23101e+17	6.68639	2.25556e+13	0.291295	563981	0.787155	493.083	16.5327	-36.8374	1.3463	10	no
LBT-2mm/s	38_67	492	16.8	112.4	8.23101e+17	6.68639	2.25556e+13	0.291295	563981	0.787155	493.102	16.5235	-36.8829	1.47153	10	no
LBT-2mm/s	38_68	492	11.3	67.2	4.92103e+17	6.51661	1.96308e+13	0.312409	506997	0.585379	493.106	16.5237	-36.8827	1.47115	15	no
LBT-2mm/s	38_69	492	5.7	21.9	1.60373e+17	6.16128	1.45033e+13	0.365022	401796	0.22384	493.11	16.5248	-36.8826	1.47066	18	no
LBT-2mm/s	38_70	492	5	17.1	1.25223e+17	6.08532	1.35662e+13	0.378001	381656	0.166115	493.104	16.527	-36.8825	1.47056	23	no
LBT-2mm/s	38_71	492	4.3	12.2	8.93402e+16	5.98262	1.23841e+13	0.396602	355757	0.106548	493.069	16.5314	-36.8825	1.47054	25	no
LBT-2mm/s	38_72	492	4.8	13.7	1.00325e+17	6.01811	1.2778e+13	0.390094	364457	0.149242	493.042	16.5321	-36.8825	1.47039	23	no
LBT-2mm/s	38_73	492	5.2	15.1	1.10577e+17	6.04768	1.31181e+13	0.384731	371912	0.182834	493.032	16.5293	-36.8824	1.47028	18	no
LBT-2mm/s	38_74	492	15.9	64.9	4.7526e+17	6.50527	1.94471e+13	0.313903	503352	0.76205	493.031	16.528	-36.8824	1.47025	15	no
LBT-2mm/s	38_75	492	26.5	114.6	8.39212e+17	6.69287	2.2674e+13	0.290532	566248	0.938708	493.03	16.5277	-36.8824	1.47025	10	no
LBT-2mm/s	39_21	492	24.5	124.2	9.09512e+17	6.71985	2.31719e+13	0.287394	575755	0.920328	492.661	16.5581	-36.8388	1.35031	10	no
LBT-2mm/s	39_22	492	14.9	70	5.12607e+17	6.52992	1.98484e+13	0.310669	511302	0.730935	492.67	16.558	-36.8389	1.35051	15	no
LBT-2mm/s	39_23	492	5.3	15.7	1.14971e+17	6.05951	1.32569e+13	0.382608	374939	0.191129	492.679	16.5577	-36.8389	1.35067	18	no
LBT-2mm/s	39_24	492	4.8	14.2	1.03986e+17	6.0289	1.29023e+13	0.388108	367185	0.149242	492.68	16.558	-36.8389	1.35065	23	no
LBT-2mm/s	39_25	492	4.3	12.7	9.30016e+16	5.99465	1.25192e+13	0.394333	358744	0.106548	492.689	16.5599	-36.839	1.35079	25	no
LBT-2mm/s	39_26	492	5.4	21.6	1.58176e+17	6.15697	1.44494e+13	0.365732	400645	0.199379	492.715	16.5608	-36.839	1.35093	23	no
LBT-2mm/s	39_27	492	6.5	30.5	2.2335e+17	6.26422	1.58602e+13	0.348459	430403	0.286734	492.744	16.5592	-36.839	1.35093	18	no
LBT-2mm/s	39_28	492	11.5	65.1	4.76725e+17	6.50627	1.94632e+13	0.313771	503673	0.595032	492.757	16.5566	-36.839	1.35082	15	no
LBT-2mm/s	39_29	492	16.5	99.7	7.30099e+17	6.64642	2.18372e+13	0.296062	550155	0.779075	492.762	16.5548	-36.839	1.3508	10	no
LBT-2mm/s	39_67	492	16.5	99.7	7.30099e+17	6.64642	2.18372e+13	0.296062	550155	0.779075	492.786	16.5416	-36.8838	1.4741	10	no
LBT-2mm/s	39_68	492	11.5	65.1	4.76725e+17	6.50627	1.94632e+13	0.313771	503673	0.595032	492.791	16.5419	-36.8836	1.47365	15	no
LBT-2mm/s	39_69	492	6.5	30.5	2.2335e+17	6.26422	1.58602e+13	0.348459	430403	0.286734	492.797	16.5436	-36.8834	1.47309	18	no
LBT-2mm/s	39_70	492	5.4	21.6	1.58176e+17	6.15697	1.44494e+13	0.365732	400645	0.199379	492.789	16.5474	-36.8834	1.47299	23	no
LBT-2mm/s	39_71	492	4.3	12.7	9.30016e+16	5.99465	1.25192e+13	0.394333	358744	0.106548	492.753	16.5525	-36.8834	1.473	25	no
LBT-2mm/s	39_72	492	4.8	14.2	1.03986e+17	6.0289	1.29023e+13	0.388108	367185	0.149242	492.727	16.5528	-36.8834	1.47285	23	no
LBT-2mm/s	39_73	492	5.3	15.7	1.14971e+17	6.05951	1.32569e+13	0.382608	374939	0.191129	492.719	16.5497	-36.8833	1.47274	18	no
LBT-2mm/s	39_74	492	14.9	70	5.12607e+17	6.52992	1.98484e+13	0.310669	511302	0.730935	492.718	16.5483	-36.8833	1.47272	15	no
LBT-2mm/s	39_75	492	24.5	124.2	9.09512e+17	6.71985	2.31719e+13	0.287394	575755	0.920328	492.718	16.5479	-36.8833	1.47272	10	no
LBT-2mm/s	40_21	492	26.1	114.3	8.37015e+17	6.69199	2.2658e+13	0.290635	565941	0.935394	492.276	16.5854	-36.8405	1.35494	10	no
LBT-2mm/s	40_22	492	15.7	65.4	4.78922e+17	6.50777	1.94874e+13	0.313573	504153	0.756108	492.286	16.5858	-36.8406	1.35517	15	no
LBT-2mm/s	40_23	492	5.3	16.5	1.20829e+17	6.07459	1.3436e+13	0.379919	378834	0.191129	492.294	16.5881	-36.8406	1.35534	18	no
LBT-2mm/s	40_24	492	4.9	14.8	1.0838e+17	6.04147	1.30473e+13	0.38583	370361	0.157697	492.293	16.5923	-36.8406	1.35533	23	no
LBT-2mm/s	40_25	492	4.4	13.1	9.59308e+16	6.00415	1.26244e+13	0.392593	361069	0.115129	492.301	16.5978	-36.8407	1.35546	25	no
LBT-2mm/s	40_26	492	5.8	22.4	1.64034e+17	6.16825	1.4592e+13	0.363864	403685	0.231892	492.329	16.5947	-36.8407	1.3556	23	no
LBT-2mm/s	40_27	492	7.1	31.6	2.31406e+17	6.27534	1.60127e+13	0.346741	433579	0.331496	492.36	16.5888	-36.8407	1.35554	18	no
LBT-2mm/s	40_28	492	11.9	72.7	5.32379e+17	6.54229	2.00522e+13	0.309066	515326	0.613739	492.371	16.585	-36.8407	1.35542	15	no
LBT-2mm/s	40_29	492	16.7	113.8	8.33353e+17	6.69053	2.26312e+13	0.290808	565428	0.784493	492.375	16.5827	-36.8407	1.35539	10	no
LBT-2mm/s	40_67	492	16.7	113.8	8.33353e+17	6.69053	2.26312e+13	0.290808	565428	0.784493	492.397	16.5686	-36.8848	1.4768	10	no
LBT-2mm/s	40_68	492	11.9	72.7	5.32379e+17	6.54229	2.00522e+13	0.309066	515326	0.613739	492.402	16.5697	-36.8846	1.47628	15	no
LBT-2mm/s	40_69	492	7.1	31.6	2.31406e+17	6.27534	1.60127e+13	0.346741	433579	0.331496	492.407	16.5727	-36.8844	1.47562	18	no
LBT-2mm/s	40_70	492	5.8	22.4	1.64034e+17	6.16825	1.4592e+13	0.363864	403685	0.231892	492.4	16.5772	-36.8843	1.47553	23	no
LBT-2mm/s	40_71	492	4.4	13.1	9.59308e+16	6.00415	1.26244e+13	0.392593	361069	0.115129	492.363	16.5805	-36.8843	1.47556	25	no
LBT-2mm/s	40_72	492	4.9	14.8	1.0838e+17	6.04147	1.30473e+13	0.38583	370361	0.157697	492.339	16.5799	-36.8843	1.47541	23	no
LBT-2mm/s	40_73	492	5.3	16.5	1.20829e+17	6.07459	1.3436e+13	0.379919	378834	0.191129	492.331	16.5789	-36.8842	1.47528	18	no
LBT-2mm/s	40_74	492	15.7	65.4	4.78922e+17	6.50777	1.94874e+13	0.313573	504153	0.756108	492.33	16.5783	-36.8842	1.47527	15	no
LBT-2mm/s	40_75	492	26.1	114.3	8.37015e+17	6.69199	2.2658e+13	0.290635	565941	0.935394	492.331	16.5781	-36.8842	1.47528	10	no
LBT-2mm/s	41_21	491	26.1	111.4	8.55731e+17	6.6994	2.27937e+13	0.289768	568538	0.935394	491.797	16.6313	-36.8423	1.35989	10	no
LBT-2mm/s	41_22	491	15.7	63.5	4.87782e+17	6.51374	1.95841e+13	0.312787	506071	0.756108	491.808	16.6311	-36.8424	1.36013	15	no
LBT-2mm/s	41_23	491	5.3	15.6	1.19833e+17	6.07207	1.3406e+13	0.380365	378183	0.191129	491.814	16.6302	-36.8424	1.36031	18	no
LBT-2mm/s	41_24	491	4.9	14.5	1.11383e+17	6.04973	1.31439e+13	0.384334	372473	0.157697	491.812	16.6302	-36.8424	1.36027	23	no
LBT-2mm/s	41_25	491	4.4	13.4	1.02934e+17	6.02534	1.28669e+13	0.388671	366402	0.115129	491.828	16.6316	-36.8425	1.36042	25	no
LBT-2mm/s	41_26	491	4.9	17.7	1.35964e+17	6.11035	1.3871e+13	0.373624	388241	0.157697	491.856	16.6285	-36.8425	1.36058	23	no
LBT-2mm/s	41_27	491	5.4	21.9	1.68227e+17	6.17597	1.46918e+13	0.362575	405806	0.199379	491.883	16.6233	-36.8425	1.3605	18	no
LBT-2mm/s	41_28	491	12.3	68.6	5.26958e+17	6.53895	1.99969e+13	0.309499	514235	0.631668	491.892	16.6205	-36.8425	1.36033	15	no
LBT-2mm/s	41_29	491	19.2	115.2	8.84921e+17	6.71064	2.3001e+13	0.288459	572498	0.842493	491.894	16.6189	-36.8424	1.36029	10	no
LBT-2mm/s	41_67	491	19.2	115.2	8.84921e+17	6.71064	2.3001e+13	0.288459	572498	0.842493	491.918	16.6005	-36.8859	1.47975	10	no
LBT-2mm/s	41_68	491	12.3	68.6	5.26958e+17	6.53895	1.99969e+13	0.309499	514235	0.631668	491.925	16.6022	-36.8856	1.4791	15	no
LBT-2mm/s	41_69	491	5.4	21.9	1.68227e+17	6.17597	1.46918e+13	0.362575	405806	0.199379	491.931	16.6061	-36.8853	1.47832	18	no
LBT-2mm/s	41_70	491	4.9	17.7	1.35964e+17	6.11035	1.3871e+13	0.373624	388241	0.157697	491.921	16.6102	-36.8853	1.47823	23	no
LBT-2mm/s	41_71	491	4.4	13.4	1.02934e+17	6.02534	1.28669e+13	0.388671	366402	0.115129	491.879	16.6141	-36.8853	1.47832	25	no
LBT-2mm/s	41_72	491	4.9	14.5	1.11383e+17	6.04973	1.31439e+13	0.384334	372473	0.157697	491.854	16.6158	-36.8853	1.47816	23	no
LBT-2mm/s	41_73	491	5.3	15.6	1.19833e+17	6.07207	1.3406e+13	0.380365	378183	0.191129	491.846	16.6178	-36.8852	1.47804	18	no
LBT-2mm/s	41_74	491	15.7	63.5	4.87782e+17	6.51374	1.95841e+13	0.312787	506071	0.756108	491.847	16.6185	-36.8852	1.47801	15	no
LBT-2mm/s	41_75	491	26.1	111.4	8.55731e+17	6.6994	2.27937e+13	0.289768	568538	0.935394	491.848	16.6185	-36.8852	1.47804	10	no
LBT-2mm/s	42_21	490	25.5	110.3	8.88889e+17	6.71214	2.30288e+13	0.288285	573029	0.930097	491.227	16.6909	-36.8441	1.3649	10	no
LBT-2mm/s	42_22	490	15.5	63	5.07706e+17	6.52679	1.9797e+13	0.311078	510285	0.750028	491.239	16.6906	-36.8442	1.36516	15	no
LBT-2mm/s	42_23	490	5.4	15.6	1.25718e+17	6.08667	1.35806e+13	0.37779	381972	0.199379	491.251	16.688	-36.8443	1.36537	18	no
LBT-2mm/s	42_24	490	4.9	14.3	1.15241e+17	6.06004	1.32653e+13	0.38248	375120	0.157697	491.252	16.6829	-36.8443	1.36536	23	no
LBT-2mm/s	42_25	490	4.3	12.9	1.03959e+17	6.02812	1.29014e+13	0.388123	367155	0.106548	491.265	16.6756	-36.8443	1.36554	25	no
LBT-2mm/s	42_26	490	5	19.4	1.56341e+17	6.15323	1.4404e+13	0.366333	399673	0.166115	491.293	16.6695	-36.8444	1.36571	23	no
LBT-2mm/s	42_27	490	5.7	25.9	2.08724e+17	6.24299	1.55728e+13	0.351773	424394	0.22384	491.324	16.6617	-36.8444	1.36561	18	no
LBT-2mm/s	42_28	490	11.6	61.8	4.98036e+17	6.52052	1.96944e+13	0.311897	508257	0.599783	491.334	16.6554	-36.8443	1.36536	15	no
LBT-2mm/s	42_29	490	17.5	97.7	7.87348e+17	6.67156	2.22868e+13	0.29305	558820	0.804943	491.338	16.6513	-36.8443	1.36529	10	no
LBT-2mm/s	42_67	490	17.5	97.7	7.87348e+17	6.67156	2.22868e+13	0.29305	558820	0.804943	491.343	16.6341	-36.887	1.48292	10	no
LBT-2mm/s	42_68	490	11.6	61.8	4.98036e+17	6.52052	1.96944e+13	0.311897	508257	0.599783	491.351	16.6374	-36.8867	1.48211	15	no
LBT-2mm/s	42_69	490	5.7	25.9	2.08724e+17	6.24299	1.55728e+13	0.351773	424394	0.22384	491.36	16.6446	-36.8864	1.48112	18	no
LBT-2mm/s	42_70	490	5	19.4	1.56341e+17	6.15323	1.4404e+13	0.366333	399673	0.166115	491.355	16.6529	-36.8863	1.48104	23	no
LBT-2mm/s	42_71	490	4.3	12.9	1.03959e+17	6.02812	1.29014e+13	0.388123	367155	0.106548	491.318	16.6591	-36.8864	1.4812	25	no
LBT-2mm/s	42_72	490	4.9	14.3	1.15241e+17	6.06004	1.32653e+13	0.38248	375120	0.157697	491.291	16.6615	-36.8863	1.48105	23	no
LBT-2mm/s	42_73	490	5.4	15.6	1.25718e+17	6.08667	1.35806e+13	0.37779	381972	0.199379	491.283	16.664	-36.8863	1.48093	18	no
LBT-2mm/s	42_74	490	15.5	63	5.07706e+17	6.52679	1.9797e+13	0.311078	510285	0.750028	491.282	16.6651	-36.8863	1.48091	15	no
LBT-2mm/s	42_75	490	25.5	110.3	8.88889e+17	6.71214	2.30288e+13	0.288285	573029	0.930097	491.282	16.6654	-36.8863	1.48092	10	no
LBT-2mm/s	43_21	490	25.1	119.4	9.62224e+17	6.7388	2.35271e+13	0.28522	582508	0.926336	490.586	16.754	-36.8461	1.37027	10	no
LBT-2mm/s	43_22	490	15.3	67.9	5.47194e+17	6.55128	2.02014e+13	0.30791	518264	0.743808	490.6	16.7543	-36.8462	1.37053	15	no
LBT-2mm/s	43_23	490	5.4	16.3	1.31359e+17	6.10005	1.37425e+13	0.375449	385473	0.199379	490.61	16.7525	-36.8462	1.37076	18	no
LBT-2mm/s	43_24	490	4.9	14.9	1.20077e+17	6.0725	1.34133e+13	0.380256	378340	0.157697	490.607	16.7446	-36.8463	1.37079	23	no
LBT-2mm/s	43_25	490	4.3	13.5	1.08794e+17	6.04184	1.30607e+13	0.385621	370644	0.106548	490.62	16.7254	-36.8463	1.37104	25	no
LBT-2mm/s	43_26	490	4.7	17.1	1.37806e+17	6.1143	1.39215e+13	0.372914	389326	0.140754	490.647	16.7124	-36.8464	1.37124	23	no
LBT-2mm/s	43_27	490	5.1	20.6	1.66012e+17	6.17177	1.46393e+13	0.363251	404688	0.174495	490.677	16.7004	-36.8464	1.37113	18	no
LBT-2mm/s	43_28	490	9.4	67.6	5.44777e+17	6.54983	2.01772e+13	0.308096	517789	0.483092	490.691	16.6947	-36.8463	1.37081	15	no
LBT-2mm/s	43_29	490	13.6	114.5	9.22736e+17	6.7247	2.32624e+13	0.286835	577478	0.684859	490.695	16.691	-36.8462	1.37072	10	no
LBT-2mm/s	43_67	490	13.6	114.5	9.22736e+17	6.7247	2.32624e+13	0.286835	577478	0.684859	490.701	16.6655	-36.8883	1.48653	10	no
LBT-2mm/s	43_68	490	9.4	67.6	5.44777e+17	6.54983	2.01772e+13	0.308096	517789	0.483092	490.711	16.6705	-36.8879	1.4855	15	no
LBT-2mm/s	43_69	490	5.1	20.6	1.66012e+17	6.17177	1.46393e+13	0.363251	404688	0.174495	490.72	16.6812	-36.8875	1.48423	18	no
LBT-2mm/s	43_70	490	4.7	17.1	1.37806e+17	6.1143	1.39215e+13	0.372914	389326	0.140754	490.709	16.691	-36.8874	1.48406	23	no
LBT-2mm/s	43_71	490	4.3	13.5	1.08794e+17	6.04184	1.30607e+13	0.385621	370644	0.106548	490.674	16.6977	-36.8875	1.48429	25	no
LBT-2mm/s	43_72	490	4.9	14.9	1.20077e+17	6.0725	1.34133e+13	0.380256	378340	0.157697	490.652	16.7045	-36.8875	1.48417	23	no
LBT-2mm/s	43_73	490	5.4	16.3	1.31359e+17	6.10005	1.37425e+13	0.375449	385473	0.199379	490.64	16.7193	-36.8874	1.48406	18	no
LBT-2mm/s	43_74	490	15.3	67.9	5.47194e+17	6.55128	2.02014e+13	0.30791	518264	0.743808	490.636	16.7269	-36.8874	1.48405	15	no
LBT-2mm/s	43_75	490	25.1	119.4	9.62224e+17	6.7388	2.35271e+13	0.28522	582508	0.926336	490.635	16.73	-36.8874	1.48405	10	no
LBT-2mm/s	44_21	489	22.5	120.1	1.01552e+18	6.75699	2.3872e+13	0.283158	589044	0.896709	489.835	16.8712	-36.8483	1.37641	10	no
LBT-2mm/s	44_22	489	13.9	67.9	5.74138e+17	6.56704	2.04653e+13	0.305897	523449	0.696093	489.85	16.8725	-36.8484	1.37665	15	no
LBT-2mm/s	44_23	489	5.2	15.7	1.32753e+17	6.10321	1.37818e+13	0.374889	386319	0.182834	489.85	16.8654	-36.8485	1.3769	19	no
LBT-2mm/s	44_24	489	4.7	14.3	1.20916e+17	6.07445	1.34386e+13	0.379881	378886	0.140754	489.84	16.8341	-36.8485	1.37701	23	no
LBT-2mm/s	44_25	489	4.2	12.9	1.09078e+17	6.04238	1.30699e+13	0.385478	370841	0.097957	489.865	16.7831	-36.8486	1.37725	28	no
LBT-2mm/s	44_26	489	4.4	14.9	1.25989e+17	6.08653	1.35885e+13	0.377674	382132	0.115129	489.898	16.7655	-36.8487	1.37744	23	no
LBT-2mm/s	44_27	489	4.6	16.9	1.429e+17	6.12529	1.40586e+13	0.371007	392272	0.132236	489.935	16.7584	-36.8486	1.37725	19	no
LBT-2mm/s	44_28	489	8	66.1	5.58918e+17	6.55822	2.03173e+13	0.30702	520544	0.394591	489.95	16.7535	-36.8485	1.37689	15	no
LBT-2mm/s	44_29	489	11.4	115.3	9.74935e+17	6.74323	2.36106e+13	0.284717	584092	0.590231	489.956	16.7496	-36.8484	1.37678	10	no
LBT-2mm/s	44_67	489	11.4	115.3	9.74935e+17	6.74323	2.36106e+13	0.284717	584092	0.590231	489.942	16.7059	-36.8899	1.49095	10	no
LBT-2mm/s	44_68	489	8	66.1	5.58918e+17	6.55822	2.03173e+13	0.30702	520544	0.394591	489.953	16.7101	-36.8894	1.48952	15	no
LBT-2mm/s	44_69	489	4.6	16.9	1.429e+17	6.12529	1.40586e+13	0.371007	392272	0.132236	489.963	16.7228	-36.8888	1.48783	19	no
LBT-2mm/s	44_70	489	4.4	14.9	1.25989e+17	6.08653	1.35885e+13	0.377674	382132	0.115129	489.952	16.7424	-36.8888	1.48776	23	no
LBT-2mm/s	44_71	489	4.2	12.9	1.09078e+17	6.04238	1.30699e+13	0.385478	370841	0.097957	489.911	16.754	-36.8889	1.48799	28	no
LBT-2mm/s	44_72	489	4.7	14.3	1.20916e+17	6.07445	1.34386e+13	0.379881	378886	0.140754	489.887	16.7612	-36.8888	1.48776	23	no
LBT-2mm/s	44_73	489	5.2	15.7	1.32753e+17	6.10321	1.37818e+13	0.374889	386319	0.182834	489.879	16.7809	-36.8887	1.48763	19	no
LBT-2mm/s	44_74	489	13.9	67.9	5.74138e+17	6.56704	2.04653e+13	0.305897	523449	0.696093	489.881	16.793	-36.8887	1.48759	15	no
LBT-2mm/s	44_75	489	22.5	120.1	1.01552e+18	6.75699	2.3872e+13	0.283158	589044	0.896709	489.883	16.7997	-36.8887	1.48757	10	no
LBT-2mm/s	45_21	488	19.3	118.1	1.04791e+18	6.76761	2.40753e+13	0.281965	592883	0.844474	488.98	16.9265	-36.8508	1.38326	12	no
LBT-2mm/s	45_22	488	12.3	67.5	5.98934e+17	6.58094	2.07002e+13	0.304139	528053	0.631668	489.003	16.9349	-36.8509	1.38344	20	no
LBT-2mm/s	45_23	488	5.2	16.8	1.49068e+17	6.13868	1.42199e+13	0.368801	395738	0.182834	489.021	16.9461	-36.851	1.38385	25	no
LBT-2mm/s	45_24	488	4.7	14.5	1.2866e+17	6.09334	1.36657e+13	0.376554	383808	0.140754	489.018	16.9221	-36.8511	1.38417	28	no
LBT-2mm/s	45_25	488	4.2	12.1	1.07365e+17	6.0376	1.30141e+13	0.386347	369622	0.097957	489.043	16.8863	-36.8512	1.38434	32	no
LBT-2mm/s	45_26	488	4.3	14.6	1.29547e+17	6.09481	1.36911e+13	0.376188	384348	0.106548	489.073	16.8868	-36.8513	1.38467	28	no
LBT-2mm/s	45_27	488	4.4	17.1	1.5173e+17	6.14338	1.4288e+13	0.367882	397186	0.115129	489.109	16.8753	-36.8513	1.38476	25	no
LBT-2mm/s	45_28	488	7.5	74.2	6.58384e+17	6.61215	2.1236e+13	0.300247	538503	0.360142	489.133	16.8628	-36.8512	1.38427	20	no
LBT-2mm/s	45_29	488	10.5	131.3	1.16504e+18	6.80356	2.47739e+13	0.277983	606026	0.544697	489.146	16.8546	-36.851	1.38398	12	no
LBT-2mm/s	45_67	488	10.5	131.3	1.16504e+18	6.80356	2.47739e+13	0.277983	606026	0.544697	489.146	16.8343	-36.8922	1.49716	12	no
LBT-2mm/s	45_68	488	7.5	74.2	6.58384e+17	6.61215	2.1236e+13	0.300247	538503	0.360142	489.163	16.8349	-36.8913	1.49485	20	no
LBT-2mm/s	45_69	488	4.4	17.1	1.5173e+17	6.14338	1.4288e+13	0.367882	397186	0.115129	489.179	16.8381	-36.8903	1.49207	25	no
LBT-2mm/s	45_70	488	4.3	14.6	1.29547e+17	6.09481	1.36911e+13	0.376188	384348	0.106548	489.162	16.8556	-36.8903	1.49193	28	no
LBT-2mm/s	45_71	488	4.2	12.1	1.07365e+17	6.0376	1.30141e+13	0.386347	369622	0.097957	489.101	16.9173	-36.8905	1.49257	32	no
LBT-2mm/s	45_72	488	4.7	14.5	1.2866e+17	6.09334	1.36657e+13	0.376554	383808	0.140754	489.065	16.9175	-36.8905	1.49241	28	no
LBT-2mm/s	45_73	488	5.2	16.8	1.49068e+17	6.13868	1.42199e+13	0.368801	395738	0.182834	489.05	16.9027	-36.8904	1.49222	25	no
LBT-2mm/s	45_74	488	12.3	67.5	5.98934e+17	6.58094	2.07002e+13	0.304139	528053	0.631668	489.051	16.9115	-36.8904	1.49216	20	no
LBT-2mm/s	45_75	488	19.3	118.1	1.04791e+18	6.76761	2.40753e+13	0.281965	592883	0.844474	489.055	16.9264	-36.8904	1.49214	12	no
LBT-2mm/s	46_21	487	18.1	166.3	1.54865e+18	6.90107	2.67528e+13	0.267611	642786	0.819068	488.11	17.1657	-36.8539	1.39187	12	no
LBT-2mm/s	46_22	487	11.5	91.1	8.48356e+17	6.6965	2.27405e+13	0.290107	567520	0.595032	488.144	17.2019	-36.854	1.39201	25	no
LBT-2mm/s	46_23	487	4.9	15.9	1.48067e+17	6.13646	1.4194e+13	0.369152	395182	0.157697	488.153	17.3438	-36.8543	1.39282	30	no
LBT-2mm/s	46_24	487	4.5	13.3	1.23854e+17	6.0815	1.3526e+13	0.37859	380779	0.123693	488.161	17.3687	-36.8546	1.39369	32	no
LBT-2mm/s	46_25	487	4.1	10.6	9.8711e+16	6.01199	1.27222e+13	0.390997	363212	0.0893621	488.204	17.4803	-36.8549	1.39465	35	no
LBT-2mm/s	46_26	487	4.2	13.5	1.25717e+17	6.08543	1.35806e+13	0.37779	381954	0.097957	488.245	17.6088	-36.8552	1.39541	32	no
LBT-2mm/s	46_27	487	4.3	16.3	1.51791e+17	6.14329	1.42896e+13	0.367861	397216	0.106548	488.29	17.5159	-36.8552	1.39534	30	no
LBT-2mm/s	46_28	487	6.6	72.8	6.7794e+17	6.62182	2.14045e+13	0.299055	541776	0.294341	488.313	17.4116	-36.8549	1.39461	25	no
LBT-2mm/s	46_29	487	8.8	129.3	1.20409e+18	6.81478	2.49954e+13	0.276758	610174	0.446582	488.323	17.3539	-36.8548	1.39429	12	no
LBT-2mm/s	46_67	487	8.8	129.3	1.20409e+18	6.81478	2.49954e+13	0.276758	610174	0.446582	488.301	17.3549	-36.8972	1.51091	12	no
LBT-2mm/s	46_68	487	6.6	72.8	6.7794e+17	6.62182	2.14045e+13	0.299055	541776	0.294341	488.324	17.3681	-36.8955	1.50627	25	no
LBT-2mm/s	46_69	487	4.3	16.3	1.51791e+17	6.14329	1.42896e+13	0.367861	397216	0.106548	488.347	17.3614	-36.8933	1.50016	30	no
LBT-2mm/s	46_70	487	4.2	13.5	1.25717e+17	6.08543	1.35806e+13	0.37779	381954	0.097957	488.332	17.3668	-36.8931	1.49959	32	no
LBT-2mm/s	46_71	487	4.1	10.6	9.8711e+16	6.01199	1.27222e+13	0.390997	363212	0.0893621	488.268	17.463	-36.8933	1.5003	35	no
LBT-2mm/s	46_72	487	4.5	13.3	1.23854e+17	6.0815	1.3526e+13	0.37859	380779	0.123693	488.22	17.3865	-36.893	1.49937	32	no
LBT-2mm/s	46_73	487	4.9	15.9	1.48067e+17	6.13646	1.4194e+13	0.369152	395182	0.157697	488.185	17.2771	-36.8929	1.49906	30	no
LBT-2mm/s	46_74	487	11.5	91.1	8.48356e+17	6.6965	2.27405e+13	0.290107	567520	0.595032	488.173	17.2141	-36.8929	1.49903	25	no
LBT-2mm/s	46_75	487	18.1	166.3	1.54865e+18	6.90107	2.67528e+13	0.267611	642786	0.819068	488.172	17.1755	-36.8928	1.49888	12	no
LBT-2mm/s	47_12	485	36.7	156.7	1.60792e+18	6.91404	2.70255e+13	0.266276	647799	0.984462	485.748	16.9829	-36.8345	1.33855	7	no
LBT-2mm/s	47_13	485	35.4	143.1	1.46837e+18	6.88273	2.63711e+13	0.269515	635746	0.981439	485.719	16.9844	-36.8372	1.346	7	no
LBT-2mm/s	47_14	485	32.4	132.6	1.36062e+18	6.85655	2.5834e+13	0.27227	625801	0.972109	485.691	16.9852	-36.84	1.3535	8	no
LBT-2mm/s	47_15	485	29.3	122.1	1.25288e+18	6.82833	2.5265e+13	0.27529	615210	0.957717	485.655	16.9866	-36.8434	1.36293	8	no
LBT-2mm/s	47_16	485	26.5	119.8	1.22928e+18	6.82184	2.51356e+13	0.275991	612794	0.938708	485.626	16.9878	-36.8477	1.37472	8	no
LBT-2mm/s	47_17	485	23.6	117.5	1.20568e+18	6.81523	2.50044e+13	0.276709	610341	0.910423	485.643	16.9861	-36.8519	1.38644	8	no
LBT-2mm/s	47_18	485	19	123.7	1.2693e+18	6.83278	2.53539e+13	0.274811	616869	0.83846	485.721	16.9894	-36.8564	1.39878	8	no
LBT-2mm/s	47_19	485	14.3	129.9	1.33292e+18	6.8495	2.56909e+13	0.273019	623143	0.7105	485.958	17.198	-36.8614	1.41238	10	no
LBT-2mm/s	47_20	486	9.4	185.4	1.81221e+18	6.95552	2.79125e+13	0.262079	664028	0.483092	486.551	18.8742	-36.8605	1.41003	30	no
LBT-2mm/s	47_21	486	4.5	15.8	1.54439e+17	6.14898	1.43565e+13	0.366966	398651	0.123693	486.917	19.1113	-36.8577	1.40228	45	no
LBT-2mm/s	47_22	486	4.2	12	1.17295e+17	6.06436	1.33287e+13	0.381522	376486	0.097957	487.012	18.8895	-36.8581	1.40334	45	no
LBT-2mm/s	47_23	486	3.9	8.1	7.91743e+16	5.94525	1.19867e+13	0.403518	346902	0.0721943	487.113	18.6777	-36.8599	1.40821	45	no
LBT-2mm/s	47_24	487	3.9	8.1	7.54301e+16	5.93087	1.1831e+13	0.406331	343419	0.0721943	487.19	18.6359	-36.8621	1.41444	45	no
LBT-2mm/s	47_25	487	3.8	8.1	7.54301e+16	5.93033	1.1831e+13	0.406331	343412	0.063642	487.296	18.6862	-36.8651	1.42261	45	no
LBT-2mm/s	47_26	487	4	12.9	1.20129e+17	6.07094	1.34149e+13	0.380232	378351	0.0807714	487.357	18.7545	-36.8674	1.42891	45	no
LBT-2mm/s	47_27	487	4.2	17.7	1.64829e+17	6.16841	1.46111e+13	0.363617	404071	0.097957	487.395	18.8502	-36.8704	1.43727	45	no
LBT-2mm/s	47_28	487	4.8	36.8	3.42695e+17	6.39934	1.78036e+13	0.328348	470363	0.149242	487.398	18.9823	-36.8728	1.44381	43	no
LBT-2mm/s	47_29	487	5.3	158.4	1.47508e+18	6.88413	2.64036e+13	0.269351	636343	0.191129	487.391	19.1188	-36.8746	1.44875	40	no
LBT-2mm/s	47_30	487	7.8	245.2	2.28339e+18	7.03636	2.97098e+13	0.254187	696544	0.380993	487.236	17.828	-36.8936	1.501	27	no
LBT-2mm/s	47_31	487	10.2	117.1	1.09048e+18	6.78109	2.43355e+13	0.280461	597788	0.528562	487.263	16.9307	-36.9054	1.53351	25	no
LBT-2mm/s	47_32	487	12.1	112.8	1.05043e+18	6.76842	2.40909e+13	0.281874	593178	0.622799	487.378	16.8857	-36.9142	1.55782	20	no
LBT-2mm/s	47_33	487	13.9	108.5	1.01039e+18	6.75528	2.38394e+13	0.283351	588426	0.696093	487.557	16.9126	-36.9223	1.58009	14	no
LBT-2mm/s	47_34	488	16.5	121.5	1.07808e+18	6.77722	2.42605e+13	0.280892	596376	0.779075	487.79	16.93	-36.9303	1.60189	10	no
LBT-2mm/s	47_35	488	18.8	123.6	1.09672e+18	6.78303	2.4373e+13	0.280246	598494	0.834328	488.045	16.9691	-36.9378	1.62255	9	no
LBT-2mm/s	47_36	488	18.8	121.1	1.07453e+18	6.7761	2.42389e+13	0.281017	595969	0.834328	488.306	17.0256	-36.945	1.64247	9	no
LBT-2mm/s	47_37	488	22.5	109.1	9.68055e+17	6.74084	2.35655e+13	0.284988	583237	0.896709	488.551	17.1234	-36.9521	1.66196	9	no
LBT-2mm/s	47_38	488	23.6	119.2	1.05767e+18	6.77075	2.41356e+13	0.281614	594022	0.910423	488.762	17.2475	-36.9586	1.67997	9	no
LBT-2mm/s	47_39	489	25	127.7	1.07978e+18	6.77775	2.42708e+13	0.280833	596571	0.925366	488.939	17.3662	-36.9647	1.69666	9	no
LBT-2mm/s	47_40	489	26.4	136.2	1.15166e+18	6.79963	2.46968e+13	0.278414	604579	0.937895	489.092	17.4848	-36.97	1.71119	9	no
LBT-2mm/s	47_41	489	27.3	133.3	1.12714e+18	6.79231	2.45537e+13	0.279219	601893	0.944851	489.169	17.5399	-36.973	1.71952	9	no
LBT-2mm/s	47_42	489	28.1	130.3	1.10177e+18	6.78459	2.44032e+13	0.280073	599064	0.950397	489.224	17.5719	-36.9751	1.72535	9	no
LBT-2mm/s	47_43	489	29.7	128.8	1.08909e+18	6.78066	2.43271e+13	0.280509	597631	0.959915	489.279	17.6148	-36.9768	1.73006	9	no
LBT-2mm/s	47_44	489	31.2	127.2	1.07556e+18	6.77642	2.42451e+13	0.280981	596087	0.967215	489.312	17.6491	-36.9778	1.7328	9	no
LBT-2mm/s	47_45	489	30.7	121	1.02313e+18	6.75951	2.39202e+13	0.282874	589954	0.964938	489.328	17.6734	-36.9786	1.73476	9	no
LBT-2mm/s	47_46	489	30.2	114.7	9.69861e+17	6.74147	2.35773e+13	0.284917	583462	0.962508	489.335	17.6891	-36.9791	1.73624	9	no
LBT-2mm/s	47_47	489	29.8	120.9	1.02229e+18	6.75924	2.39148e+13	0.282905	589853	0.960447	489.338	17.6987	-36.9796	1.73761	9	no
LBT-2mm/s	47_48	489	29.3	127.1	1.07471e+18	6.77616	2.424e+13	0.28101	595990	0.957717	489.339	17.7002	-36.98	1.73871	9	no
LBT-2mm/s	47_49	489	29.8	120.9	1.02229e+18	6.75924	2.39148e+13	0.282905	589853	0.960447	489.339	17.6935	-36.9804	1.73978	9	no
LBT-2mm/s	47_50	489	30.2	114.7	9.69861e+17	6.74147	2.35773e+13	0.284917	583462	0.962508	489.336	17.6811	-36.9807	1.74078	9	no
LBT-2mm/s	47_51	489	30.7	121	1.02313e+18	6.75951	2.39202e+13	0.282874	589954	0.964938	489.331	17.6715	-36.981	1.74157	9	no
LBT-2mm/s	47_52	489	31.2	127.2	1.07556e+18	6.77642	2.42451e+13	0.280981	596087	0.967215	489.326	17.6738	-36.9812	1.74196	9	no
LBT-2mm/s	47_53	489	29.7	128.8	1.08909e+18	6.78066	2.43271e+13	0.280509	597631	0.959915	489.312	17.6933	-36.9812	1.74203	9	no
LBT-2mm/s	47_54	489	28.1	130.3	1.10177e+18	6.78459	2.44032e+13	0.280073	599064	0.950397	489.295	17.6985	-36.981	1.74147	9	no
LBT-2mm/s	47_55	489	27.3	133.3	1.12714e+18	6.79231	2.45537e+13	0.279219	601893	0.944851	489.26	17.6472	-36.9804	1.73989	9	no
LBT-2mm/s	47_56	489	26.4	136.2	1.15166e+18	6.79963	2.46968e+13	0.278414	604579	0.937895	489.181	17.5243	-36.979	1.73591	9	no
LBT-2mm/s	47_57	489	25	127.7	1.07978e+18	6.77775	2.42708e+13	0.280833	596571	0.925366	489.052	17.4495	-36.976	1.72783	9	no
LBT-2mm/s	47_58	488	23.6	119.2	1.05767e+18	6.77075	2.41356e+13	0.281614	594022	0.910423	488.892	17.3804	-36.9723	1.71753	9	no
LBT-2mm/s	47_59	488	22.5	109.1	9.68055e+17	6.74084	2.35655e+13	0.284988	583237	0.896709	488.685	17.2688	-36.9679	1.70558	9	no
LBT-2mm/s	47_60	488	18.8	121.1	1.07453e+18	6.7761	2.42389e+13	0.281017	595969	0.834328	488.469	17.1191	-36.9631	1.69218	9	no
LBT-2mm/s	47_61	488	18.8	123.6	1.09672e+18	6.78303	2.4373e+13	0.280246	598494	0.834328	488.226	17.0296	-36.9578	1.67778	9	no
LBT-2mm/s	47_62	488	16.5	121.5	1.07808e+18	6.77722	2.42605e+13	0.280892	596376	0.779075	487.933	16.9822	-36.9518	1.66114	10	no
LBT-2mm/s	47_63	487	13.9	108.5	1.01039e+18	6.75528	2.38394e+13	0.283351	588426	0.696093	487.703	16.9433	-36.9464	1.64637	14	no
LBT-2mm/s	47_64	487	12.1	112.8	1.05043e+18	6.76842	2.40909e+13	0.281874	593178	0.622799	487.488	16.9125	-36.9404	1.62967	20	no
LBT-2mm/s	47_65	487	10.2	117.1	1.09048e+18	6.78109	2.43355e+13	0.280461	597788	0.528562	487.318	16.9041	-36.9337	1.61147	25	no
LBT-2mm/s	47_66	487	7.8	86.5	8.05519e+17	6.67917	2.24245e+13	0.292146	561466	0.380993	487.231	17.0419	-36.9264	1.59125	27	no
LBT-2mm/s	47_67	487	5.3	55.8	5.1963e+17	6.53421	1.99214e+13	0.310092	512743	0.191129	487.296	18.2288	-36.9176	1.567	40	no
LBT-2mm/s	47_68	487	4.8	36.8	3.42695e+17	6.39934	1.78036e+13	0.328348	470363	0.149242	487.321	18.469	-36.9155	1.56128	43	no
LBT-2mm/s	47_69	487	4.2	17.7	1.64829e+17	6.16841	1.46111e+13	0.363617	404071	0.097957	487.388	18.6391	-36.9105	1.54761	45	no
LBT-2mm/s	47_70	487	4	12.9	1.20129e+17	6.07094	1.34149e+13	0.380232	378351	0.0807714	487.427	18.4858	-36.9063	1.53607	45	no
LBT-2mm/s	47_71	487	3.8	8.1	7.54301e+16	5.93033	1.1831e+13	0.406331	343412	0.063642	487.383	18.347	-36.9024	1.52531	45	no
LBT-2mm/s	47_72	487	3.9	8.1	7.54301e+16	5.93087	1.1831e+13	0.406331	343419	0.0721943	487.317	18.2575	-36.9007	1.52044	45	no
LBT-2mm/s	47_73	486	3.9	8.1	7.91743e+16	5.94525	1.19867e+13	0.403518	346902	0.0721943	487.243	18.1601	-36.8993	1.51664	45	no
LBT-2mm/s	47_74	486	4.2	12	1.17295e+17	6.06436	1.33287e+13	0.381522	376486	0.097957	487.197	18.1551	-36.8984	1.51432	45	no
LBT-2mm/s	47_75	486	4.5	29.5	2.88351e+17	6.34397	1.69927e+13	0.33629	453815	0.123693	487.169	18.1864	-36.8978	1.51272	45	no
LBT-2mm/s	47_76	486	9.4	246.3	2.40749e+18	7.055	3.01374e+13	0.252419	704211	0.483092	487.004	18.622	-36.8952	1.50531	30	no
LBT-2mm/s	47_77	485	14.3	129.9	1.33292e+18	6.8495	2.56909e+13	0.273019	623143	0.7105	486.196	17.5152	-36.8976	1.51201	10	no
LBT-2mm/s	47_78	485	19	123.7	1.2693e+18	6.83278	2.53539e+13	0.274811	616869	0.83846	485.811	16.9906	-36.8937	1.50131	8	no
LBT-2mm/s	47_79	485	23.6	117.5	1.20568e+18	6.81523	2.50044e+13	0.276709	610341	0.910423	485.689	16.9857	-36.8901	1.49138	8	no
LBT-2mm/s	47_80	485	26.5	119.8	1.22928e+18	6.82184	2.51356e+13	0.275991	612794	0.938708	485.654	16.99	-36.8868	1.48227	8	no
LBT-2mm/s	47_81	485	29.3	122.1	1.25288e+18	6.82833	2.5265e+13	0.27529	615210	0.957717	485.666	16.99	-36.8837	1.47381	8	no
LBT-2mm/s	47_82	485	32.4	132.6	1.36062e+18	6.85655	2.5834e+13	0.27227	625801	0.972109	485.69	16.988	-36.8814	1.46756	8	no
LBT-2mm/s	47_83	485	35.4	143.1	1.46837e+18	6.88273	2.63711e+13	0.269515	635746	0.981439	485.717	16.9863	-36.8794	1.46205	7	no
LBT-2mm/s	47_84	485	36.7	156.7	1.60792e+18	6.91404	2.70255e+13	0.266276	647799	0.984462	485.739	16.9851	-36.8777	1.4573	7	no
LBT-2mm/s	48_9	485	35.2	74.2	7.61375e+17	6.66038	2.20859e+13	0.294384	554953	0.980926	485.778	16.982	-36.8299	1.32576	8	no
LBT-2mm/s	48_10	485	31	66.1	6.7826e+17	6.62199	2.14072e+13	0.299036	541829	0.966322	485.758	16.9839	-36.8315	1.33008	8	no
LBT-2mm/s	48_11	485	26.7	57.9	5.94119e+17	6.57828	2.06552e+13	0.304473	527171	0.940303	485.741	16.9855	-36.8329	1.33415	8	no
LBT-2mm/s	48_12	485	27.1	81.7	8.38333e+17	6.69252	2.26676e+13	0.290574	566125	0.943373	485.724	16.9869	-36.8346	1.33878	8	no
LBT-2mm/s	48_13	485	27.5	105.4	1.08152e+18	6.7783	2.42813e+13	0.280772	596769	0.946291	485.695	16.9889	-36.8374	1.34633	8	no
LBT-2mm/s	48_14	485	24.7	95.8	9.83015e+17	6.74601	2.36632e+13	0.284401	585091	0.922381	485.665	16.9901	-36.8401	1.35386	8	no
LBT-2mm/s	48_15	485	21.9	86.2	8.84508e+17	6.71049	2.29981e+13	0.288477	572443	0.888404	485.625	16.9926	-36.8435	1.36333	8	no
LBT-2mm/s	48_16	485	19.3	82.2	8.43464e+17	6.69456	2.2705e+13	0.290334	566841	0.844474	485.588	16.9959	-36.8478	1.37517	9	no
LBT-2mm/s	48_17	485	16.7	78.1	8.01393e+17	6.67746	2.23935e+13	0.292349	560869	0.784493	485.597	16.9964	-36.8521	1.38697	9	no
LBT-2mm/s	48_18	485	13.3	66.3	6.80312e+17	6.62299	2.14247e+13	0.298913	542168	0.673246	485.662	17.0013	-36.8567	1.39951	9	no
LBT-2mm/s	48_19	485	9.8	54.4	5.58205e+17	6.55781	2.03103e+13	0.307073	520407	0.506277	485.876	17.1796	-36.8619	1.41393	10	no
LBT-2mm/s	48_20	486	7.1	34.5	3.37224e+17	6.39462	1.77264e+13	0.329079	468802	0.331496	486.416	18.9966	-36.8617	1.41335	35	no
LBT-2mm/s	48_21	486	4.4	14.6	1.42709e+17	6.12458	1.40535e+13	0.371077	392159	0.115129	486.777	19.4352	-36.8582	1.40355	44	no
LBT-2mm/s	48_22	486	4.2	11.1	1.08498e+17	6.04077	1.30511e+13	0.38577	370431	0.097957	486.881	19.143	-36.8587	1.40508	44	no
LBT-2mm/s	48_23	486	3.9	7.5	7.33096e+16	5.92242	1.17402e+13	0.407998	341385	0.0721943	487.004	18.8571	-36.8607	1.41061	44	no
LBT-2mm/s	48_24	487	3.8	7.2	6.7049e+16	5.89551	1.14606e+13	0.413268	335086	0.063642	487.097	18.7138	-36.8634	1.41786	44	no
LBT-2mm/s	48_25	487	3.7	6.9	6.42553e+16	5.88232	1.13297e+13	0.415809	332118	0.0551285	487.212	18.6897	-36.8668	1.42724	44	no
LBT-2mm/s	48_26	487	3.9	9.2	8.56737e+16	5.96875	1.22448e+13	0.398985	352648	0.0721943	487.276	18.7456	-36.8694	1.43446	44	no
LBT-2mm/s	48_27	487	4.1	11.4	1.06161e+17	6.0339	1.29746e+13	0.386967	368752	0.0893621	487.314	18.8357	-36.8729	1.44404	44	no
LBT-2mm/s	48_28	487	4.4	25.1	2.3374e+17	6.27755	1.60561e+13	0.346256	434470	0.115129	487.318	18.9311	-36.8757	1.45176	44	no
LBT-2mm/s	48_29	487	4.7	38.7	3.60388e+17	6.41537	1.80473e+13	0.326074	475295	0.140754	487.309	19.0468	-36.8778	1.45757	44	no
LBT-2mm/s	48_30	487	6.2	168.6	1.57006e+18	6.90578	2.68522e+13	0.267122	644614	0.263565	487.163	17.7057	-36.8965	1.50891	28	no
LBT-2mm/s	48_31	487	7.6	58.4	5.43842e+17	6.54926	2.01679e+13	0.308168	517605	0.367153	487.218	16.9247	-36.9066	1.53687	25	no
LBT-2mm/s	48_32	487	9.1	63.4	5.90404e+17	6.57622	2.06202e+13	0.304734	526486	0.465099	487.344	16.8926	-36.9149	1.55971	20	no
LBT-2mm/s	48_33	487	10.6	68.3	6.36034e+17	6.60074	2.10389e+13	0.30166	534666	0.549968	487.531	16.9185	-36.9228	1.58129	14	no
LBT-2mm/s	48_34	488	13.1	85.5	7.5865e+17	6.65918	2.20645e+13	0.294527	554541	0.665288	487.769	16.9334	-36.9306	1.60274	10	no
LBT-2mm/s	48_35	488	15.1	91.1	8.0834e+17	6.68034	2.24457e+13	0.292008	561872	0.737445	488.028	16.9709	-36.938	1.62317	10	no
LBT-2mm/s	48_36	488	14.3	81.9	7.26707e+17	6.64488	2.18097e+13	0.296249	549625	0.7105	488.291	17.0257	-36.9452	1.64295	10	no
LBT-2mm/s	48_37	488	14.4	68.3	6.06033e+17	6.58482	2.07662e+13	0.303651	529343	0.714002	488.538	17.1236	-36.9522	1.66231	10	no
LBT-2mm/s	48_38	488	15.2	66.1	5.86512e+17	6.57405	2.05834e+13	0.305008	525766	0.740644	488.75	17.2486	-36.9587	1.6802	10	no
LBT-2mm/s	48_39	489	17.7	79.7	6.73914e+17	6.61987	2.13701e+13	0.299297	541109	0.809762	488.928	17.3681	-36.9647	1.69679	10	no
LBT-2mm/s	48_40	489	20.1	93.3	7.88911e+17	6.67222	2.22987e+13	0.292971	559049	0.859494	489.082	17.4903	-36.97	1.71123	10	no
LBT-2mm/s	48_41	489	21.8	95.9	8.10895e+17	6.6814	2.24648e+13	0.291884	562239	0.88696	489.159	17.5464	-36.973	1.71953	10	no
LBT-2mm/s	48_42	489	23.5	98.4	8.32035e+17	6.69	2.26215e+13	0.29087	565242	0.909253	489.213	17.5766	-36.9751	1.72532	10	no
LBT-2mm/s	48_43	489	25.4	99.9	8.44718e+17	6.69506	2.27141e+13	0.290276	567015	0.929175	489.269	17.6202	-36.9768	1.73	10	no
LBT-2mm/s	48_44	489	27.2	101.4	8.57401e+17	6.70005	2.28057e+13	0.289692	568767	0.944117	489.302	17.656	-36.9778	1.73272	10	no
LBT-2mm/s	48_45	489	27.6	92	7.77918e+17	6.66754	2.22144e+13	0.293528	557428	0.946997	489.319	17.6815	-36.9785	1.73467	13	no
LBT-2mm/s	48_46	489	27.9	82.5	6.9759e+17	6.6313	2.15702e+13	0.297897	544991	0.949063	489.325	17.6984	-36.9791	1.73615	13	no
LBT-2mm/s	48_47	489	26	80.3	6.78988e+17	6.62235	2.14134e+13	0.298992	541950	0.934539	489.328	17.7093	-36.9796	1.73752	13	no
LBT-2mm/s	48_48	489	24.1	78.1	6.60385e+17	6.61316	2.12534e+13	0.300123	538841	0.916063	489.328	17.711	-36.98	1.73862	13	no
LBT-2mm/s	48_49	489	26	80.3	6.78988e+17	6.62235	2.14134e+13	0.298992	541950	0.934539	489.328	17.7027	-36.9803	1.7397	13	no
LBT-2mm/s	48_50	489	27.9	82.5	6.9759e+17	6.6313	2.15702e+13	0.297897	544991	0.949063	489.326	17.6875	-36.9807	1.7407	13	no
LBT-2mm/s	48_51	489	27.6	92	7.77918e+17	6.66754	2.22144e+13	0.293528	557428	0.946997	489.321	17.6752	-36.981	1.74151	10	no
LBT-2mm/s	48_52	489	27.2	101.4	8.57401e+17	6.70005	2.28057e+13	0.289692	568767	0.944117	489.316	17.6784	-36.9811	1.74188	10	no
LBT-2mm/s	48_53	489	25.4	99.9	8.44718e+17	6.69506	2.27141e+13	0.290276	567015	0.929175	489.302	17.7022	-36.9812	1.74191	10	no
LBT-2mm/s	48_54	489	23.5	98.4	8.32035e+17	6.69	2.26215e+13	0.29087	565242	0.909253	489.286	17.7103	-36.9809	1.74133	10	no
LBT-2mm/s	48_55	489	21.8	95.9	8.10895e+17	6.6814	2.24648e+13	0.291884	562239	0.88696	489.251	17.6594	-36.9804	1.73978	10	no
LBT-2mm/s	48_56	489	20.1	93.3	7.88911e+17	6.67222	2.22987e+13	0.292971	559049	0.859494	489.171	17.5303	-36.9789	1.73586	10	no
LBT-2mm/s	48_57	489	17.7	79.7	6.73914e+17	6.61987	2.13701e+13	0.299297	541109	0.809762	489.042	17.4542	-36.976	1.72782	10	no
LBT-2mm/s	48_58	488	15.2	66.1	5.86512e+17	6.57405	2.05834e+13	0.305008	525766	0.740644	488.881	17.3821	-36.9723	1.7176	10	no
LBT-2mm/s	48_59	488	14.4	68.3	6.06033e+17	6.58482	2.07662e+13	0.303651	529343	0.714002	488.673	17.2696	-36.968	1.70578	10	no
LBT-2mm/s	48_60	488	14.3	81.9	7.26707e+17	6.64488	2.18097e+13	0.296249	549625	0.7105	488.456	17.1187	-36.9632	1.69244	10	no
LBT-2mm/s	48_61	488	15.1	91.1	8.0834e+17	6.68034	2.24457e+13	0.292008	561872	0.737445	488.21	17.0289	-36.958	1.67817	10	no
LBT-2mm/s	48_62	488	13.1	85.5	7.5865e+17	6.65918	2.20645e+13	0.294527	554541	0.665288	487.914	16.9841	-36.952	1.66167	10	no
LBT-2mm/s	48_63	487	10.6	68.3	6.36034e+17	6.60074	2.10389e+13	0.30166	534666	0.549968	487.681	16.9463	-36.9467	1.6471	14	no
LBT-2mm/s	48_64	487	9.1	63.4	5.90404e+17	6.57622	2.06202e+13	0.304734	526486	0.465099	487.46	16.9167	-36.9407	1.63074	20	no
LBT-2mm/s	48_65	487	7.6	58.4	5.43842e+17	6.54926	2.01679e+13	0.308168	517605	0.367153	487.28	16.9055	-36.9344	1.61326	25	no
LBT-2mm/s	48_66	487	6.2	48.6	4.52581e+17	6.48936	1.9192e+13	0.316015	498278	0.263565	487.172	16.9845	-36.9277	1.59473	28	no
LBT-2mm/s	48_67	487	4.7	38.7	3.60388e+17	6.41537	1.80473e+13	0.326074	475295	0.140754	487.213	18.1497	-36.92	1.57358	44	no
LBT-2mm/s	48_68	487	4.4	25.1	2.3374e+17	6.27755	1.60561e+13	0.346256	434470	0.115129	487.234	18.4083	-36.9181	1.56849	44	no
LBT-2mm/s	48_69	487	4.1	11.4	1.06161e+17	6.0339	1.29746e+13	0.386967	368752	0.0893621	487.3	18.5832	-36.913	1.55452	44	no
LBT-2mm/s	48_70	487	3.9	9.2	8.56737e+16	5.96875	1.22448e+13	0.398985	352648	0.0721943	487.343	18.4706	-36.9083	1.54157	44	no
LBT-2mm/s	48_71	487	3.7	6.9	6.42553e+16	5.88232	1.13297e+13	0.415809	332118	0.0551285	487.301	18.3472	-36.9039	1.52947	44	no
LBT-2mm/s	48_72	487	3.8	7.2	6.7049e+16	5.89551	1.14606e+13	0.413268	335086	0.063642	487.233	18.2731	-36.9019	1.52389	44	no
LBT-2mm/s	48_73	486	3.9	7.5	7.33096e+16	5.92242	1.17402e+13	0.407998	341385	0.0721943	487.154	18.1859	-36.9003	1.51938	44	no
LBT-2mm/s	48_74	486	4.2	11.1	1.08498e+17	6.04077	1.30511e+13	0.38577	370431	0.097957	487.102	18.188	-36.8993	1.51666	44	no
LBT-2mm/s	48_75	486	4.4	14.6	1.42709e+17	6.12458	1.40535e+13	0.371077	392159	0.115129	487.07	18.2251	-36.8986	1.51481	44	no
LBT-2mm/s	48_76	486	7.1	169.4	1.65582e+18	6.92419	2.72406e+13	0.265239	651745	0.331496	486.875	18.7504	-36.8956	1.50665	35	no
LBT-2mm/s	48_77	485	9.8	54.4	5.58205e+17	6.55781	2.03103e+13	0.307073	520407	0.506277	486.093	17.507	-36.8982	1.51371	10	no
LBT-2mm/s	48_78	485	13.3	66.3	6.80312e+17	6.62299	2.14247e+13	0.298913	542168	0.673246	485.746	16.9978	-36.8939	1.5019	9	no
LBT-2mm/s	48_79	485	16.7	78.1	8.01393e+17	6.67746	2.23935e+13	0.292349	560869	0.784493	485.639	16.9942	-36.8902	1.49178	9	no
LBT-2mm/s	48_80	485	19.3	82.2	8.43464e+17	6.69456	2.2705e+13	0.290334	566841	0.844474	485.614	16.9968	-36.8869	1.48261	9	no
LBT-2mm/s	48_81	485	21.9	86.2	8.84508e+17	6.71049	2.29981e+13	0.288477	572443	0.888404	485.633	16.9953	-36.8838	1.47414	8	no
LBT-2mm/s	48_82	485	24.7	95.8	9.83015e+17	6.74601	2.36632e+13	0.284401	585091	0.922381	485.662	16.9924	-36.8815	1.46787	8	no
LBT-2mm/s	48_83	485	27.5	105.4	1.08152e+18	6.7783	2.42813e+13	0.280772	596769	0.946291	485.692	16.99	-36.8795	1.46234	8	no
LBT-2mm/s	48_84	485	27.1	81.7	8.38333e+17	6.69252	2.26676e+13	0.290574	566125	0.943373	485.716	16.9886	-36.8778	1.45757	8	no
LBT-2mm/s	48_85	485	26.7	57.9	5.94119e+17	6.57828	2.06552e+13	0.304473	527171	0.940303	485.738	16.9873	-36.8759	1.45242	8	no
LBT-2mm/s	49_7	485	31.6	62.1	6.37215e+17	6.60136	2.10494e+13	0.301584	534871	0.968932	485.784	16.9825	-36.8273	1.31866	8	no
LBT-2mm/s	49_8	485	29.4	58.3	5.98223e+17	6.58055	2.06936e+13	0.304188	527923	0.958277	485.76	16.9848	-36.8289	1.32299	8	no
LBT-2mm/s	49_9	485	27.1	54.4	5.58205e+17	6.55781	2.03103e+13	0.307073	520407	0.943373	485.749	16.9861	-36.8298	1.32558	9	no
LBT-2mm/s	49_10	485	23.3	47.1	4.83298e+17	6.51073	1.95353e+13	0.313183	505104	0.906867	485.731	16.9882	-36.8315	1.33013	9	no
LBT-2mm/s	49_11	485	19.4	39.8	4.08392e+17	6.45614	1.8667e+13	0.320506	487783	0.846432	485.715	16.9898	-36.833	1.33432	9	no
LBT-2mm/s	49_12	485	19.1	52.5	5.38709e+17	6.54616	2.01163e+13	0.308568	516589	0.840489	485.699	16.9912	-36.8347	1.33903	9	no
LBT-2mm/s	49_13	485	18.8	65.1	6.67999e+17	6.61695	2.13193e+13	0.299656	540122	0.834328	485.67	16.9935	-36.8375	1.34668	10	no
LBT-2mm/s	49_14	485	16.6	57.6	5.9104e+17	6.57657	2.06262e+13	0.304689	526604	0.7818	485.64	16.9949	-36.8402	1.35422	10	no
LBT-2mm/s	49_15	485	14.4	50.1	5.14082e+17	6.53086	1.98638e+13	0.310547	511606	0.714002	485.595	16.9986	-36.8437	1.36374	10	no
LBT-2mm/s	49_16	485	11.8	41.7	4.27888e+17	6.47121	1.89035e+13	0.318458	492520	0.609136	485.549	17.0043	-36.848	1.37561	10	no
LBT-2mm/s	49_17	485	9.1	33.2	3.40669e+17	6.39787	1.77751e+13	0.328617	469791	0.465099	485.552	17.0069	-36.8523	1.38748	10	no
LBT-2mm/s	49_18	485	7.2	26.2	2.68841e+17	6.32257	1.66743e+13	0.339577	447280	0.338748	485.603	17.0161	-36.8569	1.40019	10	no
LBT-2mm/s	49_19	485	5.3	19.1	1.95987e+17	6.22328	1.53103e+13	0.354886	418882	0.191129	485.794	17.1558	-36.8625	1.41549	10	no
LBT-2mm/s	49_20	486	4.7	14.8	1.44664e+17	6.12916	1.41052e+13	0.370365	393275	0.140754	486.267	18.9238	-36.8638	1.41915	20	no
LBT-2mm/s	49_21	486	4.1	10.5	1.02633e+17	6.02371	1.28567e+13	0.388832	366169	0.0893621	486.61	19.6299	-36.8596	1.40764	35	no
LBT-2mm/s	49_22	486	4	8.6	8.40616e+16	5.96353	1.21822e+13	0.400071	351262	0.0807714	486.717	19.3185	-36.8603	1.40942	42	no
LBT-2mm/s	49_23	486	3.8	6.6	6.45124e+16	5.88415	1.13419e+13	0.41557	332404	0.063642	486.863	18.938	-36.8624	1.41521	42	no
LBT-2mm/s	49_24	486	3.8	6.5	6.3535e+16	5.87966	1.12953e+13	0.416485	331347	0.063642	486.973	18.7306	-36.8653	1.42321	42	no
LBT-2mm/s	49_25	486	3.7	6.3	6.158e+16	5.86983	1.12004e+13	0.418366	329187	0.0551285	487.099	18.6571	-36.8691	1.43375	42	no
LBT-2mm/s	49_26	487	3.8	8.1	7.54301e+16	5.93033	1.1831e+13	0.406331	343412	0.063642	487.166	18.7006	-36.8722	1.4421	42	no
LBT-2mm/s	49_27	487	3.9	9.9	9.21924e+16	5.99067	1.24897e+13	0.394826	358073	0.0721943	487.207	18.7823	-36.8762	1.45305	42	no
LBT-2mm/s	49_28	487	4	10.8	1.00574e+17	6.01724	1.27866e+13	0.389957	364622	0.0807714	487.212	18.8431	-36.8793	1.46181	42	no
LBT-2mm/s	49_29	487	4.1	11.6	1.08023e+17	6.03915	1.30357e+13	0.386011	370089	0.0893621	487.205	18.8983	-36.8817	1.46822	42	no
LBT-2mm/s	49_30	487	4.5	13.7	1.27579e+17	6.09052	1.36346e+13	0.377004	383132	0.123693	487.084	17.4984	-36.8994	1.51706	41	no
LBT-2mm/s	49_31	487	4.9	15.7	1.46204e+17	6.13257	1.41456e+13	0.369812	394144	0.157697	487.173	16.9183	-36.9078	1.54011	40	no
LBT-2mm/s	49_32	487	5.8	20.4	1.89972e+17	6.21369	1.5182e+13	0.35644	416181	0.231892	487.309	16.9006	-36.9156	1.56154	35	no
LBT-2mm/s	49_33	487	6.7	25.1	2.3374e+17	6.27849	1.60561e+13	0.346256	434484	0.301891	487.505	16.9243	-36.9232	1.58243	31	no
LBT-2mm/s	49_34	487	8.7	40.2	3.74357e+17	6.42811	1.82335e+13	0.324369	479065	0.440292	487.747	16.9368	-36.9309	1.60356	27	no
LBT-2mm/s	49_35	488	10.4	49.4	4.38331e+17	6.47902	1.9027e+13	0.317405	494987	0.539373	488.009	16.9726	-36.9382	1.62375	23	no
LBT-2mm/s	49_36	488	9.3	38.2	3.38953e+17	6.39626	1.77509e+13	0.328846	469300	0.477152	488.274	17.0256	-36.9453	1.64338	19	no
LBT-2mm/s	49_37	488	6.7	14.1	1.25111e+17	6.08531	1.35629e+13	0.378049	381589	0.301891	488.523	17.1236	-36.9523	1.66261	17	no
LBT-2mm/s	49_38	488	6.7	12.4	1.10026e+17	6.04635	1.31005e+13	0.385004	371529	0.301891	488.736	17.2489	-36.9588	1.68034	15	no
LBT-2mm/s	49_39	488	10.3	31.3	2.77728e+17	6.33286	1.68213e+13	0.338046	450308	0.533995	488.914	17.3702	-36.9648	1.69679	12	no
LBT-2mm/s	49_40	488	13.8	50.1	4.44542e+17	6.48358	1.90994e+13	0.316793	496432	0.692389	489.07	17.4969	-36.9699	1.71109	12	no
LBT-2mm/s	49_41	489	16.5	59.3	5.01419e+17	6.52272	1.97305e+13	0.311609	508970	0.779075	489.146	17.5554	-36.9729	1.71933	10	no
LBT-2mm/s	49_42	489	19.1	68.5	5.79211e+17	6.56993	2.05139e+13	0.30553	524404	0.840489	489.199	17.584	-36.975	1.72508	10	no
LBT-2mm/s	49_43	489	21	67.8	5.73292e+17	6.56656	2.04571e+13	0.305958	523289	0.874741	489.255	17.6276	-36.9767	1.72973	10	no
LBT-2mm/s	49_44	489	22.9	67.1	5.67373e+17	6.56315	2.03999e+13	0.306392	522166	0.901914	489.289	17.6645	-36.9777	1.73244	10	no
LBT-2mm/s	49_45	489	24.2	58.7	4.96346e+17	6.51941	1.96764e+13	0.312043	507899	0.917149	489.305	17.6912	-36.9784	1.73437	10	no
LBT-2mm/s	49_46	489	25.5	50.3	4.25318e+17	6.46926	1.88728e+13	0.318721	491905	0.930097	489.311	17.7093	-36.9789	1.73584	10	no
LBT-2mm/s	49_47	489	22.5	43.6	3.68666e+17	6.42319	1.81582e+13	0.325054	477546	0.896709	489.313	17.7219	-36.9794	1.73721	10	no
LBT-2mm/s	49_48	489	19.5	36.9	3.12013e+17	6.36983	1.73584e+13	0.332634	461310	0.848366	489.314	17.7248	-36.9798	1.73831	10	no
LBT-2mm/s	49_49	489	22.5	43.6	3.68666e+17	6.42319	1.81582e+13	0.325054	477546	0.896709	489.315	17.715	-36.9802	1.73937	10	no
LBT-2mm/s	49_50	489	25.5	50.3	4.25318e+17	6.46926	1.88728e+13	0.318721	491905	0.930097	489.313	17.6975	-36.9806	1.74037	10	no
LBT-2mm/s	49_51	489	24.2	58.7	4.96346e+17	6.51941	1.96764e+13	0.312043	507899	0.917149	489.308	17.6812	-36.9809	1.74121	10	no
LBT-2mm/s	49_52	489	22.9	67.1	5.67373e+17	6.56315	2.03999e+13	0.306392	522166	0.901914	489.303	17.6856	-36.981	1.74155	10	no
LBT-2mm/s	49_53	489	21	67.8	5.73292e+17	6.56656	2.04571e+13	0.305958	523289	0.874741	489.289	17.7133	-36.981	1.74155	10	no
LBT-2mm/s	49_54	489	19.1	68.5	5.79211e+17	6.56993	2.05139e+13	0.30553	524404	0.840489	489.273	17.7244	-36.9808	1.74094	13	no
LBT-2mm/s	49_55	489	16.5	59.3	5.01419e+17	6.52272	1.97305e+13	0.311609	508970	0.779075	489.239	17.6755	-36.9802	1.73943	15	no
LBT-2mm/s	49_56	488	13.8	50.1	4.44542e+17	6.48358	1.90994e+13	0.316793	496432	0.692389	489.16	17.5417	-36.9788	1.73558	17	no
LBT-2mm/s	49_57	488	10.3	31.3	2.77728e+17	6.33286	1.68213e+13	0.338046	450308	0.533995	489.03	17.4605	-36.976	1.72764	21	no
LBT-2mm/s	49_58	488	6.7	12.4	1.10026e+17	6.04635	1.31005e+13	0.385004	371529	0.301891	488.867	17.3828	-36.9723	1.71756	24	no
LBT-2mm/s	49_59	488	6.7	14.1	1.25111e+17	6.08531	1.35629e+13	0.378049	381589	0.301891	488.658	17.2672	-36.9681	1.70589	27	no
LBT-2mm/s	49_60	488	9.3	38.2	3.38953e+17	6.39626	1.77509e+13	0.328846	469300	0.477152	488.441	17.1187	-36.9632	1.69265	29	no
LBT-2mm/s	49_61	488	10.4	49.4	4.38331e+17	6.47902	1.9027e+13	0.317405	494987	0.539373	488.191	17.0277	-36.9581	1.67854	32	no
LBT-2mm/s	49_62	487	8.7	40.2	3.74357e+17	6.42811	1.82335e+13	0.324369	479065	0.440292	487.895	16.9856	-36.9522	1.66217	35	no
LBT-2mm/s	49_63	487	6.7	25.1	2.3374e+17	6.27849	1.60561e+13	0.346256	434484	0.301891	487.659	16.9491	-36.9469	1.64778	37	no
LBT-2mm/s	49_64	487	5.8	20.4	1.89972e+17	6.21369	1.5182e+13	0.35644	416181	0.231892	487.431	16.9211	-36.9411	1.63176	39	no
LBT-2mm/s	49_65	487	4.9	15.7	1.46204e+17	6.13257	1.41456e+13	0.369812	394144	0.157697	487.241	16.9084	-36.935	1.615	40	no
LBT-2mm/s	49_66	487	4.5	13.7	1.27579e+17	6.09052	1.36346e+13	0.377004	383132	0.123693	487.112	16.9192	-36.9289	1.59807	41	no
LBT-2mm/s	49_67	487	4.1	11.6	1.08023e+17	6.03915	1.30357e+13	0.386011	370089	0.0893621	487.128	17.9589	-36.9222	1.57985	42	no
LBT-2mm/s	49_68	487	4	10.8	1.00574e+17	6.01724	1.27866e+13	0.389957	364622	0.0807714	487.147	18.1959	-36.9204	1.57486	42	no
LBT-2mm/s	49_69	487	3.9	9.9	9.21924e+16	5.99067	1.24897e+13	0.394826	358073	0.0721943	487.2	18.4203	-36.9157	1.56193	42	no
LBT-2mm/s	49_70	487	3.8	8.1	7.54301e+16	5.93033	1.1831e+13	0.406331	343412	0.063642	487.235	18.3939	-36.9108	1.54848	42	no
LBT-2mm/s	49_71	486	3.7	6.3	6.158e+16	5.86983	1.12004e+13	0.418366	329187	0.0551285	487.191	18.3074	-36.906	1.53512	42	no
LBT-2mm/s	49_72	486	3.8	6.5	6.3535e+16	5.87966	1.12953e+13	0.416485	331347	0.063642	487.12	18.2537	-36.9036	1.52865	42	no
LBT-2mm/s	49_73	486	3.8	6.6	6.45124e+16	5.88415	1.13419e+13	0.41557	332404	0.063642	487.034	18.1854	-36.9017	1.52322	42	no
LBT-2mm/s	49_74	486	4	8.6	8.40616e+16	5.96353	1.21822e+13	0.400071	351262	0.0807714	486.978	18.1941	-36.9005	1.51999	42	no
LBT-2mm/s	49_75	486	4.1	10.5	1.02633e+17	6.02371	1.28567e+13	0.388832	366169	0.0893621	486.941	18.2309	-36.8997	1.51788	35	no
LBT-2mm/s	49_76	486	4.7	14.8	1.44664e+17	6.12916	1.41052e+13	0.370365	393275	0.140754	486.714	18.7684	-36.8967	1.50967	20	no
LBT-2mm/s	49_77	485	5.3	19.1	1.95987e+17	6.22328	1.53103e+13	0.354886	418882	0.191129	485.987	17.4768	-36.8989	1.51559	10	no
LBT-2mm/s	49_78	485	7.2	26.2	2.68841e+17	6.32257	1.66743e+13	0.339577	447280	0.338748	485.68	17.0094	-36.8941	1.50245	10	no
LBT-2mm/s	49_79	485	9.1	33.2	3.40669e+17	6.39787	1.77751e+13	0.328617	469791	0.465099	485.589	17.0032	-36.8904	1.49216	10	no
LBT-2mm/s	49_80	485	11.8	41.7	4.27888e+17	6.47121	1.89035e+13	0.318458	492520	0.609136	485.573	17.0038	-36.887	1.48295	10	no
LBT-2mm/s	49_81	485	14.4	50.1	5.14082e+17	6.53086	1.98638e+13	0.310547	511606	0.714002	485.6	17.0008	-36.8839	1.47446	10	no
LBT-2mm/s	49_82	485	16.6	57.6	5.9104e+17	6.57657	2.06262e+13	0.304689	526604	0.7818	485.634	16.9968	-36.8817	1.46819	9	no
LBT-2mm/s	49_83	485	18.8	65.1	6.67999e+17	6.61695	2.13193e+13	0.299656	540122	0.834328	485.668	16.9939	-36.8796	1.46264	9	no
LBT-2mm/s	49_84	485	19.1	52.5	5.38709e+17	6.54616	2.01163e+13	0.308568	516589	0.840489	485.693	16.9922	-36.8779	1.45785	9	no
LBT-2mm/s	49_85	485	19.4	39.8	4.08392e+17	6.45614	1.8667e+13	0.320506	487783	0.846432	485.715	16.9908	-36.876	1.45264	9	no
LBT-2mm/s	49_86	485	23.3	47.1	4.83298e+17	6.51073	1.95353e+13	0.313183	505104	0.906867	485.728	16.99	-36.8747	1.44894	8	no
LBT-2mm/s	49_87	485	27.1	54.4	5.58205e+17	6.55781	2.03103e+13	0.307073	520407	0.943373	485.736	16.9895	-36.8739	1.44676	8	no
LBT-2mm/s	50_6	485	42.4	79.3	8.13706e+17	6.68255	2.24858e+13	0.291747	562642	0.992934	485.785	16.9839	-36.825	1.31242	8	no
LBT-2mm/s	50_7	485	24.7	45.9	4.70985e+17	6.50233	1.93997e+13	0.314292	502410	0.922381	485.75	16.9867	-36.827	1.31781	9	no
LBT-2mm/s	50_8	485	20.4	36.8	3.77609e+17	6.43089	1.82761e+13	0.323982	479924	0.864762	485.732	16.9888	-36.8287	1.32258	11	no
LBT-2mm/s	50_9	485	16.1	27.6	2.83207e+17	6.33905	1.69103e+13	0.337131	452136	0.767856	485.723	16.99	-36.8297	1.32536	13	no
LBT-2mm/s	50_10	485	13.3	22.6	2.31901e+17	6.27602	1.60219e+13	0.346637	433772	0.673246	485.707	16.992	-36.8315	1.33013	13	no
LBT-2mm/s	50_11	485	10.5	17.5	1.7957e+17	6.19627	1.49529e+13	0.359267	411344	0.544697	485.694	16.9934	-36.833	1.33444	13	no
LBT-2mm/s	50_12	485	9.4	16.5	1.69308e+17	6.17807	14717232096958	0.362249	406348	0.483092	485.68	16.9946	-36.8348	1.33923	12	no
LBT-2mm/s	50_13	485	8.2	15.4	1.58021e+17	6.15679	1.44456e+13	0.365782	400566	0.407949	485.654	16.9962	-36.8376	1.34687	14	no
LBT-2mm/s	50_14	485	7.6	15.8	1.62126e+17	6.16469	1.4546e+13	0.364464	402705	0.367153	485.623	16.9981	-36.8403	1.35445	14	no
LBT-2mm/s	50_15	485	6.9	16.1	1.65204e+17	6.17049	1.462e+13	0.363501	404282	0.316812	485.575	17.0024	-36.8438	1.36397	15	no
LBT-2mm/s	50_16	485	6.5	15.9	1.63152e+17	6.16662	1.45708e+13	0.364141	403233	0.286734	485.525	17.0084	-36.8481	1.37587	15	no
LBT-2mm/s	50_17	485	6.1	15.6	1.60073e+17	6.16074	1.4496e+13	0.365118	401640	0.255729	485.524	17.0115	-36.8524	1.38775	16	no
LBT-2mm/s	50_18	485	5.5	14.7	1.50838e+17	6.14239	1.42653e+13	0.368188	396711	0.207582	485.571	17.0232	-36.8571	1.40055	16	no
LBT-2mm/s	50_19	485	4.8	13.8	1.41603e+17	6.1227	1.4024e+13	0.371485	391533	0.149242	485.747	17.1748	-36.8628	1.41635	17	no
LBT-2mm/s	50_20	486	4.4	10.5	1.02633e+17	6.02446	1.28567e+13	0.388832	366179	0.115129	486.175	18.5199	-36.8658	1.42466	25	no
LBT-2mm/s	50_21	486	3.9	7.1	6.93997e+16	5.90621	1.15678e+13	0.411224	337509	0.0721943	486.456	19.077	-36.8635	1.41826	34	no
LBT-2mm/s	50_22	486	3.8	6.6	6.45124e+16	5.88415	1.13419e+13	0.41557	332404	0.063642	486.544	19	-36.8637	1.41884	40	no
LBT-2mm/s	50_23	486	3.7	6.1	5.96251e+16	5.86037	1.11032e+13	0.420319	326980	0.0551285	486.686	18.8001	-36.8653	1.42322	40	no
LBT-2mm/s	50_24	486	3.7	6	5.86477e+16	5.85553	1.10538e+13	0.421323	325855	0.0551285	486.808	18.608	-36.8683	1.4314	40	no
LBT-2mm/s	50_25	486	3.7	5.8	5.66927e+16	5.84561	1.09531e+13	0.423393	323559	0.0551285	486.946	18.5604	-36.8723	1.44247	40	no
LBT-2mm/s	50_26	486	3.8	7.1	6.93997e+16	5.90567	1.15678e+13	0.411224	337501	0.063642	487.019	18.6037	-36.8757	1.45188	40	no
LBT-2mm/s	50_27	486	3.8	8.3	8.11293e+16	5.95197	1.20659e+13	0.40211	348661	0.063642	487.066	18.6587	-36.8802	1.46407	40	no
LBT-2mm/s	50_28	486	3.9	8.9	8.6994e+16	5.97331	1.22955e+13	0.398113	353773	0.0721943	487.077	18.6488	-36.8835	1.47315	40	no
LBT-2mm/s	50_29	486	3.9	9.4	9.18813e+16	5.98966	1.24783e+13	0.395016	357821	0.0721943	487.078	18.6196	-36.8857	1.47937	40	no
LBT-2mm/s	50_30	487	4.3	11	1.02436e+17	6.02368	1.28501e+13	0.388939	366030	0.106548	487.03	17.3103	-36.9008	1.52081	38	no
LBT-2mm/s	50_31	487	4.6	12.5	1.16405e+17	6.0628	1.33013e+13	0.381935	375900	0.132236	487.135	16.9111	-36.9083	1.5416	35	no
LBT-2mm/s	50_32	487	5	12.5	1.16405e+17	6.06314	1.33013e+13	0.381935	375905	0.166115	487.283	16.9073	-36.9159	1.56246	32	no
LBT-2mm/s	50_33	487	5.3	12.5	1.16405e+17	6.06327	1.33013e+13	0.381935	375907	0.191129	487.486	16.9269	-36.9234	1.58303	30	no
LBT-2mm/s	50_34	487	5.7	11.4	1.06161e+17	6.03549	1.29746e+13	0.386967	368774	0.22384	487.728	16.9388	-36.931	1.60399	27	no
LBT-2mm/s	50_35	488	6.1	12.7	1.12688e+17	6.05356	1.31853e+13	0.383698	373380	0.255729	487.99	16.9731	-36.9383	1.62403	25	no
LBT-2mm/s	50_36	488	5.9	10.3	9.1393e+16	5.99048	1.24603e+13	0.395317	357457	0.239892	488.258	17.0269	-36.9454	1.64351	23	no
LBT-2mm/s	50_37	488	5.8	10.1	8.96183e+16	5.9846	1.23945e+13	0.396426	356001	0.231892	488.506	17.1231	-36.9523	1.66267	22	no
LBT-2mm/s	50_38	488	6	10.1	8.96183e+16	5.98461	1.23945e+13	0.396426	356002	0.247838	488.72	17.2467	-36.9587	1.6802	18	no
LBT-2mm/s	50_39	488	7	10.8	9.58295e+16	6.00473	1.26208e+13	0.392652	361002	0.324184	488.9	17.373	-36.9646	1.69644	16	no
LBT-2mm/s	50_40	488	7.9	11.4	1.01153e+17	6.02099	1.28064e+13	0.389637	365087	0.387822	489.055	17.5037	-36.9697	1.71052	14	no
LBT-2mm/s	50_41	489	9.5	13.9	1.17533e+17	6.06634	1.3336e+13	0.381412	376664	0.488973	489.131	17.5673	-36.9727	1.71863	13	no
LBT-2mm/s	50_42	489	11.1	16.3	1.37827e+17	6.11485	1.3922e+13	0.372906	389345	0.575522	489.185	17.5982	-36.9748	1.72433	10	no
LBT-2mm/s	50_43	489	14.5	20.6	1.74186e+17	6.18685	1.48305e+13	0.360805	408752	0.717466	489.235	17.6382	-36.9765	1.72902	10	no
LBT-2mm/s	50_44	489	17.8	24.8	2.097e+17	6.24452	1.55925e+13	0.351543	424806	0.81213	489.266	17.6737	-36.9774	1.7317	10	no
LBT-2mm/s	50_45	489	19.5	18	1.52201e+17	6.14525	1.43e+13	0.367721	397455	0.848366	489.282	17.7005	-36.9781	1.73361	10	no
LBT-2mm/s	50_46	489	21.2	11.1	9.38576e+16	5.9985	1.25502e+13	0.393818	359443	0.877909	489.289	17.7191	-36.9787	1.73506	9	no
LBT-2mm/s	50_47	489	18.8	10.8	9.13209e+16	5.99028	1.24577e+13	0.395362	357399	0.834328	489.293	17.7323	-36.9792	1.73641	9	no
LBT-2mm/s	50_48	489	16.4	10.4	8.79386e+16	5.97899	1.23314e+13	0.397499	354603	0.776319	489.295	17.7363	-36.9795	1.73748	9	no
LBT-2mm/s	50_49	489	18.8	10.8	9.13209e+16	5.99028	1.24577e+13	0.395362	357399	0.834328	489.297	17.7304	-36.9799	1.73852	9	no
LBT-2mm/s	50_50	489	21.2	11.1	9.38576e+16	5.9985	1.25502e+13	0.393818	359443	0.877909	489.297	17.7155	-36.9803	1.73949	10	no
LBT-2mm/s	50_51	489	19.5	18	1.52201e+17	6.14525	1.43e+13	0.367721	397455	0.848366	489.293	17.7006	-36.9806	1.74029	10	no
LBT-2mm/s	50_52	489	17.8	24.8	2.097e+17	6.24452	1.55925e+13	0.351543	424806	0.81213	489.288	17.7002	-36.9807	1.74066	10	no
LBT-2mm/s	50_53	489	14.5	20.6	1.74186e+17	6.18685	1.48305e+13	0.360805	408752	0.717466	489.274	17.7235	-36.9807	1.74065	10	no
LBT-2mm/s	50_54	489	11.1	16.3	1.37827e+17	6.11485	1.3922e+13	0.372906	389345	0.575522	489.257	17.738	-36.9805	1.74001	13	no
LBT-2mm/s	50_55	489	9.5	13.9	1.17533e+17	6.06634	1.3336e+13	0.381412	376664	0.488973	489.223	17.6935	-36.9799	1.73854	14	no
LBT-2mm/s	50_56	488	7.9	11.4	1.01153e+17	6.02099	1.28064e+13	0.389637	365087	0.387822	489.146	17.567	-36.9786	1.7348	16	no
LBT-2mm/s	50_57	488	7	10.8	9.58295e+16	6.00473	1.26208e+13	0.392652	361002	0.324184	489.015	17.4686	-36.9758	1.72708	18	no
LBT-2mm/s	50_58	488	6	10.1	8.96183e+16	5.98461	1.23945e+13	0.396426	356002	0.247838	488.849	17.3816	-36.9722	1.71725	22	no
LBT-2mm/s	50_59	488	5.8	10.1	8.96183e+16	5.9846	1.23945e+13	0.396426	356001	0.231892	488.644	17.2549	-36.968	1.70574	23	no
LBT-2mm/s	50_60	488	5.9	10.3	9.1393e+16	5.99048	1.24603e+13	0.395317	357457	0.239892	488.425	17.1208	-36.9632	1.69264	25	no
LBT-2mm/s	50_61	488	6.1	12.7	1.12688e+17	6.05356	1.31853e+13	0.383698	373380	0.255729	488.172	17.0281	-36.9582	1.67869	27	no
LBT-2mm/s	50_62	487	5.7	11.4	1.06161e+17	6.03549	1.29746e+13	0.386967	368774	0.22384	487.88	16.9854	-36.9523	1.66241	30	no
LBT-2mm/s	50_63	487	5.3	12.5	1.16405e+17	6.06327	1.33013e+13	0.381935	375907	0.191129	487.645	16.949	-36.947	1.64806	32	no
LBT-2mm/s	50_64	487	5	12.5	1.16405e+17	6.06314	1.33013e+13	0.381935	375905	0.166115	487.407	16.9242	-36.9413	1.63234	35	no
LBT-2mm/s	50_65	487	4.6	12.5	1.16405e+17	6.0628	1.33013e+13	0.381935	375900	0.132236	487.216	16.9151	-36.9353	1.61581	38	no
LBT-2mm/s	50_66	487	4.3	11	1.02436e+17	6.02368	1.28501e+13	0.388939	366030	0.106548	487.076	16.909	-36.9294	1.59941	40	no
LBT-2mm/s	50_67	486	3.9	9.4	9.18813e+16	5.98966	1.24783e+13	0.395016	357821	0.0721943	487.058	17.6499	-36.9236	1.58346	40	no
LBT-2mm/s	50_68	486	3.9	8.9	8.6994e+16	5.97331	1.22955e+13	0.398113	353773	0.0721943	487.07	17.8278	-36.9219	1.57896	40	no
LBT-2mm/s	50_69	486	3.8	8.3	8.11293e+16	5.95197	1.20659e+13	0.40211	348661	0.063642	487.092	18.0928	-36.9181	1.56838	40	no
LBT-2mm/s	50_70	486	3.8	7.1	6.93997e+16	5.90567	1.15678e+13	0.411224	337501	0.063642	487.099	18.193	-36.9137	1.55629	40	no
LBT-2mm/s	50_71	486	3.7	5.8	5.66927e+16	5.84561	1.09531e+13	0.423393	323559	0.0551285	487.043	18.1773	-36.9087	1.54245	40	no
LBT-2mm/s	50_72	486	3.7	6	5.86477e+16	5.85553	1.10538e+13	0.421323	325855	0.0551285	486.967	18.1465	-36.906	1.53503	40	no
LBT-2mm/s	50_73	486	3.7	6.1	5.96251e+16	5.86037	1.11032e+13	0.420319	326980	0.0551285	486.876	18.1193	-36.9036	1.52861	40	no
LBT-2mm/s	50_74	486	3.8	6.6	6.45124e+16	5.88415	1.13419e+13	0.41557	332404	0.063642	486.814	18.1343	-36.9023	1.52489	40	no
LBT-2mm/s	50_75	486	3.9	7.1	6.93997e+16	5.90621	1.15678e+13	0.411224	337509	0.0721943	486.773	18.1611	-36.9015	1.52265	34	no
LBT-2mm/s	50_76	486	4.4	10.5	1.02633e+17	6.02446	1.28567e+13	0.388832	366179	0.115129	486.548	18.4525	-36.8989	1.51554	25	no
LBT-2mm/s	50_77	485	4.8	13.8	1.41603e+17	6.1227	1.4024e+13	0.371485	391533	0.149242	485.933	17.4455	-36.8992	1.51651	17	no
LBT-2mm/s	50_78	485	5.5	14.7	1.50838e+17	6.14239	1.42653e+13	0.368188	396711	0.207582	485.648	17.0164	-36.8942	1.50269	16	no
LBT-2mm/s	50_79	485	6.1	15.6	1.60073e+17	6.16074	1.4496e+13	0.365118	401640	0.255729	485.558	17.0086	-36.8904	1.49237	16	no
LBT-2mm/s	50_80	485	6.5	15.9	1.63152e+17	6.16662	1.45708e+13	0.364141	403233	0.286734	485.547	17.0076	-36.8871	1.48315	15	no
LBT-2mm/s	50_81	485	6.9	16.1	1.65204e+17	6.17049	1.462e+13	0.363501	404282	0.316812	485.58	17.0039	-36.884	1.47465	15	no
LBT-2mm/s	50_82	485	7.6	15.8	1.62126e+17	6.16469	1.4546e+13	0.364464	402705	0.367153	485.618	16.9997	-36.8817	1.46837	14	no
LBT-2mm/s	50_83	485	8.2	15.4	1.58021e+17	6.15679	1.44456e+13	0.365782	400566	0.407949	485.653	16.9967	-36.8797	1.46282	14	no
LBT-2mm/s	50_84	485	9.4	16.5	1.69308e+17	6.17807	14717232096958	0.362249	406348	0.483092	485.679	16.9948	-36.878	1.45801	13	no
LBT-2mm/s	50_85	485	10.5	17.5	1.7957e+17	6.19627	1.49529e+13	0.359267	411344	0.544697	485.698	16.9935	-36.8761	1.4528	13	no
LBT-2mm/s	50_86	485	13.3	22.6	2.31901e+17	6.27602	1.60219e+13	0.346637	433772	0.673246	485.709	16.9928	-36.8747	1.44906	12	no
LBT-2mm/s	50_87	485	16.1	27.6	2.83207e+17	6.33905	1.69103e+13	0.337131	452136	0.767856	485.716	16.9923	-36.8739	1.44683	11	no
LBT-2mm/s	50_88	485	20.4	36.8	3.77609e+17	6.43089	1.82761e+13	0.323982	479924	0.864762	485.729	16.991	-36.8724	1.44273	9	no
LBT-2mm/s	50_89	485	24.7	45.9	4.70985e+17	6.50233	1.93997e+13	0.314292	502410	0.922381	485.746	16.9891	-36.8708	1.43836	8	no
LBT-2mm/s	51_5	485	44.1	88.8	9.11187e+17	6.72046	2.31834e+13	0.287323	575975	0.994428	485.774	16.9863	-36.823	1.30669	7	no
[truncated: 20,804 more rows]
