# Supplementary material for: Smart extrusion via data-driven prediction of grain size and peripheral coarse grain defect formation
Source: Springer Nature journal article supplement (doi:10.1038/s41598-025-94884-4), 2025-03-19
Supplement: MOESM2 [file 41598_2025_94884_MOESM2_ESM.docx]

# Acknowledgements

The authors would like to extend their gratitude to Hydro Extrusions Finspång (Sweden) for producing the extruded profiles analyzed in this work, and to Dr. Antonio Segatori for his valuable supervision during their production.

# Author contributions

Marco Negozio, Lorenzo Donati and Adrian H.A. Lutey contributed equally to the scientific discussions, writing and revision of the manuscript. Marco Negozio and Lorenzo Donati performed microstructural analyses on extruded profiles, FEM simulations and analytical prediction of grain size and PCG formation. Adrian H.A. Lutey developed, optimized and tested ANNs for prediction of grain size and PCG.

# Data availability

All data generated or analysed during this study are included in this published article [and its supplementary information files].

# Competing interests

The authors declare no competing interests.
